# Supplementary material for: Asymmetric synthesis of 7-membered-ring-bridged 3,4-fused tricyclic indoles via Friedel–Crafts alkylation/annulation
Source: Royal Society of Chemistry journal article supplement (doi:10.1039/d2qo01982e), 2023-01-01
Supplement: d2qo01982e1.pdf [file d2qo01982e1.pdf]

## Supporting Information:

### Asymmetric Synthesis of 7-Membered-ring-bridged 3,4-Fused Tricyclic Indoles via Friedel–Crafts Alkylation/Annulation

Bai-Yu Xue, Chen-Ying Hou, Xiao-Bing Wang, Ming-Sheng Xie,\* and Hai-Ming Guo\*

NMPA Key Laboratory for Research and Evaluation of Innovative Drug, Key Laboratory of Green Chemical Media and Reactions, Ministry of Education, Collaborative Innovation Center of Henan Province for Green Manufacturing of Fine Chemicals, School of Chemistry and Chemical Engineering, Henan Normal University, Xinxiang, Henan 453007, China.

xiemingsheng@htu.edu.cn; ghm@htu.edu.cn

#### Contents

|                                                                                |     |
|--------------------------------------------------------------------------------|-----|
| General information.....                                                       | S2  |
| General procedure for the synthesis of chiral 3,4-fused tricyclic indoles..... | S3  |
| Synthesis of starting materials.....                                           | S17 |
| X-ray data.....                                                                | S24 |
| Optimization study.....                                                        | S29 |
| Mechanism study.....                                                           | S30 |
| Gram-scale synthesis of <b>3aa</b> .....                                       | S34 |
| HPLC Spectra.....                                                              | S35 |
| NMR Spectra.....                                                               | S56 |
| Reference.....                                                                 | S87 |

## General information

$^1\text{H}$  NMR spectra were recorded on Bruker Avance III HD 600 or Avance 400 MHz spectrometer. Chemical shifts are recorded in ppm relative to tetramethylsilane and with the solvent resonance as the internal standard. Data are reported as follows: chemical shift, multiplicity (s = singlet, d = doublet; t = triplet; q = quartet; sept = septet; m = multiplet; br = broad), coupling constants (Hz), integration.

$^{13}\text{C}$  NMR data were collected on Bruker Avance III HD 150 or Avance 100 MHz spectrometer. Chemical shifts are reported in ppm from the tetramethylsilane with the solvent resonance as internal standard.

Enantiomer excesses were determined by chiral HPLC analysis on Chiralcel IC/IA/ODH/ASH/IF in comparison with the authentic racemates. Chiral HPLC analysis recorded on Thermo scientific Dionex Ultimate 3000 and Agilent Technologies 1260 Infinity HPLC instruments. Optical rotations were reported as follows:  $[\alpha]_{\text{D}}^{\text{T}}$  (c: g/100 mL, in solvent). Optical rotations recorded on Autopol Automatic Polarimeter. HRMS was recorded on an ABI/Sciex QStar Mass Spectrometer (ESI). Single crystal X-ray crystallography data were obtained on Supernova Atlas S2 CCD detector. IR data were detected by Bruker Tensor II 400F.  $\text{CH}_2\text{Cl}_2$  and  $\text{PhCF}_3$  were purchased extra dry solvents.

## General procedure for the synthesis of chiral 3,4-fused tricyclic indoles

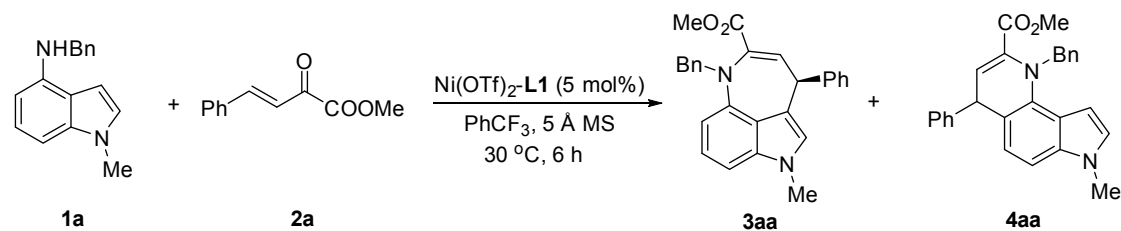

In a test tube, **L1** and Ni(OTf)<sub>2</sub> (5 mol%, 1:1) were added. Then β,γ-unsaturated α-ketoester **2a** (0.1 mmol, 19.0 mg), 5 Å MS (20 mg) and PhCF<sub>3</sub> (2.0 mL) were added at air atmosphere. After stirred at 30 °C for 0.5 hour, N-benzyl-1-methyl-1*H*-indol-4-amine **1a** (1.3 equiv., 30.7 mg) was added. The reaction mixture was stirred at 30 °C until β,γ-unsaturated α-ketoester **2a** was consumed (determined by TLC). Then, silica gel (1.0 g) was added and stirred for 1.5 h at 30 °C to promote dehydration completely. Finally, the reaction mixture was filtered and concentrated, and the residue was purified directly by flash column chromatography (Pet/EtOAc, 500/1~100/1, v/v) as eluent to afford the desired product **3aa**.

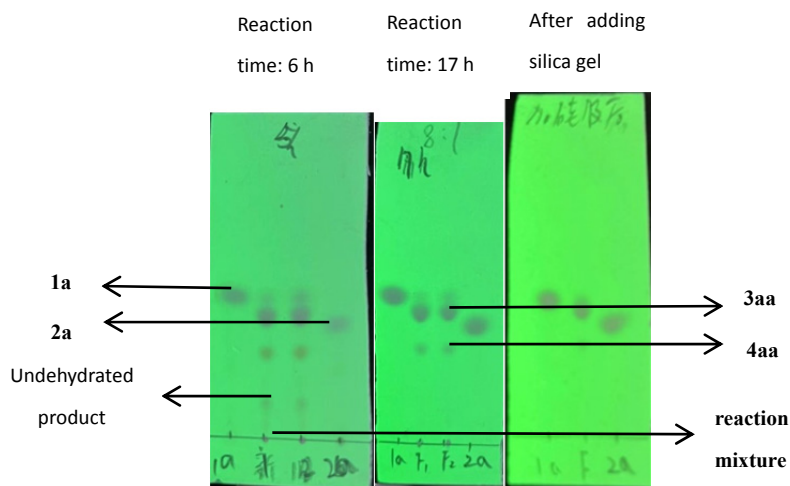

(Figure S1. Pet/EtOAc, 8/1, v/v).

### Methyl (S)-1-benzyl-6-methyl-4-phenyl-4,6-dihydro-1*H*-azepino[4,3,2-*cd*]indole-2-carboxylate (**3aa**)

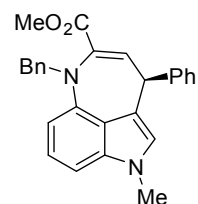

Yellow solid, (36.7mg, 90% yield, 91% ee). m.p. = 153.5 – 156.3 °C.

R<sub>f</sub> = 0.28 (Pet/EtOAc, 8/1, v/v).

$[\alpha]_D^{26} = -10.00$  ( $c = 0.72$ ,  $\text{CHCl}_3$ ).

**HPLC** CHIRALPAK IC, n-hexane/2-propanol =70/30, flow rate 0.8 mL/min,  $\lambda = 254$  nm, retention time:

(major) = 7.012 min, (minor) = 8.652 min.

**$^1\text{H}$  NMR** (400 MHz,  $\text{CDCl}_3$ )  $\delta$  7.44 – 7.31 (m, 5H), 7.24 – 7.17 (m, 5H), 7.13 (t,  $J = 8.0$  Hz, 1H), 6.95 (d,  $J = 6.4$  Hz, 1H), 6.83 (d,  $J = 8.0$  Hz, 1H), 6.67 (d,  $J = 7.6$  Hz, 1H), 6.13 (s, 1H), 5.28 (d,  $J = 6.8$  Hz, 1H), 4.85 (d,  $J = 14.0$  Hz, 1H), 4.76 (d,  $J = 13.6$  Hz, 1H), 3.64 (s, 3H), 3.61 (s, 3H).

**$^{13}\text{C}\{^1\text{H}\}$  NMR** (100 MHz,  $\text{CDCl}_3$ )  $\delta$  165.9, 142.5, 141.4, 138.4, 138.3, 137.8, 137.2, 128.9, 128.8, 128.6, 128.4, 127.3, 127.0, 123.1, 123.0, 120.6, 115.8, 104.9, 102.7, 54.2, 52.0, 42.3, 32.9.

**HRMS** (ESI-TOF)  $m/z$ :  $[\text{M}+\text{Na}]^+$  calcd for  $\text{C}_{27}\text{H}_{24}\text{N}_2\text{NaO}_2^+$  431.1730; found 431.1729.

**IR(neat)**: 2922, 1721, 1635, 1578, 1496, 1461, 1421, 1395, 1322, 1264, 1227, 1148, 1070, 1030, 790, 769, 741, 702  $\text{cm}^{-1}$ .

**Methyl 1-benzyl-7-methyl-4-phenyl-4,7-dihydro-1H-pyrrolo[2,3-*h*]quinoline-2-carboxylate (4aa)**

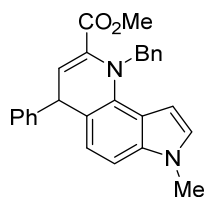

Yellow solid, (2.0 mg, 5% yield, 38% ee). m.p.  $\geq 300$  °C.

$R_f = 0.18$  (Pet/EtOAc, 8/1, v/v).

**HPLC** CHIRALPAK IA, n-hexane/2-propanol =90/10, flow rate 1.0 mL/min,  $\lambda = 254$  nm, retention time:

(minor) = 14.345 min, (major) = 17.138 min.

**$^1\text{H}$  NMR** (400 MHz,  $\text{CDCl}_3$ )  $\delta$  7.23 – 7.02 (m, 7H), 6.98 – 6.88 (m, 3H), 6.86 – 6.79 (m, 2H), 6.77 (d,  $J = 3.2$  Hz, 1H), 6.60 (d,  $J = 8.4$  Hz, 1H), 6.25 (d,  $J = 4.8$  Hz, 1H), 5.32 (d,  $J = 14.8$  Hz, 1H), 5.20 (d,  $J = 14.8$  Hz, 1H), 4.73 (d,  $J = 4.8$  Hz, 1H), 3.80 (s, 3H), 3.77 (s, 3H).

**$^{13}\text{C}\{^1\text{H}\}$  NMR** (100 MHz,  $\text{CDCl}_3$ )  $\delta$  165.2, 146.0, 138.0, 137.4, 136.2, 134.6, 129.2, 128.7, 128.5, 128.3, 127.9, 127.5, 126.2, 123.7, 123.5, 119.6, 119.3, 105.3, 100.9, 54.9, 52.2, 43.8, 33.2.

**HRMS** (ESI-TOF)  $m/z$ :  $[\text{M}+\text{Na}]^+$  calcd for  $\text{C}_{27}\text{H}_{24}\text{N}_2\text{NaO}_2^+$  431.1730; found 431.1726.

**IR(neat)**: 1727, 1716, 1645, 1485, 1437, 1289, 1269, 1245, 1122, 1098, 780, 767, 746, 717, 698, 655, 589  $\text{cm}^{-1}$ .

**Methyl (*R*)-1-benzyl-4-(2-fluorophenyl)-6-methyl-4,6-dihydro-1*H*-azepino[4,3,2-*cd*]indole-2-carboxylate (**3ab**)**

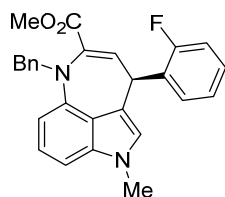

Yellow solid, (33.3 mg, 78% yield, 86% ee). m.p. = 74.5 – 76.5 °C.

$R_f$  = 0.36 (Pet/EtOAc, 8/1, v/v).

$[\alpha]_D^{26}$  = -19.63 ( $c$  = 0.69, CHCl<sub>3</sub>).

**HPLC** CHIRALPAK IC, n-hexane/2-propanol =70/30, flow rate 0.8 mL/min,  $\lambda$  = 254 nm, retention time:

(major) = 6.818 min, (minor) = 7.745 min.

**<sup>1</sup>H NMR** (600 MHz, CDCl<sub>3</sub>)  $\delta$  7.36 – 7.29 (m, 2H), 7.24 – 7.09 (m, 8H), 6.92 (dd,  $J$  = 6.6, 1.8 Hz, 1H), 6.87 (d,  $J$  = 7.8 Hz, 1H), 6.72 (d,  $J$  = 7.8 Hz, 1H), 6.27 (s, 1H), 5.57 (d,  $J$  = 6.6 Hz, 1H), 4.87 (d,  $J$  = 13.8 Hz, 1H), 4.75 (d,  $J$  = 13.8 Hz, 1H), 3.64 (s, 3H), 3.63 (s, 3H).

**<sup>13</sup>C{<sup>1</sup>H} NMR** (100 MHz, CDCl<sub>3</sub>)  $\delta$  165.8, 160.8 (d,  $J_{C-F}$  = 245.0 Hz), 141.5, 138.6, 138.4, 137.5, 135.5, 130.23, 130.19, 129.4 (d,  $J_{C-F}$  = 14.4 Hz), 129.0, 128.6 (d,  $J_{C-F}$  = 8.1 Hz), 128.4, 127.4, 124.4 (d,  $J_{C-F}$  = 3.5 Hz), 123.1, 122.8, 115.6 (d,  $J_{C-F}$  = 21.8 Hz), 113.7, 104.8, 102.8, 54.1, 52.0, 35.3 (d,  $J_{C-F}$  = 3.0 Hz), 33.0.

**HRMS** (ESI-TOF)  $m/z$ : [M+Na]<sup>+</sup> calcd for C<sub>27</sub>H<sub>23</sub>FN<sub>2</sub>NaO<sub>2</sub><sup>+</sup> 449.1636; found 449.1628.

**IR**(neat): 3030, 1716, 1635, 1582, 1496, 1454, 1434, 1420, 1329, 1230, 1188, 1148, 1121, 1051, 932, 752, 730, 700 cm<sup>-1</sup>.

**Methyl (*S*)-1-benzyl-4-(3-fluorophenyl)-6-methyl-4,6-dihydro-1*H*-azepino[4,3,2-*cd*]indole-2-carboxylate (**3ac**)**

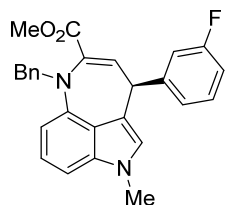

Yellow solid, (38.8 mg, 91% yield, 95% ee). m.p. = 65.1 – 68.2 °C.

$R_f$  = 0.36 (Pet/EtOAc, 8/1, v/v).

$[\alpha]_D^{26}$  = -25.26 ( $c$  = 0.69, CHCl<sub>3</sub>).

**HPLC** CHIRALPAK IC, n-hexane/2-propanol =70/30, flow rate 0.8 mL/min,  $\lambda$  = 254 nm, retention time:

(major) = 7.225 min, (minor) = 9.463 min.

$^1\text{H NMR}$  (600 MHz,  $\text{CDCl}_3$ )  $\delta$  7.40-7.33 (m, 1H), 7.25 – 7.18 (m, 3H), 7.18 – 7.12 (m, 4H), 7.09 (dt,  $J$  = 10.2, 2.4 Hz, 1H), 7.04 (td,  $J$  = 8.4, 1.8 Hz, 1H), 6.91 (d,  $J$  = 6.6 Hz, 1H), 6.86 (d,  $J$  = 8.4 Hz, 1H), 6.69 (d,  $J$  = 7.8 Hz, 1H), 6.21 (s, 1H), 5.26 (d,  $J$  = 6.0 Hz, 1H), 4.85 (d,  $J$  = 13.8 Hz, 1H), 4.77 (d,  $J$  = 13.8 Hz, 1H), 3.66 (s, 3H), 3.64 (s, 3H).

$^{13}\text{C}\{^1\text{H}\}$  NMR (150 MHz,  $\text{CDCl}_3$ )  $\delta$  165.8, 163.2(d,  $J_{\text{C-F}}$  = 244.5 Hz), 145.22, 145.18, 141.2, 138.8, 138.4, 137.6, 135.9, 130.1 (d,  $J_{\text{C-F}}$  = 9.0 Hz), 128.9, 128.4, 127.4, 124.3 (d,  $J_{\text{C-F}}$  = 3.0 Hz), 123.1 (d,  $J_{\text{C-F}}$  = 3.0 Hz), 120.5, 115.5 (d,  $J_{\text{C-F}}$  = 21.0 Hz), 114.8, 113.9 (d,  $J_{\text{C-F}}$  = 21.0 Hz), 105.0, 102.8, 54.1, 52.1, 41.9, 32.9.

**HRMS** (ESI-TOF)  $m/z$ :  $[\text{M}+\text{Na}]^+$  calcd for  $\text{C}_{27}\text{H}_{23}\text{FN}_2\text{NaO}_2^+$  449.1636; found 449.1633.

**IR**(neat): 3031, 1717, 1582, 1496, 1453, 1231, 1148, 767, 750, 730, 700  $\text{cm}^{-1}$ .

**Methyl (S)-1-benzyl-4-(4-fluorophenyl)-6-methyl-4,6-dihydro-1H-azepino[4,3,2-cd]indole-2-carboxylate (3ad)**

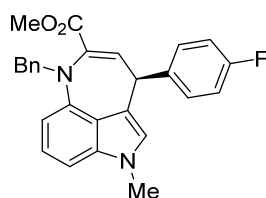

Yellow solid, (38.3 mg, 90% yield, 92% ee). m.p. = 143.5 – 146.6 °C.

$R_f$  = 0.30 (Pet/EtOAc, 8/1, v/v).

$[\alpha]_D^{26}$  = -18.54 (c = 0.71,  $\text{CHCl}_3$ ).

**HPLC** CHIRALPAK IC, n-hexane/2-propanol =70/30, flow rate 0.8 mL/min,  $\lambda$  = 254 nm, retention time: (major) = 7.368 min, (minor) = 9.503 min.

$^1\text{H NMR}$  (600 MHz,  $\text{CDCl}_3$ )  $\delta$  7.36 – 7.32 (m, 2H), 7.26 – 7.20 (m, 3H), 7.19 – 7.13 (m, 3H), 7.11 – 7.06 (m, 2H), 6.91 (d,  $J$  = 6.6 Hz, 1H), 6.85 (d,  $J$  = 8.4 Hz, 1H), 6.69 (d,  $J$  = 7.8 Hz, 1H), 6.15 (d,  $J$  = 1.2 Hz, 1H), 5.26 (d,  $J$  = 6.0 Hz, 1H), 4.85 (d,  $J$  = 13.8 Hz, 1H), 4.77 (d,  $J$  = 13.8 Hz, 1H), 3.66 (s, 3H), 3.63 (s, 3H).

$^{13}\text{C}\{^1\text{H}\}$  NMR (150 MHz,  $\text{CDCl}_3$ )  $\delta$  165.8, 161.9 (d,  $J_{\text{C-F}}$  = 243.0 Hz), 141.3, 138.6, 138.4, 138.3(d,  $J_{\text{C-F}}$  = 3.0 Hz), 137.7, 136.6, 130.0 (d,  $J_{\text{C-F}}$  = 7.5 Hz), 128.9, 128.4, 127.4, 123.1, 120.5, 115.5 (d,  $J_{\text{C-F}}$  = 21.0 Hz), 104.9, 102.8, 54.2, 52.1, 41.5, 32.9.

**HRMS** (ESI-TOF)  $m/z$ :  $[\text{M}+\text{Na}]^+$  calcd for  $\text{C}_{27}\text{H}_{23}\text{FN}_2\text{NaO}_2^+$  449.1636; found 449.1640.

**IR**(neat): 2922, 2852, 1716, 1606, 1497, 1460, 1262, 1226, 1187, 1148, 838, 798, 768, 731, 699  $\text{cm}^{-1}$ .

**Methyl (S)-1-benzyl-4-(3-bromophenyl)-6-methyl-4,6-dihydro-1H-azepino[4,3,2-cd]indole-2-carboxylate (3ae)**

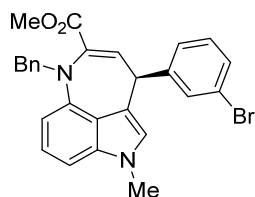

Yellow solid, (40.8 mg, 84% yield, 95% ee). m.p. = 64.7 – 69.4 °C.

$R_f$  = 0.35 (Pet/EtOAc, 8/1, v/v).

$[\alpha]_D^{26}$  = -28.66 (c = 0.67, CHCl<sub>3</sub>).

**HPLC** CHIRALPAK IC, n-hexane/2-propanol =70/30, flow rate 0.8 mL/min,  $\lambda$  = 254 nm, retention time:

(major) = 7.308 min, (minor) = 10.203 min.

**<sup>1</sup>H NMR** (600 MHz, CDCl<sub>3</sub>)  $\delta$  7.53 (t,  $J$  = 1.8 Hz, 1H), 7.47 (dt,  $J$  = 7.8, 1.2 Hz, 1H), 7.30 (dt,  $J$  = 7.8, 1.2 Hz, 1H), 7.27 – 7.19 (m, 4H), 7.17 – 7.12 (m, 3H), 6.89 (d,  $J$  = 6.0 Hz, 1H), 6.85 (d,  $J$  = 7.8 Hz, 1H), 6.68 (d,  $J$  = 7.8 Hz, 1H), 6.19 (s, 1H), 5.22 (d,  $J$  = 6.0 Hz, 1H), 4.84 (d,  $J$  = 13.8 Hz, 1H), 4.76 (d,  $J$  = 13.8 Hz, 1H), 3.66 (s, 3H), 3.63 (s, 3H).

**<sup>13</sup>C{<sup>1</sup>H} NMR** (150 MHz, CDCl<sub>3</sub>)  $\delta$  165.8, 145.0, 141.2, 138.8, 138.3, 137.6, 135.7, 131.6, 130.3, 130.1, 128.9, 128.4, 127.4, 127.2, 123.2, 123.1, 122.8, 120.5, 114.8, 105.0, 102.8, 54.2, 52.1, 41.8, 33.0.

**HRMS** (ESI-TOF)  $m/z$ : [M+Na]<sup>+</sup> calcd for C<sub>27</sub>H<sub>23</sub>BrN<sub>2</sub>NaO<sub>2</sub><sup>+</sup> 509.0835; found 509.0836.

**IR**(neat): 3030, 2925, 1717, 1633, 1580, 1497, 1461, 1421, 1399, 1327, 1231, 1148, 1072, 1052, 768, 731, 698 cm<sup>-1</sup>.

**Methyl (S)-1-benzyl-4-(4-bromophenyl)-6-methyl-4,6-dihydro-1H-azepino[4,3,2-cd]indole-2-carboxylate (3af)**

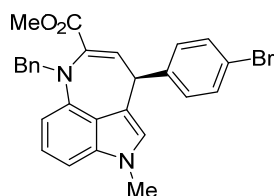

Yellow solid, (37.9 mg, 78% yield, 96% ee). m.p. = 74.3 – 77.4 °C.

$R_f$  = 0.37 (Pet/EtOAc, 8/1, v/v).

$[\alpha]_D^{26}$  = -23.21 (c = 0.95, CHCl<sub>3</sub>).

**HPLC** CHIRALPAK IC, n-hexane/2-propanol =70/30, flow rate 0.8 mL/min,  $\lambda$  = 254 nm, retention time:

(major) = 7.683 min, (minor) = 9.775 min.

$^1\text{H NMR}$  (600 MHz,  $\text{CDCl}_3$ )  $\delta$  7.53 – 7.48 (m, 2H), 7.25 – 7.18 (m, 5H), 7.17 – 7.09 (m, 3H), 6.90 (d,  $J$  = 6.6 Hz, 1H), 6.85 (d,  $J$  = 8.4 Hz, 1H), 6.68 (d,  $J$  = 7.8 Hz, 1H), 6.19 (d,  $J$  = 1.2 Hz, 1H), 5.20 (d,  $J$  = 6.6 Hz, 1H), 4.83 (d,  $J$  = 13.8 Hz, 1H), 4.75 (d,  $J$  = 13.8 Hz, 1H), 3.66 (s, 3H), 3.63 (s, 3H).

$^{13}\text{C}\{^1\text{H}\}$  NMR (150 MHz,  $\text{CDCl}_3$ )  $\delta$  165.8, 141.7, 141.2, 138.8, 138.4, 137.6, 135.9, 131.8, 130.3, 128.9, 128.4, 127.4, 123.2, 123.1, 120.7, 120.5, 114.9, 105.0, 102.8, 54.1, 52.1, 41.5, 33.0.

HRMS (ESI-TOF)  $m/z$ :  $[\text{M}+\text{Na}]^+$  calcd for  $\text{C}_{27}\text{H}_{23}\text{BrN}_2\text{NaO}_2^+$  509.0835; found 509.0834.

IR(neat): 2925, 1717, 1633, 1580, 1497, 1461, 1421, 1327, 1231, 1148, 1072, 1052, 768, 731, 698  $\text{cm}^{-1}$ .

**Methyl 1-benzyl-4-(4-bromophenyl)-7-methyl-4,7-dihydro-1H-pyrrolo[2,3-*h*]quinoline-2-Carboxylate (4af)**

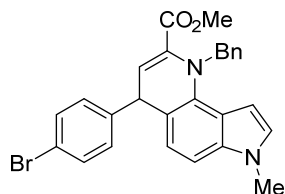

Yellow solid, (7.7 mg, 16% yield). m.p. = 155.5 – 159.3 °C.

$R_f$  = 0.15 (Pet/EtOAc, 8/1, v/v).

$^1\text{H NMR}$  (600 MHz,  $\text{CDCl}_3$ )  $\delta$  7.24-7.17 (m, 3H), 7.15 – 7.07 (m, 3H), 6.94 (d,  $J$  = 8.4 Hz, 1H), 6.84 (d,  $J$  = 7.8 Hz, 2H), 6.75 (d,  $J$  = 3.0 Hz, 1H), 6.57 (dd,  $J$  = 25.8, 7.8 Hz, 3H), 6.17 (d,  $J$  = 4.8 Hz, 1H), 5.32 (d,  $J$  = 14.4 Hz, 1H), 5.13 (d,  $J$  = 14.4 Hz, 1H), 4.68 (d,  $J$  = 6.0 Hz, 1H), 3.81 (s, 3H), 3.78 (s, 3H).

$^{13}\text{C}\{^1\text{H}\}$  NMR (150 MHz,  $\text{CDCl}_3$ )  $\delta$  165.2, 145.0, 137.8, 137.4, 136.0, 134.9, 131.5, 130.3, 129.2, 128.4, 128.1, 127.6, 123.4, 122.6, 120.1, 119.7, 118.7, 105.6, 101.0, 54.7, 52.3, 43.3, 33.3.

IR(neat): 2922, 2853, 2158, 1724, 1646, 1490, 1482, 1453, 1305, 1290, 1265, 1237, 1183, 1119, 1104, 1094, 1076, 1008, 778, 747, 723, 699  $\text{cm}^{-1}$ .

**Methyl (S)-1-benzyl-4-(3-chlorophenyl)-6-methyl-4,6-dihydro-1H-azepino[4,3,2-*cd*]indole-2-carboxylate (3ag)**

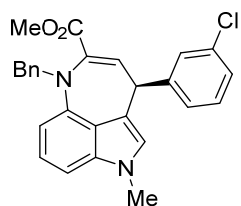

Pale yellow solid, (35.8 mg, 81% yield, 96% ee).

$R_f$  = 0.33 (Pet/EtOAc, 8/1, v/v). m.p. = 68.1 – 71.4 °C.



$[\alpha]_D^{26} = -30.93$  ( $c = 0.72$ ,  $\text{CHCl}_3$ ).

**HPLC** CHIRALPAK IC, n-hexane/2-propanol =70/30, flow rate 0.8 mL/min,  $\lambda = 254$  nm, retention time:

(major) = 7.178 min, (minor) = 9.853 min.

**$^1\text{H}$  NMR** (600 MHz,  $\text{CDCl}_3$ )  $\delta$  7.38 (s, 1H), 7.34 – 7.31 (m, 2H), 7.26 – 7.19 (m, 4H), 7.17 – 7.12 (m, 3H), 6.90 (d,  $J = 6.6$  Hz, 1H), 6.85 (d,  $J = 7.8$  Hz, 1H), 6.69 (d,  $J = 7.8$  Hz, 1H), 6.19 (d,  $J = 1.2$  Hz, 1H), 5.23 (d,  $J = 6.6$  Hz, 1H), 4.84 (d,  $J = 13.8$  Hz, 1H), 4.77 (d,  $J = 13.8$  Hz, 1H), 3.66 (s, 3H), 3.64 (s, 3H).

**$^{13}\text{C}\{^1\text{H}\}$  NMR** (150 MHz,  $\text{CDCl}_3$ )  $\delta$  165.8, 144.7, 141.2, 138.8, 138.4, 137.6, 135.8, 134.5, 130.0, 128.9, 128.7, 128.4, 127.4, 127.2, 126.8, 123.2, 123.1, 120.5, 114.8, 105.0, 102.8, 54.1, 52.1, 41.8, 32.9.

**HRMS** (ESI-TOF)  $m/z$ :  $[\text{M}+\text{Na}]^+$  calcd for  $\text{C}_{27}\text{H}_{23}\text{ClN}_2\text{NaO}_2^+$  465.1340; found 465.1344.

**IR(neat)**: 3359, 2922, 2852, 1717, 1632, 1580, 1497, 1460, 1421, 1327, 1229, 1148, 768,  $698\text{ cm}^{-1}$ .

**Methyl (S)-1-benzyl-4-(4-chlorophenyl)-6-methyl-4,6-dihydro-1H-azepino[4,3,2-cd]indole-2-carboxylate (3ah)**

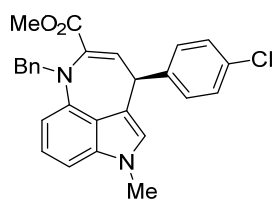

Pale yellow solid, (35.8 mg, 81% yield, 96% ee). m.p. = 109.7 – 112.5 °C.

$R_f = 0.32$  (Pet/EtOAc, 8/1, v/v).

$[\alpha]_D^{26} = -24.84$  ( $c = 0.72$ ,  $\text{CHCl}_3$ ).

**HPLC** CHIRALPAK IC, n-hexane/2-propanol =70/30, flow rate 0.8 mL/min,  $\lambda = 254$  nm, retention time:

(major) = 7.463 min, (minor) = 9.500 min.

**$^1\text{H}$  NMR** (600 MHz,  $\text{CDCl}_3$ )  $\delta$  7.39 – 7.34 (m, 2H), 7.33 – 7.28 (m, 2H), 7.25 – 7.19 (m, 3H), 7.17 – 7.10 (m, 3H), 6.91 (d,  $J = 6.0$  Hz, 1H), 6.85 (d,  $J = 8.4$  Hz, 1H), 6.69 (d,  $J = 7.8$  Hz, 1H), 6.18 (s, 1H), 5.23 (d,  $J = 6.6$  Hz, 1H), 4.84 (d,  $J = 13.8$  Hz, 1H), 4.76 (d,  $J = 13.8$  Hz, 1H), 3.66 (s, 3H), 3.63 (s, 3H).

**$^{13}\text{C}\{^1\text{H}\}$  NMR** (150 MHz,  $\text{CDCl}_3$ )  $\delta$  165.8, 141.23, 141.17, 138.8, 138.4, 137.6, 136.1, 132.7, 129.9, 128.9, 128.8, 128.4, 127.4, 123.1, 120.5, 115.1, 105.0, 102.8, 54.1, 52.1, 41.5, 32.9.

**HRMS** (ESI-TOF)  $m/z$ :  $[\text{M}+\text{Na}]^+$  calcd for  $\text{C}_{27}\text{H}_{23}\text{ClN}_2\text{NaO}_2^+$  465.1340; found 465.1347.

**IR(neat)**: 2920, 1737, 1712, 1581, 1498, 1454, 1393, 1319, 1262, 1234, 1188, 1157, 1047, 1014, 840, 771, 755, 745, 734,  $698\text{ cm}^{-1}$ .

**Methyl (S)-1-benzyl-4-(3,4-difluorophenyl)-6-methyl-4,6-dihydro-1H-azepino[4,3,2-cd]indole-2-carboxylate (3ai)**

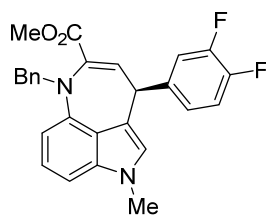

Yellow solid, (27.5 mg, 62% yield, 96% ee). m.p. = 69.4 – 73.7 °C.

R<sub>f</sub> = 0.35 (Pet/EtOAc, 8/1, v/v).

[α]<sub>D</sub><sup>26</sup> = -33.93 (c = 1.18, CHCl<sub>3</sub>).

**HPLC** CHIRALPAK IC, n-hexane/2-propanol =70/30, flow rate 0.8 mL/min, λ = 254 nm, retention time:  
(minor) = 7.273 min, (major) = 9.675 min.

**<sup>1</sup>H NMR** (600 MHz, CDCl<sub>3</sub>) δ 7.25 – 7.19 (m, 3H), 7.19 – 7.10 (m, 5H), 7.09 – 7.05 (m, 1H), 6.85 (d, J = 7.2 Hz, 2H), 6.68 (d, J = 7.8 Hz, 1H), 6.22 (s, 1H), 5.18 (d, J = 6.6 Hz, 1H), 4.81 (d, J = 13.8 Hz, 1H), 4.76 (d, J = 13.8 Hz, 1H), 3.66 (s, 3H), 3.65 (s, 3H).

**<sup>13</sup>C{<sup>1</sup>H} NMR** (150 MHz, CDCl<sub>3</sub>) δ 165.8, 150.5 (dd, J<sub>C-F</sub> = 246.0, 12.0 Hz), 149.4 (dd, J<sub>C-F</sub> = 244.5, 12.0 Hz), 141.2, 139.7 (t, J<sub>C-F</sub> = 3.0 Hz), 138.9, 138.4, 137.6, 135.4, 128.9, 128.4, 127.4, 124.4 (q, J<sub>C-F</sub> = 3.0 Hz), 123.2, 123.1, 120.4, 117.4 (t, J<sub>C-F</sub> = 18.0 Hz), 114.6, 105.0, 102.9, 54.1, 52.1, 41.2, 33.0.

**HRMS** (ESI-TOF) m/z: [M+Na]<sup>+</sup> calcd for C<sub>27</sub>H<sub>22</sub>F<sub>2</sub>N<sub>2</sub>NaO<sub>2</sub><sup>+</sup> 467.1542; found 467.1536.

**IR**(neat): 2922, 1417, 1633, 1607, 1580, 1497, 1460, 1421, 1326, 1238, 1149, 1051, 767, 732 cm<sup>-1</sup>.

**Methyl (S)-1-benzyl-4-(3,4-dichlorophenyl)-6-methyl-4,6-dihydro-1H-azepino[4,3,2-cd]indole-2-Carboxylate (3aj)**

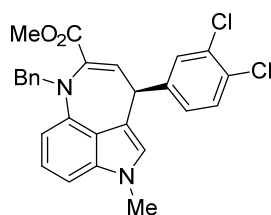

Pale yellow solid, (35.7 mg, 75% yield, 97% ee). m.p. = 73.7 – 82.7 °C

R<sub>f</sub> = 0.32 (Pet/EtOAc, 8/1, v/v).

[α]<sub>D</sub><sup>26</sup> = -45.55 (c = 1.67, CHCl<sub>3</sub>).

**HPLC** CHIRALPAK IC, n-hexane/2-propanol =70/30, flow rate 0.8 mL/min, λ = 254 nm, retention time:  
(major) = 7.485 min, (minor) = 10.175 min.

$^1\text{H NMR}$  (600 MHz,  $\text{CDCl}_3$ )  $\delta$  7.46 – 7.42 (m, 2H), 7.24 – 7.12 (m, 5H), 7.09 (dd,  $J = 7.2, 2.4$  Hz, 2H), 6.89 – 6.83 (m, 2H), 6.68 (d,  $J = 7.8$  Hz, 1H), 6.24 (s, 1H), 5.16 (d,  $J = 6.6$  Hz, 1H), 4.81 (d,  $J = 13.8$  Hz, 1H), 4.75 (d,  $J = 13.8$  Hz, 1H), 3.67 (s, 3H), 3.65 (s, 3H).

$^{13}\text{C}\{^1\text{H}\}$  NMR (150 MHz,  $\text{CDCl}_3$ )  $\delta$  165.8, 143.1, 141.1, 139.1, 138.4, 137.5, 134.9, 132.6, 130.9, 130.6, 130.5, 128.8, 128.4, 127.9, 127.4, 123.2, 120.4, 114.2, 105.1, 102.9, 54.1, 52.1, 41.1, 33.0.

HRMS (ESI-TOF)  $m/z$ :  $[\text{M}+\text{Na}]^+$  calcd for  $\text{C}_{27}\text{H}_{22}\text{Cl}_2\text{N}_2\text{NaO}_2^+$  499.0951; found 499.0951.

IR(neat): 2922, 1717, 1633, 1580, 1497, 1462, 1421, 1401, 1326, 1231, 1148, 1053, 1029, 828, 766, 731, 698  $\text{cm}^{-1}$ .

**Methyl (S)-1-benzyl-6-methyl-4-(*m*-tolyl)-4,6-dihydro-1*H*-azepino[4,3,2-*cd*]indole-2-carboxylate (3ak)**

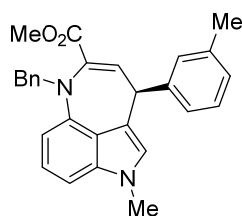

Yellow solid, (33.8 mg, 80% yield, 88% ee). m.p. = 85.5 – 88.6 °C.

$R_f = 0.27$  (Pet/EtOAc, 8/1, v/v).

$[\alpha]_D^{26} = -2.67$  ( $c = 0.75$ ,  $\text{CHCl}_3$ ).

HPLC CHIRALPAK IC, n-hexane/2-propanol =70/30, flow rate 0.8 mL/min,  $\lambda = 254$  nm, retention time: (major) = 7.148 min, (minor) = 9.178 min.

$^1\text{H NMR}$  (400 MHz,  $\text{CDCl}_3$ )  $\delta$  7.29 (t,  $J = 7.6$  Hz, 1H), 7.25 – 7.09 (m, 9H), 6.95 (d,  $J = 6.0$  Hz, 1H), 6.83 (d,  $J = 8.4$  Hz, 1H), 6.67 (d,  $J = 7.6$  Hz, 1H), 6.12 (s, 1H), 5.27 (d,  $J = 6.0$  Hz, 1H), 4.87 (d,  $J = 14.0$  Hz, 1H), 4.77 (d,  $J = 13.6$  Hz, 1H), 3.65 (s, 3H), 3.61 (s, 3H), 2.40 (s, 3H).

$^{13}\text{C}\{^1\text{H}\}$  NMR (100 MHz,  $\text{CDCl}_3$ )  $\delta$  165.9, 142.4, 141.4, 138.4, 138.3, 137.9, 137.6, 129.3, 128.9, 128.7, 128.4, 127.7, 127.3, 125.6, 123.1, 123.0, 120.7, 116.0, 104.8, 102.7, 54.2, 52.0, 42.4, 32.9, 21.7.

HRMS (ESI-TOF)  $m/z$ :  $[\text{M}+\text{Na}]^+$  calcd for  $\text{C}_{28}\text{H}_{26}\text{N}_2\text{NaO}_2^+$  445.1886; found 445.1883.

IR(neat): 2947, 1717, 1633, 1580, 1497, 1460, 1421, 1327, 1231, 1148, 1072, 1052, 768, 698  $\text{cm}^{-1}$ .

**Methyl (S)-1-benzyl-6-methyl-4-(*p*-tolyl)-4,6-dihydro-1*H*-azepino[4,3,2-*cd*]indole-2-carboxylate (3a)**

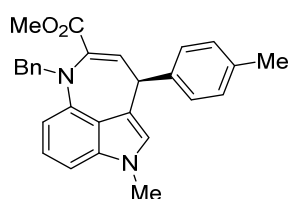

Yellow solid, (38.0 mg, 90% yield, 93% ee). m.p. = 111.6 – 114.2 °C.

$R_f$  = 0.27 (Pet/EtOAc, 8/1, v/v).

$[\alpha]_D^{26}$  = 1.48 (c = 1.44, CHCl<sub>3</sub>).

**HPLC** CHIRALPAK IC, n-hexane/2-propanol =70/30, flow rate 0.8 mL/min,  $\lambda$  = 254 nm, retention time:

(major) = 7.098 min, (minor) = 8.667 min.

**<sup>1</sup>H NMR** (600 MHz, CDCl<sub>3</sub>)  $\delta$  7.28 – 7.15 (m, 9H), 7.11 (t,  $J$  = 7.8 Hz, 1H), 6.94 (d,  $J$  = 6.0 Hz, 1H), 6.81 (d,  $J$  = 8.4 Hz, 1H), 6.66 (d,  $J$  = 7.8 Hz, 1H), 6.12 (s, 1H), 5.26 (d,  $J$  = 6.0 Hz, 1H), 4.85 (d,  $J$  = 13.8 Hz, 1H), 4.75 (d,  $J$  = 13.8 Hz, 1H), 3.63 (s, 3H), 3.60 (s, 3H), 2.40 (s, 3H).

**<sup>13</sup>C{<sup>1</sup>H} NMR** (150 MHz, CDCl<sub>3</sub>)  $\delta$  165.9, 141.4, 139.4, 138.4, 138.3, 137.9, 137.6, 136.5, 129.4, 128.9, 128.5, 128.4, 127.3, 123.1, 123.0, 120.7, 116.0, 104.9, 102.6, 54.2, 52.0, 42.0, 32.9, 21.3.

**HRMS** (ESI-TOF)  $m/z$ : [M+Na]<sup>+</sup> calcd for C<sub>28</sub>H<sub>26</sub>N<sub>2</sub>NaO<sub>2</sub><sup>+</sup> 445.1886; found 445.1886.

**IR**(neat): 3029, 2947, 1717, 1633, 1607, 1580, 1497, 1460, 1421, 1327, 1231, 1148, 1072, 768, 732, 698 cm<sup>-1</sup>.

**Methyl (S)-1-benzyl-4-(4-methoxyphenyl)-6-methyl-4,6-dihydro-1*H*-azepino[4,3,2-*cd*]indole-2-carboxylate (3am)**

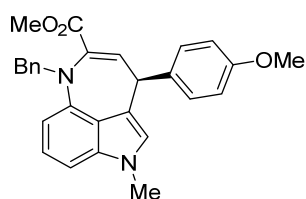

Pale yellow solid, (29.3 mg, 67% yield, 95% ee). m.p. = 168.3 – 171.4 °C.

$R_f$  = 0.18 (Pet/EtOAc, 8/1, v/v).

$[\alpha]_D^{26}$  = -5.49 (c = 0.60, CHCl<sub>3</sub>).

**HPLC** CHIRALPAK IC, n-hexane/2-propanol =70/30, flow rate 0.8 mL/min,  $\lambda$  = 254 nm, retention time:

(major) = 8.547 min, (minor) = 10.473 min.

**<sup>1</sup>H NMR** (400 MHz, CDCl<sub>3</sub>)  $\delta$  7.32 – 7.28 (m, 2H), 7.25 – 7.16 (m, 5H), 7.12 (t,  $J$  = 8.0 Hz, 1H), 6.98 – 6.89 (m, 3H), 6.82 (d,  $J$  = 8.0 Hz, 1H), 6.66 (d,  $J$  = 7.6 Hz, 1H), 6.13 (d,  $J$  = 1.2 Hz, 1H), 5.25 (d,  $J$  = 6.4,

1H), 4.86 (d,  $J = 14.0$  Hz, 1H), 4.76 (d,  $J = 14.0$  Hz, 1H), 3.85 (s, 3H), 3.64 (s, 3H), 3.60 (s, 3H).

$^{13}\text{C}\{^1\text{H}\}$  NMR (100 MHz,  $\text{CDCl}_3$ )  $\delta$  165.9, 158.7, 141.4, 138.4, 138.2, 137.9, 137.7, 134.6, 129.6, 128.9, 128.4, 127.3, 123.1, 123.0, 120.6, 116.2, 114.1, 104.8, 102.7, 55.5, 54.2, 52.0, 41.6, 32.9.

HRMS (ESI-TOF)  $m/z$ :  $[\text{M}+\text{Na}]^+$  calcd for  $\text{C}_{28}\text{H}_{26}\text{N}_2\text{NaO}_3^+$  461.1836; found 461.1841.

IR(neat): 2924, 1717, 1633, 1581, 1497, 1460, 1421, 1327, 1230, 1148, 1071, 1052, 768, 732  $\text{cm}^{-1}$ .

**Methyl (S)-4-([1,1'-biphenyl]-4-yl)-1-benzyl-6-methyl-4,6-dihydro-1H-azepino[4,3,2-cd]indole-2-carboxylate (3an)**

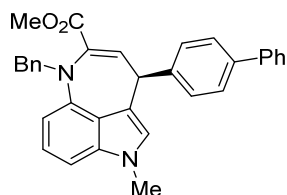

Yellow solid, (35.8 mg, 73% yield, 95% ee). m.p. = 89.9 – 94.1 °C.

$R_f = 0.32$  (Pet/EtOAc, 8/1, v/v).

$[\alpha]_D^{26} = -17.14$  ( $c = 1.65$ ,  $\text{CHCl}_3$ ).

HPLC CHIRALPAK IC, n-hexane/2-propanol = 70/30, flow rate 0.8 mL/min,  $\lambda = 254$  nm, retention time: (major) = 8.448 min, (minor) = 11.053 min.

$^1\text{H}$  NMR (600 MHz,  $\text{CDCl}_3$ )  $\delta$  7.70 – 7.61 (m, 4H), 7.52 – 7.44 (m, 4H), 7.43 – 7.36 (m, 1H), 7.24 – 7.12 (m, 6H), 7.01 (d,  $J = 6.6$  Hz, 1H), 6.86 (d,  $J = 8.4$  Hz, 1H), 6.70 (d,  $J = 7.8$  Hz, 1H), 6.25 (d,  $J = 1.2$  Hz, 1H), 5.33 (d,  $J = 6.6$  Hz, 1H), 4.88 (d,  $J = 13.8$  Hz, 1H), 4.79 (d,  $J = 13.8$  Hz, 1H), 3.67 (s, 3H), 3.64 (s, 3H).

$^{13}\text{C}\{^1\text{H}\}$  NMR (150 MHz,  $\text{CDCl}_3$ )  $\delta$  165.9, 141.7, 141.4, 141.1, 140.0, 138.5, 138.4, 137.7, 136.8, 128.98, 128.95, 128.9, 128.4, 127.5, 127.4, 127.3, 127.2, 123.2, 123.1, 120.7, 115.5, 104.9, 102.7, 54.2, 52.0, 41.8, 32.9.

IR(neat): 2924, 1717, 1633, 1580, 1497, 1460, 1421, 1327, 1232, 1071, 1052, 768, 732, 698  $\text{cm}^{-1}$ .

**Methyl (R)-1-benzyl-6-methyl-4-(thiophen-2-yl)-4,6-dihydro-1H-azepino[4,3,2-cd]indole-2-carboxylate (3ao)**

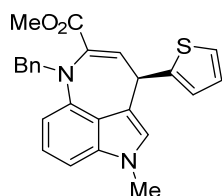

Yellow solid, (33.9 mg, 82% yield, 88% ee). m.p. = 65.4 – 71.5 °C.

$R_f = 0.26$  (Pet/EtOAc, 8/1, v/v).

$[\alpha]_D^{26} = -12.03$  ( $c = 1.69$ ,  $\text{CHCl}_3$ ).

**HPLC** CHIRALPAK IC, n-hexane/2-propanol =70/30, flow rate 0.8 mL/min,  $\lambda = 254$  nm, retention time:

(major) = 7.647 min, (minor) = 8.822 min.

**$^1\text{H}$  NMR** (600 MHz,  $\text{CDCl}_3$ )  $\delta$  7.28 (dd,  $J = 4.8, 1.2$  Hz, 1H), 7.25 – 7.17 (m, 5H), 7.13 (t,  $J = 7.8$  Hz, 1H), 7.06 – 7.01 (m, 2H), 6.92 (d,  $J = 6.6$  Hz, 1H), 6.84 (d,  $J = 7.8$  Hz, 1H), 6.67 (d,  $J = 7.8$  Hz, 1H), 6.45 (s, 1H), 5.61 (d,  $J = 6.6$  Hz, 1H), 4.84 (d,  $J = 13.8$  Hz, 1H), 4.80 (d,  $J = 13.8$  Hz, 1H), 3.67 (s, 3H), 3.65 (s, 3H).

**$^{13}\text{C}\{^1\text{H}\}$  NMR** (150 MHz,  $\text{CDCl}_3$ )  $\delta$  165.8, 145.7, 141.0, 138.5, 138.3, 137.7, 136.5, 128.8, 128.4, 127.3, 126.9, 125.4, 124.0, 123.14, 123.11, 120.3, 115.1, 105.0, 102.8, 54.1, 52.1, 37.3, 33.0.

**HRMS** (ESI-TOF)  $m/z$ :  $[\text{M}+\text{Na}]^+$  calcd for  $\text{C}_{25}\text{H}_{22}\text{N}_2\text{NaO}_2\text{S}^+$  437.1294; found 437.1291.

**IR(neat)**: 2920, 2851, 1716, 1580, 1496, 1460, 1421, 1325, 1239, 1148, 1069, 767, 732, 697  $\text{cm}^{-1}$ .

**Methyl (*R*)-1-benzyl-4-cyclohexyl-6-methyl-4,6-dihydro-1*H*-azepino[4,3,2-*cd*]indole-2-carboxylate**

**(3ap)**

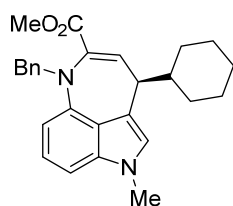

Yellow solid, (9.0 mg, 22% yield, 89% ee). m.p. = 135.2 – 138.4 °C.

$R_f = 0.32$  (Pet/EtOAc, 8/1, v/v).

$[\alpha]_D^{25} = -79.09$  ( $c = 0.88$ ,  $\text{CHCl}_3$ ).

**HPLC** CHIRALPAK IC, n-hexane/2-propanol =70/30, flow rate 0.8 mL/min,  $\lambda = 254$  nm, retention time:

(major) = 9.382 min, (minor) = 12.107 min.

**$^1\text{H}$  NMR** (400 MHz,  $\text{CDCl}_3$ )  $\delta$  7.35 (d,  $J = 7.2$  Hz, 2H), 7.31 – 7.27 (m, 2H), 7.25 – 7.20 (m, 1H), 7.12 (t,  $J = 8.0$  Hz, 1H), 6.83 (d,  $J = 8.0$  Hz, 1H), 6.71 (d,  $J = 8.4$  Hz, 1H), 6.65 (d,  $J = 8.0$  Hz, 1H), 6.59 (s, 1H), 4.78 (s, 2H), 3.68 (s, 3H), 3.62 (s, 3H), 3.25 (t,  $J = 8.8$  Hz, 1H), 2.16 – 2.05 (m, 1H), 1.91 (d,  $J = 13.2$  Hz, 1H), 1.80 – 1.64 (m, 4H), 1.22 – 1.11 (m, 2H), 1.09 – 0.79 (m, 3H).

**$^{13}\text{C}\{^1\text{H}\}$  NMR** (100 MHz,  $\text{CDCl}_3$ )  $\delta$  166.2, 141.5, 138.2, 137.8, 137.7, 135.5, 129.7, 128.3, 127.5, 123.2, 122.7, 120.0, 113.7, 104.0, 102.4, 54.0, 51.9, 42.4, 40.3, 32.9, 32.0, 31.7, 26.7, 26.5.

**IR(neat)**: 2917, 2848, 1714, 1577, 1498, 1461, 1449, 1419, 1406, 1327, 1298, 1245, 1153, 1129, 1057, 769, 735, 714, 700  $\text{cm}^{-1}$ .

**Methyl 1-benzyl-4-cyclohexyl-7-methyl-4,7-dihydro-1H-pyrrolo[2,3-h]quinoline-2-carboxylate (4ap)**

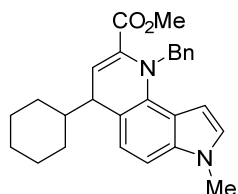

Yellow solid, (16.8 mg, 41% yield, 5% ee). m.p. = 168.0 – 170.2 °C.

$R_f$  = 0.27 (Pet/EtOAc, 8/1, v/v).

**HPLC** CHIRALPAK IC, n-hexane/2-propanol =70/30, flow rate 0.8 mL/min,  $\lambda$  = 254 nm, retention time:

(major) = 23.158 min, (minor) = 13.753 min.

**$^1\text{H NMR}$**  (600 MHz,  $\text{CDCl}_3$ )  $\delta$  7.25 – 7.15 (m, 3H), 7.07 (d,  $J$  = 3.0 Hz, 1H), 7.01 (d,  $J$  = 8.4 Hz, 1H), 6.94 (d,  $J$  = 7.2 Hz, 2H), 6.76 (d,  $J$  = 3.0 Hz, 1H), 6.72 (d,  $J$  = 8.4 Hz, 1H), 6.42 (d,  $J$  = 6.6 Hz, 1H), 5.39 (d,  $J$  = 14.4 Hz, 1H), 5.14 (d,  $J$  = 15.0 Hz, 1H), 3.86 (s, 3H), 3.80 (s, 3H), 2.92 (dd,  $J$  = 9.0, 7.2 Hz, 1H), 1.60 (d,  $J$  = 12.0 Hz, 1H), 1.51 (d,  $J$  = 9.6 Hz, 3H), 1.39 (d,  $J$  = 12.0 Hz, 3H), 1.10 – 0.95 (d,  $J$  = 12.0 Hz, 1H), 0.85 – 0.65 (m, 4H), 0.17 – 0.08 (m, 1H).

**$^{13}\text{C}\{^1\text{H}\}$  NMR** (150 MHz,  $\text{CDCl}_3$ )  $\delta$  165.3, 138.0, 137.1, 135.9, 134.1, 129.4, 128.2, 127.7, 127.5, 126.1, 124.1, 120.3, 120.1, 104.3, 100.4, 54.1, 52.1, 45.8, 44.6, 33.2, 31.1, 30.2, 26.7, 26.1, 26.0.

**HRMS** (ESI-TOF)  $m/z$ :  $[\text{M}+\text{Na}]^+$  calcd for  $\text{C}_{27}\text{H}_{30}\text{N}_2\text{NaO}_2^+$  437.2199; found 437.2198.

**IR**(neat): 2920, 2854, 1720, 1637, 1485, 1448, 1436, 1421, 1307, 1292, 1262, 1240, 1219, 1126, 1100, 1080, 1032, 789, 762, 746, 714, 705  $\text{cm}^{-1}$ .

**Methyl (S)-1,6-dimethyl-4-phenyl-4,6-dihydro-1H-azepino[4,3,2-cd]indole-2-carboxylate (3ba)**

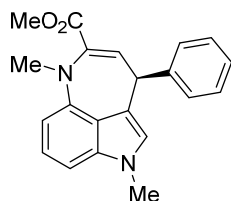

White solid, (25.9 mg, 78% yield, 84% ee). m.p. = 148.5 – 150.1 °C.

$R_f$  = 0.40 (Pet/EtOAc, 8/1, v/v).

$[\alpha]_D^{26} = +6.82$  ( $c$  = 0.440,  $\text{CHCl}_3$ ).

**HPLC** CHIRALPAK IC, n-hexane/2-propanol =70/30, flow rate 0.8 mL/min,  $\lambda$  = 254 nm, retention time:

(major) = 9.128 min, (minor) = 11.215 min.

**<sup>1</sup>H NMR** (400 MHz, CDCl<sub>3</sub>) δ 7.42 – 7.28 (m, 5H), 7.15 (t, *J* = 8.0 Hz, 1H), 6.87 (d, *J* = 6.0 Hz, 1H), 6.80 (d, *J* = 8.0 Hz, 1H), 6.59 (d, *J* = 7.6 Hz, 1H), 6.07 (s, 1H), 5.23 (d, *J* = 6.0 Hz, 1H), 3.74 (s, 3H), 3.59 (s, 3H), 3.22 (s, 3H).

**<sup>13</sup>C{<sup>1</sup>H} NMR** (100 MHz, CDCl<sub>3</sub>) δ 166.2, 143.0, 141.9, 139.1, 138.3, 134.3, 128.8, 128.6, 127.0, 123.0, 119.8, 116.6, 103.3, 102.1, 52.1, 42.5, 38.7, 32.9.

**HRMS** (ESI-TOF) *m/z*: [M+Na]<sup>+</sup> calcd for C<sub>21</sub>H<sub>20</sub>N<sub>2</sub>NaO<sub>2</sub><sup>+</sup> 355.1417; found 355.1411.

**IR(neat)**: 2912, 1717, 1633, 1606, 1572, 1494, 1470, 1438, 1416, 1392, 1379, 1323, 1253, 1231, 1195, 1130, 1050, 935, 831, 769, 734, 702, 604, 518 cm<sup>-1</sup>.



## Synthesis of starting materials

### The synthesis of N-benzyl-1-methyl-1*H*-indol-4-amine (**1a**)<sup>[1]</sup>

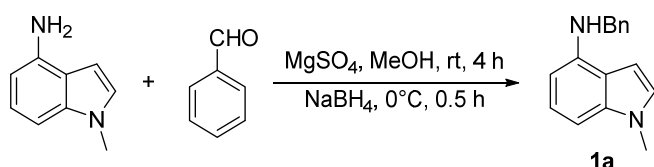

To a solution of 1-methyl-1*H*-indol-4-amine (5.0 g, 34.0 mmol) and benzaldehyde (4.0 g, 37.4 mmol) in MeOH (200 mL) was added MgSO<sub>4</sub> (40.9 g, 340.0 mmol) at room temperature. After 4 hours, the mixture was cooled to 0 °C, then treated with NaBH<sub>4</sub> (1.5 g, 40.8 mmol) in small portions. After stirring at 0 °C for 30 min, the reaction was quenched by water (300 mL), and then extracted with EtOAc (250 mL x 3). The combined organic layers were washed with brine and dried over anhydrous Na<sub>2</sub>SO<sub>4</sub>, filtered, and concentrated in vacuo. The residue was purified by flash chromatography on silica gel (Pet/EtOAc = 100/1, v/v) to afford **1a** as a white solid with 70% yield (5.6 g). The values of the NMR spectra are in accordance with reported literature data<sup>[1]</sup>.

### The synthesis of N,1-dimethyl-1*H*-indol-4-amine (**1b**)

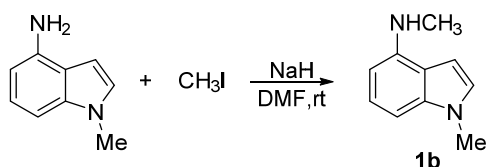

Methyl-1*H*-indol-4-amine (4.39 g, 30.0 mmol) were dissolved in DMF. Then, NaH (2.16 g, 90.0 mmol) was added at 0°C and stirred at 0°C for 30 minutes. After that, iodine-methane (1.87 mL, 30.0 mmol) was added. After the disappearance of 1-methyl-1*H*-indol-4-amine, the reaction was quenched by water (30 mL) and extracted with EtOAc (25 mL x 3). The combined organic layers were washed with brine and dried over anhydrous Na<sub>2</sub>SO<sub>4</sub>, filtered, and concentrated in vacuo. The residue was purified by flash chromatography on silica gel (Pet/EtOAc = 300/1, v/v) to afford **1b** as a white solid with 38% yield (1.8 g)

### The synthesis of N-benzyl-5-chloro-1-methyl-1H-indol-4-amine (1c)

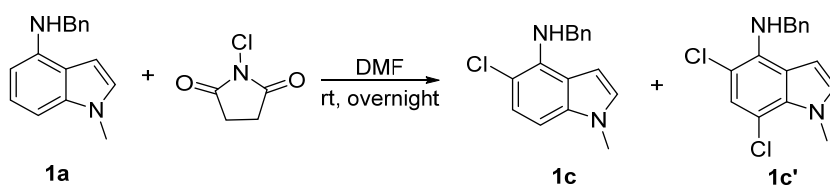

N-Benzyl-1-methyl-1H-indol-4-amine **1a** (1.9 g, 8.0 mmol) and NCS (1.6 g, 12.0 mmol) were added to a flask with DMF (30 mL) and stirred at room temperature overnight. At the end of the reaction, water and ethyl acetate were added to the reaction solution. The organic layer was separated and the aqueous layer was extracted with EtOAc (3×50 mL). The combined organic layers were washed with water (3×50 mL) and dried over anhydrous Na<sub>2</sub>SO<sub>4</sub>. After filtration and removal of the solvents, the resulted residue was purified by silica gel column chromatography using Pet/EtOAc system (Pet/EtOAc = 500/1, v/v) to afford products **1c** and **1c'**.

### The synthesis of *N*-benzyl-1,3-dimethyl-1*H*-indol-4-amine (**1d**)

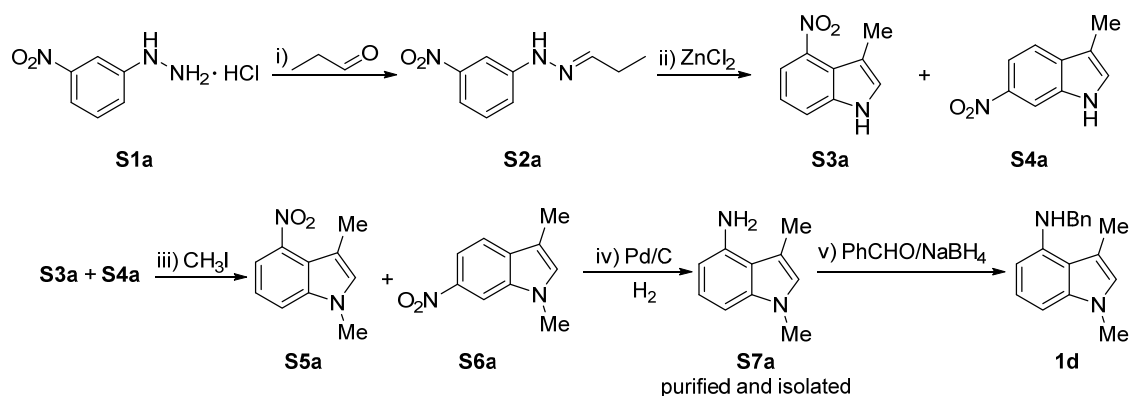

i) To a solution of 3-nitrophenylhydrazine hydrochloride **S1a** (3.8 g, 20 mmol) in EtOH (100 mL) was added Et<sub>3</sub>N (3.3 mL, 24 mmol) at room temperature. After 0.5 h, acetic acid was added to the reaction solution to adjust the pH to 6, and then n-propanal was added and stirred at room temperature for 3 h. Then, the reaction mixture was poured into ice water. The precipitation was then filtered, separated, washed with water and dried by air to afford **S2a**.

ii) Compound **S2a** (2.7 g, 14.0 mmol) was dissolved in toluene. Then, zinc chloride (5.7 g, 42.0 mmol) was added to the reaction solution and stirred overnight at 100°C. After the disappearance of **S2a**, the reaction mixture was cooled to room temperature, and the solvent was removed under reduced pressure. Then, water was added, and the reaction mixture was extracted with EtOAc (25 mL x 3). The combined organic layers were washed with brine and dried over anhydrous Na<sub>2</sub>SO<sub>4</sub>, filtered and vacuum concentration results in a mixture that was directly used in the next step. [Note: **S3a** and **S4a** were difficult to separate because the polarity was too close.]

iii) Compounds (**S3a** + **S4a**) (1.9 g, 11.0 mmol) were dissolved in DMF. Then, NaH (0.8 g, 33.0 mmol) was added at 0°C and stirred at 0°C for 30 minutes. After that, iodine-methane (1.4 mL, 22.0 mmol) was added. After the disappearance of **S3a** and **S4a**, the reaction was quenched by water (30 mL) and extracted with EtOAc (25 mL x 3). The combined organic layers were washed with brine and dried over anhydrous Na<sub>2</sub>SO<sub>4</sub>, filtered and vacuum concentration results in a mixture that is directly used in the next step.

iv) Compounds (**S5a** + **S6a**) (1.6 g, 8.4 mmol) were dissolved in EtOH. Then, Pd/C (1.8 g, 16.8 mmol) was added and the reaction was stirred under H<sub>2</sub> gas at room temperature overnight. After the reaction was complete, the reaction mixture was filtered and concentrated. The residue was purified by flash chromatography on silica gel (Pet/EtOAc = 500/1, v/v) to afford the product **S7a**.

v) Compound **S7a** (5.0 g, 34.0 mmol) [After many accumulations], benzaldehyde (3.8 mL, 37.4 mmol), and MgSO<sub>4</sub> (41.0 g, 340 mmol) were dissolved in MeOH (150 mL), and the reaction was stirred at room temperature for 4 h. Then, the reaction mixture was cooled to 0 °C and treated with NaBH<sub>4</sub> (1.5 g, 40.8 mmol). After stirring at 0 °C for another 30 min, the reaction was quenched by water (30 mL), and then extracted with EtOAc (25 mL x 3). The combined organic layers were washed with brine and dried over anhydrous Na<sub>2</sub>SO<sub>4</sub>, filtered, and concentrated in vacuo. The residue was purified by flash chromatography on silica gel (Pet/EtOAc = 400/1, v/v) to afford product **1d** as a white solid with 68% yield (5.8 g).

**N-Benzyl-1-methyl-1H-indol-4-amine (1a)**

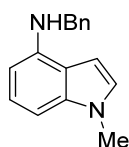

White solid. m.p. = 74.1 – 76.4 °C.

R<sub>f</sub> = 0.35 (Pet/EtOAc, 8/1, v/v).

<sup>1</sup>H NMR (400 MHz, CDCl<sub>3</sub>) δ 7.48 (d, *J* = 7.6 Hz, 2H), 7.44 – 7.37 (m, 2H), 7.36 – 7.30 (m, 1H), 7.13 (t, *J* = 8.0 Hz, 1H), 6.98 (d, *J* = 3.2 Hz, 1H), 6.82 (d, *J* = 8.0 Hz, 1H), 6.43 (dd, *J* = 3.2, 0.8 Hz, 1H), 6.35 (d, *J* = 7.6 Hz, 1H), 4.54 (s, 2H), 4.34 (s, 1H), 3.78 (s, 3H).

<sup>13</sup>C{<sup>1</sup>H} NMR (100 MHz, CDCl<sub>3</sub>) δ 141.5, 139.9, 137.5, 128.7, 127.7, 127.3, 126.7, 123.2, 117.2, 99.9, 99.5, 97.1, 48.5, 33.1.

**N,1-dimethyl-1H-indol-4-amine (1b)**

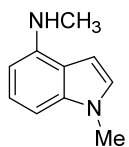

Yellow solid. m.p. = 86.1 – 87.3 °C.

R<sub>f</sub> = 0.29 (Pet/EtOAc, 8/1, v/v).

<sup>1</sup>H NMR (600 MHz, CDCl<sub>3</sub>) δ 7.15 (t, *J* = 7.8 Hz, 1H), 6.94 (d, *J* = 3.6 Hz, 1H), 6.77 (d, *J* = 7.8 Hz, 1H), 6.37 (d, *J* = 3.0 Hz, 1H), 6.30 (d, *J* = 7.2 Hz, 1H), 4.00 (s, 1H), 3.76 (s, 3H), 3.00 (s, 3H).

<sup>13</sup>C{<sup>1</sup>H} (150 MHz, CDCl<sub>3</sub>) δ 142.8, 137.4, 126.6, 123.2, 117.3, 99.7, 98.7, 97.0, 33.2, 31.0.

HRMS (ESI-TOF) m/z: [M+H]<sup>+</sup> calcd for C<sub>10</sub>H<sub>13</sub>N<sub>2</sub><sup>+</sup> 161.1073; found 161.1069.

**IR(neat):** 3418, 2901, 1587, 1499, 1411, 1398, 1351, 1279, 1161, 1078, 1053, 778, 732, 707  $\text{cm}^{-1}$ .

**N-Benzyl-5-chloro-1-methyl-1H-indol-4-amine (1c)**

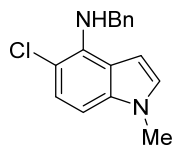

White solid. m.p. = 96.5 – 106.3 °C.

$R_f$  = 0.42 (Pet/EtOAc, 8/1, v/v).

**$^1\text{H}$  NMR** (600 MHz,  $\text{CDCl}_3$ )  $\delta$  7.43 (d,  $J$  = 7.8 Hz, 2H), 7.36 (t,  $J$  = 7.2 Hz, 2H), 7.29 (d,  $J$  = 7.2 Hz, 1H), 7.14 (d,  $J$  = 8.4 Hz, 1H), 6.91 (d,  $J$  = 3.0 Hz, 1H), 6.71 (d,  $J$  = 8.4 Hz, 1H), 6.56 (d,  $J$  = 3.6 Hz, 1H), 4.81 (s, 2H), 4.75 (s, 1H), 3.71 (s, 3H).

**$^{13}\text{C}\{^1\text{H}\}$  NMR** (150 MHz,  $\text{CDCl}_3$ )  $\delta$  140.5, 138.1, 137.4, 128.8, 127.6, 127.5, 127.4, 123.1, 118.1, 110.4, 100.7, 100.4, 50.9, 33.2.

**HRMS** (ESI-TOF)  $m/z$ :  $[\text{M}+\text{H}]^+$  calcd for  $\text{C}_{16}\text{H}_{16}\text{ClN}_2^+$  271.0997; found 271.0995.

**IR(neat):** 2924, 1726, 1597, 1495, 1515, 1451, 1398, 1293, 1230, 1070, 781, 734, 699, 676  $\text{cm}^{-1}$ .

**N-Benzyl-3-chloro-1-methyl-1H-indol-4-amine (1c')**

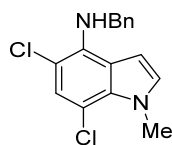

White solid. m.p. = 84.4 – 87.7 °C.

$R_f$  = 0.48 (Pet/EtOAc, 8/1, v/v).

**$^1\text{H}$  NMR** (600 MHz,  $\text{CDCl}_3$ )  $\delta$  7.39 (d,  $J$  = 7.8 Hz, 2H), 7.35 (t,  $J$  = 7.2 Hz, 2H), 7.28 (t,  $J$  = 7.2 Hz, 1H), 7.09 (s, 1H), 6.86 (d,  $J$  = 3.0 Hz, 1H), 6.54 (d,  $J$  = 3.0 Hz, 1H), 4.70 (s, 2H), 4.57 (s, 1H), 4.08 (s, 3H).

**$^{13}\text{C}\{^1\text{H}\}$  NMR** (150 MHz,  $\text{CDCl}_3$ )  $\delta$  140.2, 137.2, 132.3, 130.5, 128.8, 127.53, 127.45, 123.7, 121.6, 110.8, 107.4, 100.6, 51.4, 37.0.

**HRMS** (ESI-TOF)  $m/z$ :  $[\text{M}+\text{H}]^+$  calcd for  $\text{C}_{16}\text{H}_{15}\text{Cl}_2\text{N}_2^+$  305.0607; found 305.0601.

**IR(neat):** 3400, 1567, 1508, 1492, 1443, 1427, 1357, 1338, 1311, 1287, 1252, 1042, 957, 845, 798, 738, 718, 705, 695  $\text{cm}^{-1}$ .

**N-Benzyl-1,3-dimethyl-1H-indol-4-amine (1d)**

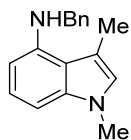

White solid. m.p. = 64.1 – 65.4 °C.

$R_f$  = 0.29 (Pet/EtOAc, 8/1, v/v).

$^1\text{H NMR}$  (400 MHz,  $\text{CDCl}_3$ )  $\delta$  7.51 (d,  $J$  = 7.2 Hz, 2H), 7.46-7.40 (m, 2H), 7.39-7.32 (m, 1H), 7.11 (t,  $J$  = 8.0 Hz, 1H), 6.75 (d,  $J$  = 8.0 Hz, 1H), 6.69 (s, 1H), 6.29 (d,  $J$  = 7.6 Hz, 1H), 4.90 (s, 1H), 4.52 (s, 2H), 3.70 (s, 3H), 2.60 (s, 3H).

$^{13}\text{C}\{^1\text{H}\}$  NMR (100 MHz,  $\text{CDCl}_3$ )  $\delta$  143.6, 134.0, 138.5, 128.7, 127.5, 127.2, 125.0, 123.2, 116.2, 109.1, 99.9, 99.3, 48.5, 32.7, 13.1.

HRMS (ESI-TOF)  $m/z$ :  $[\text{M}+\text{H}]^+$  calcd for  $\text{C}_{17}\text{H}_{19}\text{N}_2^+$  251.1543; found 251.1537.

IR(neat): 3427, 1607, 1581, 1550, 1503, 1452, 1418, 1342, 1279, 1166, 1070, 769, 730, 695  $\text{cm}^{-1}$ .

### 3-Methyl-4-nitro-1H-indole (S3a)

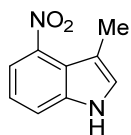

Yellow solid. m.p. = 135.5 – 141.6 °C.

$R_f$  = 0.05 (Pet/EtOAc, 8/1, v/v).

$^1\text{H NMR}$  (600 MHz,  $\text{CDCl}_3$ )  $\delta$  8.37 (s, 1H), 7.82 (d,  $J$  = 7.8 Hz, 1H), 7.61 (d,  $J$  = 7.8 Hz, 1H), 7.22 – 7.18 (m, 2H), 2.42 (s, 3H).

$^{13}\text{C}\{^1\text{H}\}$  NMR (150 MHz,  $\text{CDCl}_3$ )  $\delta$  127.01, 120.75, 120.1, 117.36, 117.01, 111.84, 13.21.

HRMS (ESI-TOF)  $m/z$ :  $[\text{M}+\text{Na}]^+$  calcd for  $\text{C}_9\text{H}_8\text{N}_2\text{NaO}_2^+$  199.0478; found 199.0475.

IR(neat): 3354, 2921, 2852, 1528, 1510, 1465, 1353, 1315, 1282, 1087, 1055, 979, 798, 786, 730  $\text{cm}^{-1}$ .

### 1,3-Dimethyl-4-nitro-1H-indole (S5a)

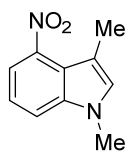

Yellow solid. m.p. = 102.1 – 104.2 °C.

$R_f$  = 0.52 (Pet/EtOAc, 8/1, v/v).

**$^1\text{H}$  NMR** (600 MHz,  $\text{CDCl}_3$ )  $\delta$  7.81 (d,  $J = 7.8$  Hz, 1H), 7.53 (d,  $J = 7.8$  Hz, 1H), 7.22 (t,  $J = 7.8$  Hz, 1H), 7.04 (s, 1H), 3.80 (s, 3H), 2.39 (s, 3H).

**$^{13}\text{C}\{^1\text{H}\}$  NMR** (150 MHz,  $\text{CDCl}_3$ )  $\delta$  132.0, 120.4, 120.2, 116.8, 115.0, 110.1, 33.1, 13.0.

**HRMS** (ESI-TOF)  $m/z$ :  $[\text{M}+\text{Na}]^+$  calcd for  $\text{C}_{10}\text{H}_{10}\text{N}_2\text{NaO}_2^+$  213.0634; found 213.0626.

**IR(neat)**: 2922, 2854, 1542, 1514, 1473, 1375, 1350, 1328, 1293, 1211, 1060, 920, 794, 737, 632  $\text{cm}^{-1}$ .

## X-ray data

**Figure S2.** X-Ray crystal structure of (*S*)-**3af** (The crystal was obtained by slow evaporation of (*S*)-**3af** in a mixture of Pet/EtOAc/CH<sub>2</sub>Cl<sub>2</sub>). (CCDC:2225438):

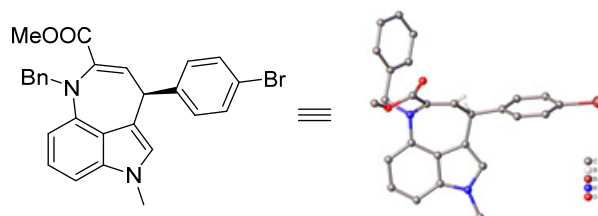

**Table S1** Crystal data and structure refinement for (*S*)-**3af**.

|                                             |                                                                 |
|---------------------------------------------|-----------------------------------------------------------------|
| Identification code                         | ( <i>S</i> )- <b>3af</b>                                        |
| Empirical formula                           | C <sub>27</sub> H <sub>23</sub> BrN <sub>2</sub> O <sub>2</sub> |
| Formula weight                              | 487.40                                                          |
| Temperature/K                               | 293                                                             |
| Crystal system                              | orthorhombic                                                    |
| Space group                                 | P2 <sub>1</sub> 2 <sub>1</sub> 2 <sub>1</sub>                   |
| a/Å                                         | 9.5102(2)                                                       |
| b/Å                                         | 10.95350(10)                                                    |
| c/Å                                         | 22.7080(4)                                                      |
| α/°                                         | 90                                                              |
| β/°                                         | 90                                                              |
| γ/°                                         | 90                                                              |
| Volume/Å <sup>3</sup>                       | 2365.49(7)                                                      |
| Z                                           | 4                                                               |
| ρ <sub>calc</sub> /cm <sup>3</sup>          | 1.3685                                                          |
| μ/mm <sup>-1</sup>                          | 2.570                                                           |
| F(000)                                      | 999.9                                                           |
| Crystal size/mm <sup>3</sup>                | 0.15 × 0.08 × 0.06                                              |
| Radiation                                   | Cu Kα (λ = 1.54184)                                             |
| 2θ range for data collection/°              | 7.78 to 143.1                                                   |
| Index ranges                                | -11 ≤ h ≤ 11, -13 ≤ k ≤ 13, -27 ≤ l ≤ 22                        |
| Reflections collected                       | 35613                                                           |
| Independent reflections                     | 4590 [R <sub>int</sub> = 0.0485, R <sub>sigma</sub> = 0.0253]   |
| Data/restraints/parameters                  | 4590/0/291                                                      |
| Goodness-of-fit on F <sup>2</sup>           | 1.034                                                           |
| Final R indexes [I ≥ 2σ (I)]                | R <sub>1</sub> = 0.0409, wR <sub>2</sub> = 0.1017               |
| Final R indexes [all data]                  | R <sub>1</sub> = 0.0457, wR <sub>2</sub> = 0.1031               |
| Largest diff. peak/hole / e Å <sup>-3</sup> | 0.66/-0.71                                                      |
| Flack parameter                             | -0.01(2)                                                        |



**Figure S3.** X-Ray crystal structure of **4af** (The crystal was obtained by slow evaporation of **4af** in a mixture of Pet/EtOAc/CH<sub>2</sub>Cl<sub>2</sub>) (CCDC:2225440):

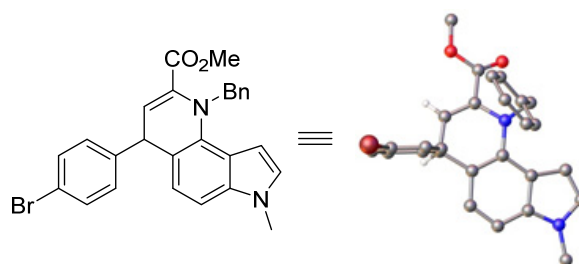

**Table S2 Crystal data and structure refinement for 4af.**

|                                             |                                                                 |
|---------------------------------------------|-----------------------------------------------------------------|
| Identification code                         | <b>4af</b>                                                      |
| Empirical formula                           | C <sub>27</sub> H <sub>23</sub> BrN <sub>2</sub> O <sub>2</sub> |
| Formula weight                              | 487.38                                                          |
| Temperature/K                               | 293                                                             |
| Crystal system                              | triclinic                                                       |
| Space group                                 | P-1                                                             |
| a/Å                                         | 9.4265(4)                                                       |
| b/Å                                         | 10.3316(5)                                                      |
| c/Å                                         | 13.1925(5)                                                      |
| α/°                                         | 81.151(4)                                                       |
| β/°                                         | 78.346(3)                                                       |
| γ/°                                         | 64.360(4)                                                       |
| Volume/Å <sup>3</sup>                       | 1131.22(9)                                                      |
| Z                                           | 2                                                               |
| ρ <sub>calc</sub> /cm <sup>3</sup>          | 1.431                                                           |
| μ/mm <sup>-1</sup>                          | 2.687                                                           |
| F(000)                                      | 500.0                                                           |
| Crystal size/mm <sup>3</sup>                | 0.16 × 0.09 × 0.05                                              |
| Radiation                                   | CuKα (λ = 1.54184)                                              |
| 2θ range for data collection/°              | 6.86 to 143.384                                                 |
| Index ranges                                | -11 ≤ h ≤ 11, -12 ≤ k ≤ 12, -11 ≤ l ≤ 16                        |
| Reflections collected                       | 9034                                                            |
| Independent reflections                     | 4301 [R <sub>int</sub> = 0.0205, R <sub>sigma</sub> = 0.0280]   |
| Data/restraints/parameters                  | 4301/0/291                                                      |
| Goodness-of-fit on F <sup>2</sup>           | 1.075                                                           |
| Final R indexes [I >= 2σ (I)]               | R <sub>1</sub> = 0.0405, wR <sub>2</sub> = 0.0972               |
| Final R indexes [all data]                  | R <sub>1</sub> = 0.0474, wR <sub>2</sub> = 0.1010               |
| Largest diff. peak/hole / e Å <sup>-3</sup> | 0.48/-0.68                                                      |

**Figure S4.** X-Ray crystal structure of **1c** (The crystal was obtained by slow evaporation of **1c** in a mixture of Pet/EtOAc/CH<sub>2</sub>Cl<sub>2</sub>) (CCDC:2225441):

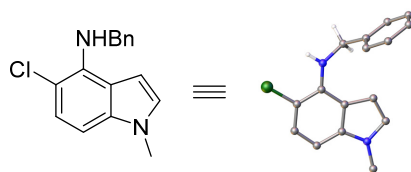

**Table S3** Crystal data and structure refinement for **1c**.

|                                             |                                                               |
|---------------------------------------------|---------------------------------------------------------------|
| Identification code                         | <b>1c</b>                                                     |
| Empirical formula                           | C <sub>16</sub> H <sub>15</sub> ClN <sub>2</sub>              |
| Formula weight                              | 270.75                                                        |
| Temperature/K                               | 293                                                           |
| Crystal system                              | monoclinic                                                    |
| Space group                                 | P2 <sub>1</sub> /n                                            |
| a/Å                                         | 10.2358(3)                                                    |
| b/Å                                         | 5.6225(2)                                                     |
| c/Å                                         | 24.3001(8)                                                    |
| α/°                                         | 90                                                            |
| β/°                                         | 101.373(3)                                                    |
| γ/°                                         | 90                                                            |
| Volume/Å <sup>3</sup>                       | 1371.03(8)                                                    |
| Z                                           | 4                                                             |
| ρ <sub>calc</sub> /g/cm <sup>3</sup>        | 1.312                                                         |
| μ/mm <sup>-1</sup>                          | 2.344                                                         |
| F(000)                                      | 568.0                                                         |
| Crystal size/mm <sup>3</sup>                | 0.15 × 0.08 × 0.05                                            |
| Radiation                                   | CuKα (λ = 1.54184)                                            |
| 2θ range for data collection/°              | 7.422 to 143.038                                              |
| Index ranges                                | -12 ≤ h ≤ 12, -6 ≤ k ≤ 3, -18 ≤ l ≤ 29                        |
| Reflections collected                       | 5865                                                          |
| Independent reflections                     | 2614 [R <sub>int</sub> = 0.0396, R <sub>sigma</sub> = 0.0380] |
| Data/restraints/parameters                  | 2614/0/177                                                    |
| Goodness-of-fit on F <sup>2</sup>           | 1.059                                                         |
| Final R indexes [I > 2σ (I)]                | R <sub>1</sub> = 0.0788, wR <sub>2</sub> = 0.2180             |
| Final R indexes [all data]                  | R <sub>1</sub> = 0.0882, wR <sub>2</sub> = 0.2348             |
| Largest diff. peak/hole / e Å <sup>-3</sup> | 0.31/-0.54                                                    |

**Figure S5.** X-Ray crystal structure of **1c'** (The crystal was obtained by slow evaporation of **1c'** in a mixture of Pet/EtOAc/CH<sub>2</sub>Cl<sub>2</sub>) (CCDC:2225450):

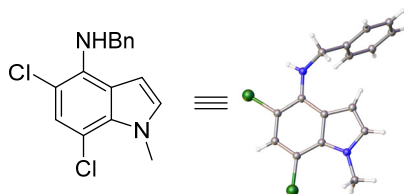

**Table S4** Crystal data and structure refinement for **1c'**.

|                                             |                                                                |
|---------------------------------------------|----------------------------------------------------------------|
| Identification code                         | <b>1c'</b>                                                     |
| Empirical formula                           | C <sub>16</sub> H <sub>14</sub> Cl <sub>2</sub> N <sub>2</sub> |
| Formula weight                              | 305.19                                                         |
| Temperature/K                               | 293                                                            |
| Crystal system                              | monoclinic                                                     |
| Space group                                 | P2 <sub>1</sub> /c                                             |
| a/Å                                         | 11.5101(4)                                                     |
| b/Å                                         | 5.3886(2)                                                      |
| c/Å                                         | 23.0853(8)                                                     |
| α/°                                         | 90                                                             |
| β/°                                         | 95.195(3)                                                      |
| γ/°                                         | 90                                                             |
| Volume/Å <sup>3</sup>                       | 1425.95(9)                                                     |
| Z                                           | 4                                                              |
| ρ <sub>calc</sub> /g/cm <sup>3</sup>        | 1.422                                                          |
| μ/mm <sup>-1</sup>                          | 4.004                                                          |
| F(000)                                      | 632.0                                                          |
| Crystal size/mm <sup>3</sup>                | 0.15 × 0.06 × 0.04                                             |
| Radiation                                   | CuKα (λ = 1.54184)                                             |
| 2θ range for data collection/°              | 7.69 to 142.674                                                |
| Index ranges                                | -13 ≤ h ≤ 14, -6 ≤ k ≤ 2, -28 ≤ l ≤ 27                         |
| Reflections collected                       | 5399                                                           |
| Independent reflections                     | 2718 [R <sub>int</sub> = 0.0219, R <sub>sigma</sub> = 0.0344]  |
| Data/restraints/parameters                  | 2718/0/186                                                     |
| Goodness-of-fit on F <sup>2</sup>           | 1.044                                                          |
| Final R indexes [I >= 2σ (I)]               | R <sub>1</sub> = 0.0450, wR <sub>2</sub> = 0.1199              |
| Final R indexes [all data]                  | R <sub>1</sub> = 0.0532, wR <sub>2</sub> = 0.1271              |
| Largest diff. peak/hole / e Å <sup>-3</sup> | 0.26/-0.31                                                     |

**Figure S6.** X-Ray crystal structure of **1d** (The crystal was obtained by slow evaporation of **1d** in a mixture of Pet/EtOAc/CH<sub>2</sub>Cl<sub>2</sub>) (CCDC:2225454):

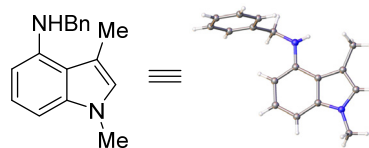

**Table S5 Crystal data and structure refinement for 1d.**

|                                             |                                                               |
|---------------------------------------------|---------------------------------------------------------------|
| Identification code                         | <b>1d</b>                                                     |
| Empirical formula                           | C <sub>17</sub> H <sub>18</sub> N <sub>2</sub>                |
| Formula weight                              | 250.33                                                        |
| Temperature/K                               | 293                                                           |
| Crystal system                              | monoclinic                                                    |
| Space group                                 | P2 <sub>1</sub> /n                                            |
| a/Å                                         | 10.7952(4)                                                    |
| b/Å                                         | 5.4138(2)                                                     |
| c/Å                                         | 24.3400(8)                                                    |
| α/°                                         | 90                                                            |
| β/°                                         | 99.872(4)                                                     |
| γ/°                                         | 90                                                            |
| Volume/Å <sup>3</sup>                       | 1401.44(9)                                                    |
| Z                                           | 4                                                             |
| ρ <sub>calc</sub> /cm <sup>3</sup>          | 1.186                                                         |
| μ/mm <sup>-1</sup>                          | 0.538                                                         |
| F(000)                                      | 536.0                                                         |
| Crystal size/mm <sup>3</sup>                | 0.15 × 0.07 × 0.05                                            |
| Radiation                                   | CuKα (λ = 1.54184)                                            |
| 2θ range for data collection/°              | 7.374 to 143.044                                              |
| Index ranges                                | -13 ≤ h ≤ 13, -6 ≤ k ≤ 4, -18 ≤ l ≤ 29                        |
| Reflections collected                       | 5862                                                          |
| Independent reflections                     | 2654 [R <sub>int</sub> = 0.0336, R <sub>sigma</sub> = 0.0455] |
| Data/restraints/parameters                  | 2654/0/178                                                    |
| Goodness-of-fit on F <sup>2</sup>           | 1.162                                                         |
| Final R indexes [I ≥ 2σ (I)]                | R <sub>1</sub> = 0.0672, wR <sub>2</sub> = 0.1921             |
| Final R indexes [all data]                  | R <sub>1</sub> = 0.0995, wR <sub>2</sub> = 0.2020             |
| Largest diff. peak/hole / e Å <sup>-3</sup> | 0.16/-0.21                                                    |

## Optimization study

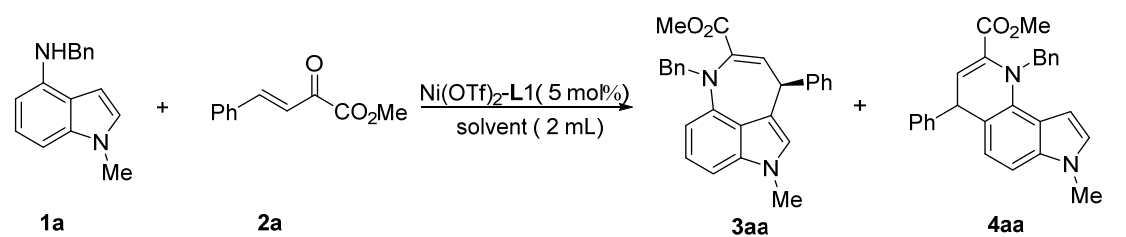

| Entry | <b>1a</b> : <b>2a</b> | Solvent           | Additive       | t (h) | Conv. <sup>b</sup> (%) | <b>3aa</b> / <b>4aa</b> <sup>b</sup> | ee ( <b>3aa</b> ) <sup>c</sup> (%) |
|-------|-----------------------|-------------------|----------------|-------|------------------------|--------------------------------------|------------------------------------|
| 1     | 1.5: 1                | PhMe              | -              | 8     | 38                     | 81:19                                | 66                                 |
| 2     | 1.5: 1                | PhCF <sub>3</sub> | -              | 6     | 86                     | 86:14                                | 89                                 |
| 3     | 1.5: 1                | PhCF <sub>3</sub> | 3 Å MS (20 mg) | 8     | 88                     | 86:14                                | 89                                 |
| 4     | 1.5: 1                | PhCF <sub>3</sub> | 4 Å MS (20 mg) | 6     | 91                     | 87:13                                | 76                                 |
| 5     | 1.5: 1                | PhCF <sub>3</sub> | 5 Å MS (20 mg) | 6     | >95                    | 91:9                                 | 90                                 |
| 6     | 1.5: 1                | DCE               | 5 Å MS (20 mg) | 6     | 94                     | 86:14                                | 72                                 |
| 7     | 1.5: 1                | mesitylene        | 5 Å MS (20 mg) | 6     | 64                     | 89:11                                | 86                                 |
| 8     | 1.3: 1                | PhCF <sub>3</sub> | 5 Å MS (20 mg) | 6     | >95                    | 91:9                                 | 91                                 |
| 9     | 2.0: 1                | PhCF <sub>3</sub> | 5 Å MS (20 mg) | 6     | >95                    | 91:9                                 | 90                                 |

<sup>a</sup>Reaction conditions: indole **1a**, **2a** (19.0 mg, 0.1 mmol), **L1** (3.4 mg, 0.005 mmol, 5 mol%),  $\text{Ni}(\text{OTf})_2$  (1.78 mg, 0.005 mmol, 5 mol%) in solvent (2 mL) for 6-8 h. <sup>b</sup>Determined by <sup>1</sup>H NMR spectra of the crude product. <sup>c</sup>Determined by chiral HPLC analysis.

## Mechanism study

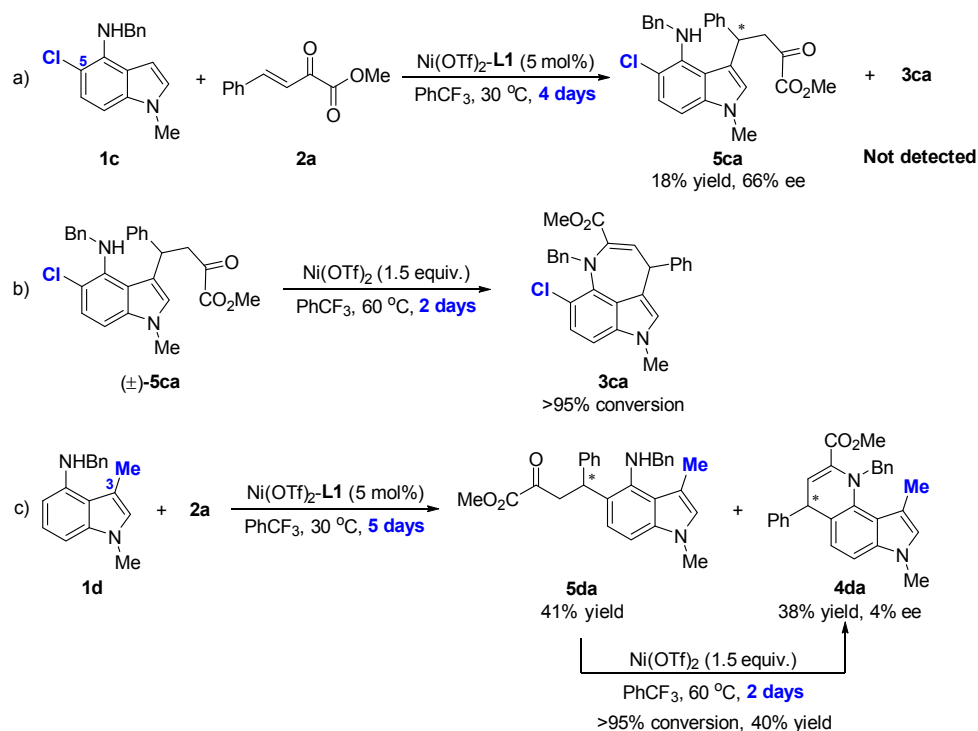

a) In a test tube, **L1** and  $\text{Ni}(\text{OTf})_2$  (5 mol%, 1:1) were added. Then  $\beta,\gamma$ -unsaturated  $\alpha$ -ketoester **2a** (0.1 mmol) and  $\text{PhCF}_3$  (2.0 mL) were added at air atmosphere. After stirred at 30 °C for 0.5 hour, the N-benzyl-5-chloro-1-methyl-1*H*-indol-4-amine **1c** (1.3 equiv., 35.0 mg) was added. The reaction mixture was stirred 4 d at 30 °C.

b) In a test tube,  $\text{Ni}(\text{OTf})_2$  (1.5 equiv) and  $\text{PhCF}_3$  were added at air atmosphere. After stirred at 60 °C for 24 hour, product **5ca** (13.8 mg, 0.03 mmol) could be completely converted into **3ca** (**Figure S7**). Finally, product **3ca** was purified directly by flash column chromatography (Pet/EtOAc, 100/1, v/v).

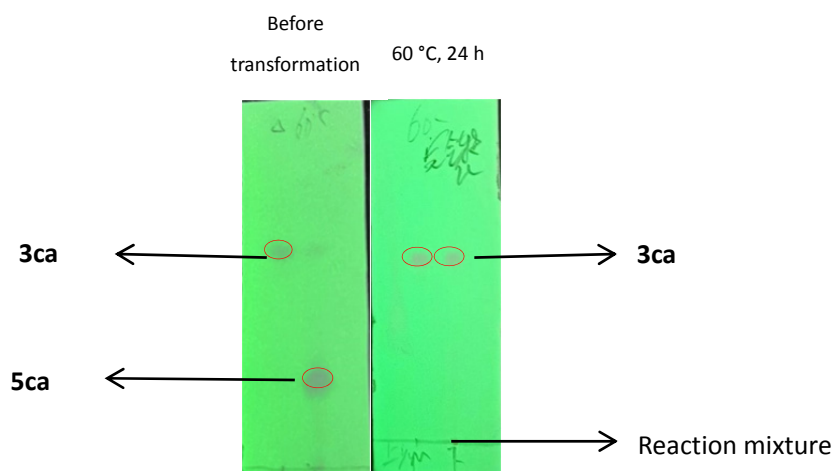

**Figure S7.** Pet/EtOAc, 5/1, v/v

c) In a test tube, **L1** and Ni(OTf)<sub>2</sub> (5 mol%, 1:1) were added. Then β,γ-unsaturated α-ketoester **2a** (0.1 mmol) and PhCF<sub>3</sub> (2.0 mL) were added at air atmosphere. After stirred at 30 °C for 0.5 hour, the N-benzyl-1,3-dimethyl-1*H*-indol-4-amine **1d** (1.3 equiv., 32.5 mg) was added. The reaction mixture was stirred at 30 °C 5 d. After flash column chromatography (Pet/EtOAc, 100/1, v/v), the pure product **4da** was obtained. Then Ni(OTf)<sub>2</sub> (1.5 equiv) and PhCF<sub>3</sub> were added to **5da** at air atmosphere. After stirred at 60 °C for 2d, product **5da** could be converted into **4da** (>95% conversion, 40% yield).

**Methyl 1-benzyl-9-chloro-6-methyl-4-phenyl-4,6-dihydro-1*H*-azepino[4,3,2-*cd*]indole-2-carboxylate (3ca)**

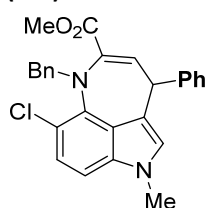

Yellow solid, m.p. = 144.4 – 149.5 °C.

R<sub>f</sub> = 0.35 (Pet/EtOAc, 8/1, v/v).

<sup>1</sup>H NMR (600 MHz, CDCl<sub>3</sub>) δ 7.37 – 7.26 (m, 6H), 7.23 (d, *J* = 8.4 Hz, 1H), 7.21 – 7.17 (m, 2H), 7.14 – 7.07 (m, 3H), 6.88 (d, *J* = 8.6 Hz, 1H), 5.85 (s, 1H), 5.02 (d, *J* = 14.4 Hz, 1H), 4.72 (d, *J* = 14.4 Hz, 1H), 4.20 (d, *J* = 3.6 Hz, 1H), 3.81 (s, 3H), 3.55 (s, 3H).

<sup>13</sup>C{<sup>1</sup>H} NMR (150 MHz, CDCl<sub>3</sub>) δ 166.2, 143.3, 142.2, 139.4, 137.1, 137.0, 136.7, 129.3, 128.8, 128.7, 128.5, 127.5, 127.2, 125.1, 124.8, 124.5, 117.5, 115.8, 105.5, 57.7, 52.3, 42.3, 33.0.

HRMS (ESI-TOF) *m/z*: [M+Na]<sup>+</sup> calcd for C<sub>27</sub>H<sub>23</sub>ClN<sub>2</sub>NaO<sub>2</sub><sup>+</sup> 465.1340; found 465.1338.

IR(neat): 2923, 1709, 1627, 1573, 1478, 1452, 1397, 1303, 1282, 1121, 1076, 1059, 1034, 780, 771, 757, 703 cm<sup>-1</sup>.

**Methyl 4-(4-(benzylamino)-5-chloro-1-methyl-1*H*-indol-3-yl)-2-oxo-4-phenylbutanoate (5ca)**

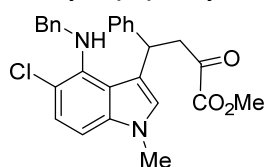

Yellow solid (8.8 mg, 18% yield, 66% ee). m.p. ≥300 °C.

R<sub>f</sub> = 0.085 (Pet/EtOAc, 8/1, v/v).

[α]<sub>D</sub><sup>23</sup> = 5.07 (c = 0.50, CHCl<sub>3</sub>).

**HPLC** CHIRALPAK ODH, n-hexane/2-propanol = 90/10, flow rate 0.8 mL/min,  $\lambda$  = 254 nm, retention time: (minor) = 23.262 min, (major) = 34.773 min.

**$^1\text{H}$  NMR** (600 MHz,  $\text{CDCl}_3$ )  $\delta$  7.41 (d,  $J$  = 7.2 Hz, 2H), 7.39 – 7.35 (m, 2H), 7.33 – 7.29 (m, 1H), 7.24 – 7.12 (m, 7H), 6.92 (d,  $J$  = 9.0 Hz, 1H), 6.76 (s, 1H), 5.27 (t,  $J$  = 7.8 Hz, 1H), 4.23 (dd,  $J$  = 16.8, 13.2 Hz, 2H), 3.78 – 3.66 (m, 7H), 3.51 (dd,  $J$  = 17.4, 7.8 Hz, 1H).

**$^{13}\text{C}\{^1\text{H}\}$  NMR** (150 MHz,  $\text{CDCl}_3$ )  $\delta$  192.5, 161.6, 143.7, 139.8, 139.2, 137.7, 128.7, 128.6, 128.5, 127.9, 127.7, 127.4, 126.8, 123.7, 122.2, 119.3, 117.1, 105.6, 55.3, 53.0, 47.3, 37.9, 33.2.

**HRMS** (ESI-TOF)  $m/z$ :  $[\text{M}+\text{H}]^+$  calcd for  $\text{C}_{27}\text{H}_{26}\text{ClN}_2\text{O}_3^+$  461.1626; found 461.1620.

**IR(neat)**: 2923, 1727, 1603, 1490, 1452, 1413, 1230, 1268, 1063, 976, 783, 752, 699  $\text{cm}^{-1}$ .

**Methyl 1-benzyl-7,9-dimethyl-4-phenyl-4,7-dihydro-1H-pyrrolo[2,3-*h*]quinoline-2-carboxylate (4da)**

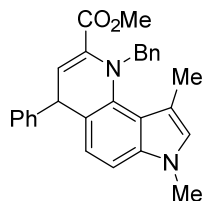

Yellow solid (16.0 mg, 38% yield, 4% ee). m.p. = 67.4 – 75.6 °C.

$R_f$  = 0.40 (Pet/EtOAc, 8/1, v/v).

**HPLC** CHIRALPAK ASH, n-hexane/2-propanol = 90/10, flow rate 0.5 mL/min,  $\lambda$  = 254 nm, retention time: (major) = 10.972 min, (minor) = 13.618 min.

**$^1\text{H}$  NMR** (400 MHz,  $\text{CDCl}_3$ )  $\delta$  7.25 – 7.09 (m, 6H), 6.91 – 6.81 (m, 3H), 6.76 (d,  $J$  = 7.2 Hz, 2H), 6.38 (d,  $J$  = 3.2 Hz, 1H), 6.34 (d,  $J$  = 8.4 Hz, 1H), 4.89 (d,  $J$  = 14.0 Hz, 1H), 4.82 (d,  $J$  = 14.0 Hz, 1H), 3.86 (s, 3H), 3.69 (s, 3H), 2.71 (s, 3H).

**$^{13}\text{C}\{^1\text{H}\}$  NMR** (100 MHz,  $\text{CDCl}_3$ )  $\delta$  165.1, 145.7, 138.1, 137.7, 137.4, 134.8, 129.5, 129.3, 128.5, 128.2, 127.6, 127.5, 126.4, 122.2, 120.5, 110.1, 105.7, 59.6, 52.1, 43.8, 32.9, 12.0.

**HRMS** (ESI-TOF)  $m/z$ :  $[\text{M}+\text{Na}]^+$  calcd for  $\text{C}_{28}\text{H}_{26}\text{N}_2\text{NaO}_2^+$  445.1886; found 445.1881.

**IR(neat)**: 2922, 2852, 1716, 1633, 1449, 1412, 1374, 1316, 1247, 1121, 1056, 1029, 825, 790, 767, 733, 701  $\text{cm}^{-1}$ .



**Methyl-4-(4-(benzylamino)-1,3-dimethyl-1H-indol-5-yl)-2-oxo-4-phenylbutanoate (5da)**

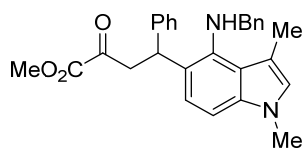

Yellow solid (18.0 mg, 41% yield,). m.p. = 63.2 – 66.7 °C.

R<sub>f</sub> = 0.38 (Pet/EtOAc, 8/1, v/v).

<sup>1</sup>H NMR (400 MHz, CDCl<sub>3</sub>) δ 7.45 (d, *J* = 7.2 Hz, 2H), 7.40 – 7.35 (m, 2H), 7.33 – 7.27 (m, 3H), 7.25 – 7.19 (m, 1H), 7.19 – 7.13 (m, 2H), 7.01 (t, *J* = 8.0 Hz, 1H), 6.64 (d, *J* = 8.4 Hz, 1H), 6.23 (d, *J* = 7.6 Hz, 1H), 5.19 – 5.11 (m, 1H), 4.44 (s, 2H), 3.89-3.76 (m, 1H), 3.75 – 3.60 (m, 4H), 3.43 (s, 3H), 2.52 (s, 3H).

<sup>13</sup>C{<sup>1</sup>H} NMR (100 MHz, CDCl<sub>3</sub>) δ 192.5, 161.0, 143.3, 140.9, 139.9, 138.4, 133.5, 128.8, 127.6, 127.3, 126.9, 126.8, 123.2, 115.7, 107.9, 100.0, 99.7, 77.4, 53.1, 48.6, 42.5, 34.9, 31.0, 12.5.

HRMS (ESI-TOF) *m/z*: [M+K]<sup>+</sup> calcd for C<sub>28</sub>H<sub>28</sub>KN<sub>2</sub>O<sub>3</sub><sup>+</sup> 479.1732; found 479.1731.

IR(neat): 2922, 2852, 1728, 1660, 1632, 1595, 1516, 1451, 1398, 1292, 1234, 1069, 1040, 789, 736, 699 cm<sup>-1</sup>.

## Gram-scale synthesis of **3aa**

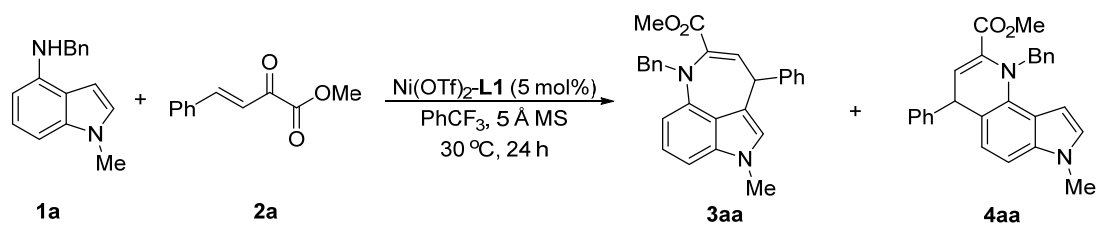

In a 50 mL round bottom flask, a mixture of  $\text{Ni}(\text{OTf})_2$  (17.8 mg, 0.05 mmol, 5.0 mol %), ligand **L1** (3.4 mg, 0.05 mmol, 5.0 mol %), 5 Å MS (200 mg) and  $\beta,\gamma$ -unsaturated  $\alpha$ -ketoester **2a** (190.0 mg, 1.0 mmol) in  $\text{PhCF}_3$  (15 mL) were stirred at room temperature for 30 minutes under the atmosphere. Then indole **1a** (307.0 mg, 1.3 mmol) in  $\text{PhCF}_3$  (5.0 mL) was added. After 24 h, the reaction was complete (monitored by TLC). At the end of the reaction, the reaction mixture was filtered and concentrated, and the residue was purified directly by flash column chromatography (Pet/EtOAc, 500/1~100/1, v/v) as eluent to afford the desired product **3aa** (373.0 mg, 91% yield, 90% ee). Moreover, the crude NMR characterization showed that the conversion rate of substrate **3aa** was greater than 95%, and the ratio of product **3aa** to product **4aa** was 92:8.

## HPLC Spectra

Figure S6. HPLC spectra of **3aa** and **3ap**

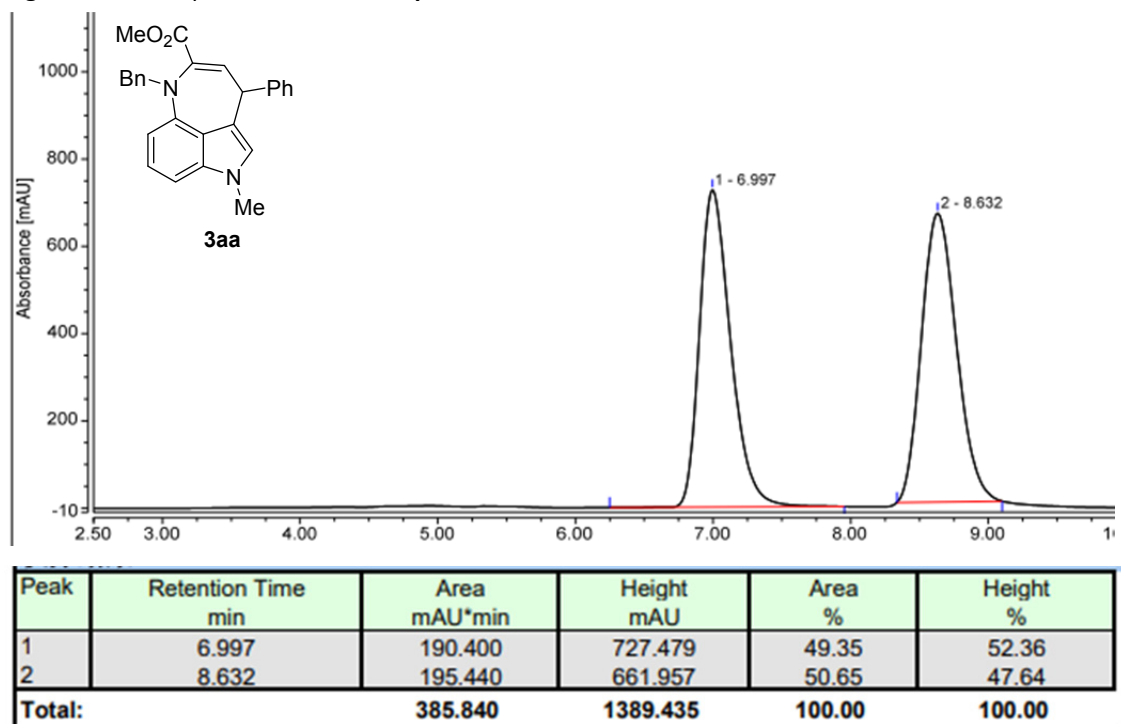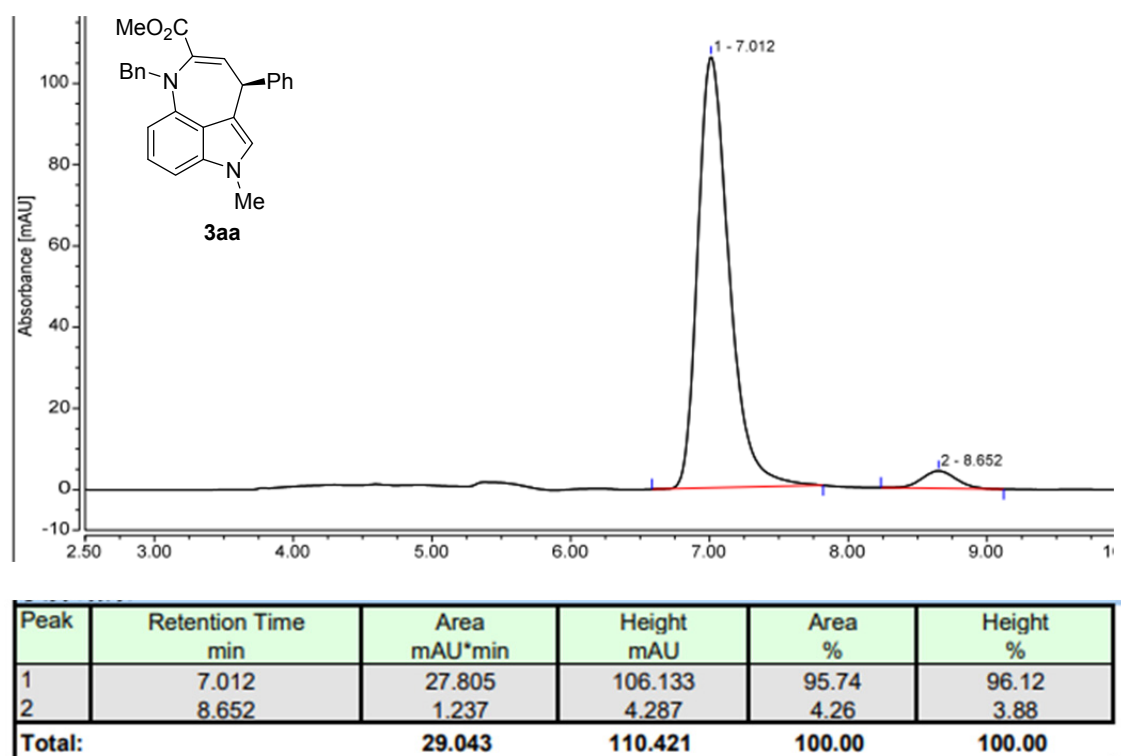

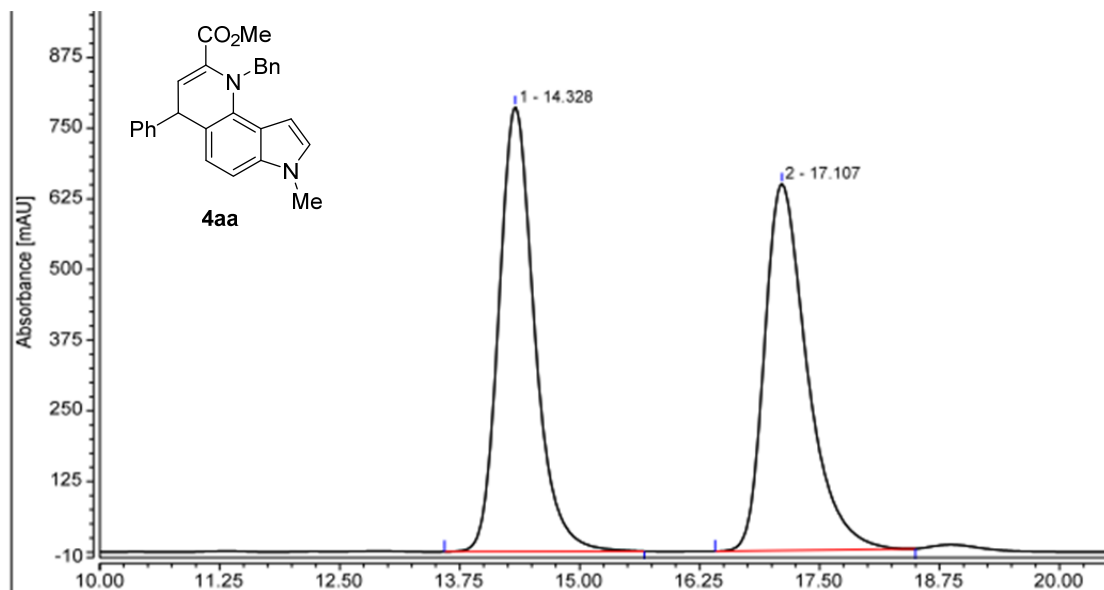

| Peak          | Retention Time<br>min | Area<br>mAU*min | Height<br>mAU   | Area<br>%     | Height<br>%   |
|---------------|-----------------------|-----------------|-----------------|---------------|---------------|
| 1             | 14.328                | 339.214         | 786.100         | 50.39         | 54.80         |
| 2             | 17.107                | 333.899         | 648.277         | 49.61         | 45.20         |
| <b>Total:</b> |                       | <b>673.112</b>  | <b>1434.377</b> | <b>100.00</b> | <b>100.00</b> |

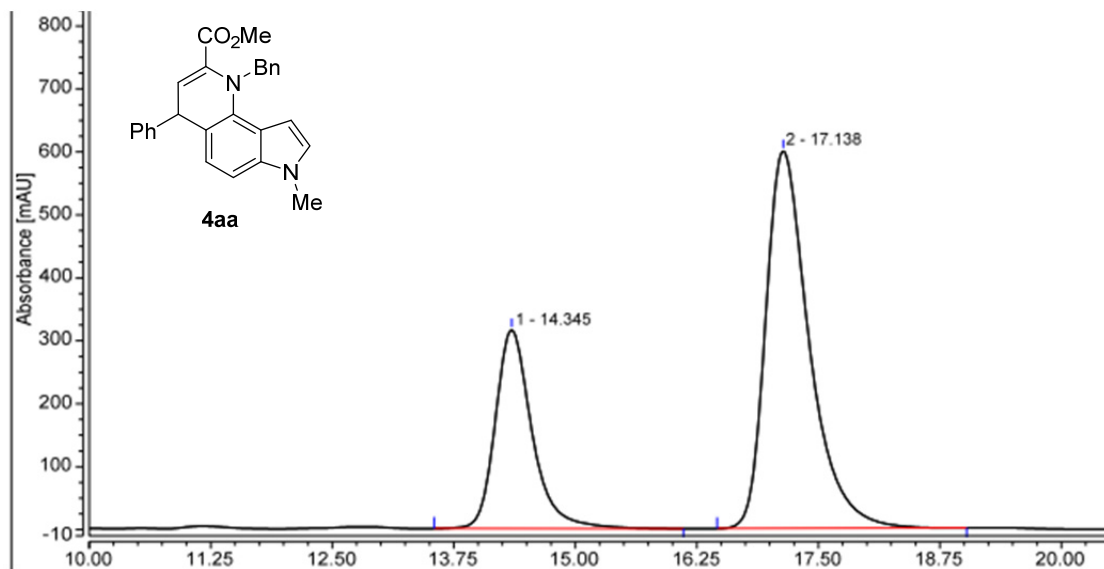

| Peak          | Retention Time<br>min | Area<br>mAU*min | Height<br>mAU  | Area<br>%     | Height<br>%   |
|---------------|-----------------------|-----------------|----------------|---------------|---------------|
| 1             | 14.345                | 138.666         | 315.423        | 30.83         | 34.48         |
| 2             | 17.138                | 311.099         | 599.391        | 69.17         | 65.52         |
| <b>Total:</b> |                       | <b>449.765</b>  | <b>914.813</b> | <b>100.00</b> | <b>100.00</b> |

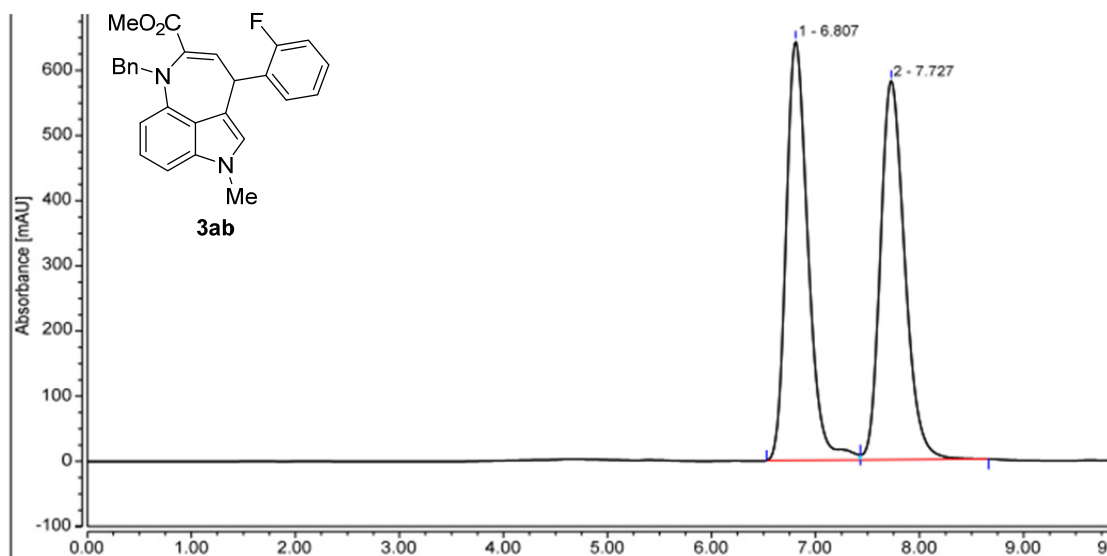

| Peak          | Retention Time min | Area mAU*min   | Height mAU      | Area %        | Height %      |
|---------------|--------------------|----------------|-----------------|---------------|---------------|
| 1             | 6.807              | 156.821        | 643.251         | 49.91         | 52.51         |
| 2             | 7.727              | 157.403        | 581.801         | 50.09         | 47.49         |
| <b>Total:</b> |                    | <b>314.224</b> | <b>1225.052</b> | <b>100.00</b> | <b>100.00</b> |

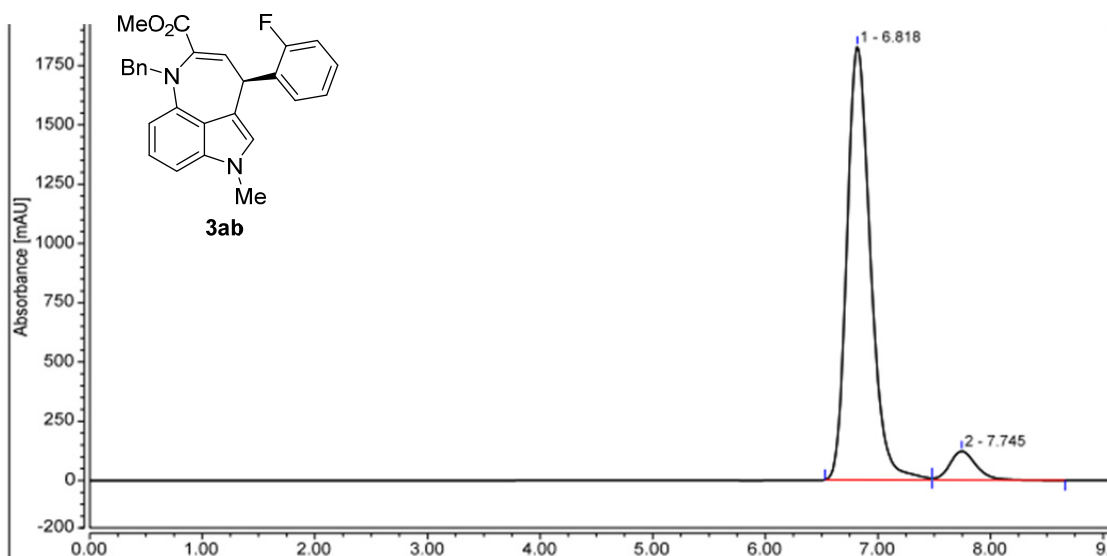

| Peak          | Retention Time min | Area mAU*min   | Height mAU      | Area %        | Height %      |
|---------------|--------------------|----------------|-----------------|---------------|---------------|
| 1             | 6.818              | 441.882        | 1827.350        | 92.99         | 93.75         |
| 2             | 7.745              | 33.304         | 121.723         | 7.01          | 6.25          |
| <b>Total:</b> |                    | <b>475.186</b> | <b>1949.074</b> | <b>100.00</b> | <b>100.00</b> |

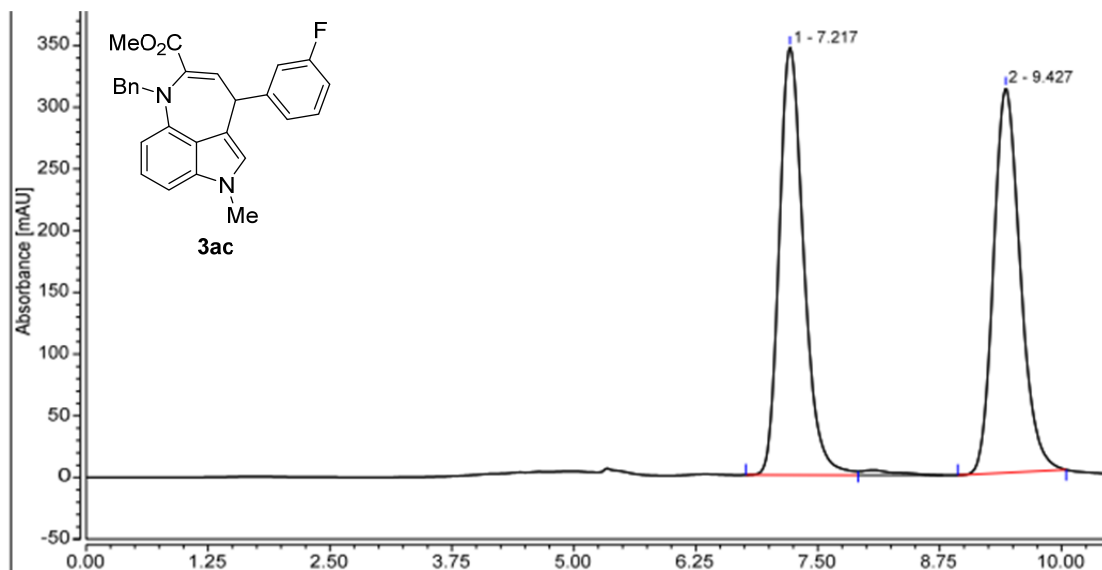

| Peak          | Retention Time<br>min | Area<br>mAU*min | Height<br>mAU  | Area<br>%     | Height<br>%   |
|---------------|-----------------------|-----------------|----------------|---------------|---------------|
| 1             | 7.217                 | 100.909         | 346.585        | 50.47         | 52.64         |
| 2             | 9.427                 | 99.032          | 311.802        | 49.53         | 47.36         |
| <b>Total:</b> |                       | <b>199.942</b>  | <b>658.387</b> | <b>100.00</b> | <b>100.00</b> |

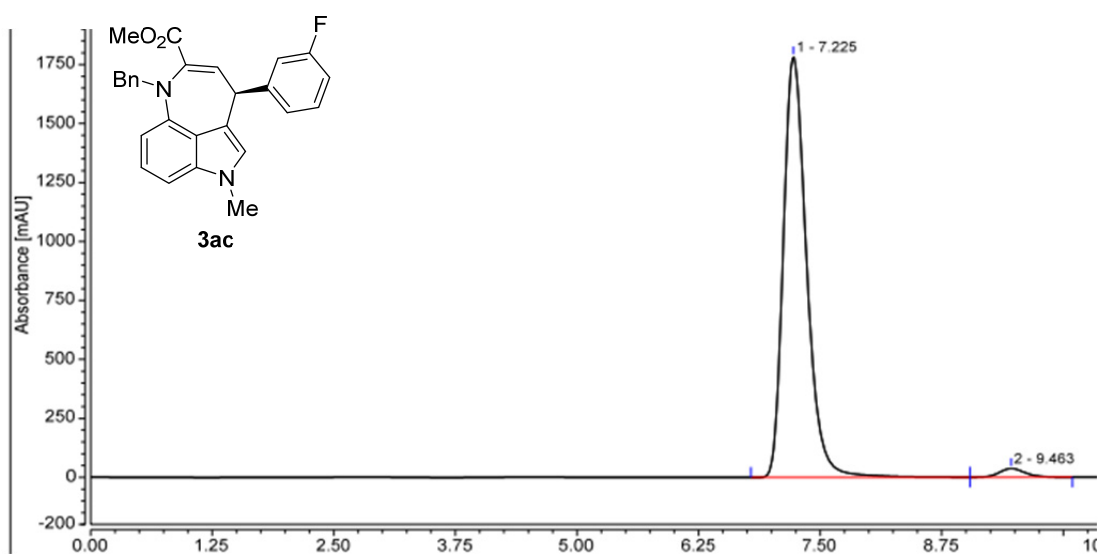

| Peak          | Retention Time<br>min | Area<br>mAU*min | Height<br>mAU   | Area<br>%     | Height<br>%   |
|---------------|-----------------------|-----------------|-----------------|---------------|---------------|
| 1             | 7.225                 | 495.170         | 1783.498        | 97.72         | 97.96         |
| 2             | 9.463                 | 11.537          | 37.133          | 2.28          | 2.04          |
| <b>Total:</b> |                       | <b>506.707</b>  | <b>1820.630</b> | <b>100.00</b> | <b>100.00</b> |

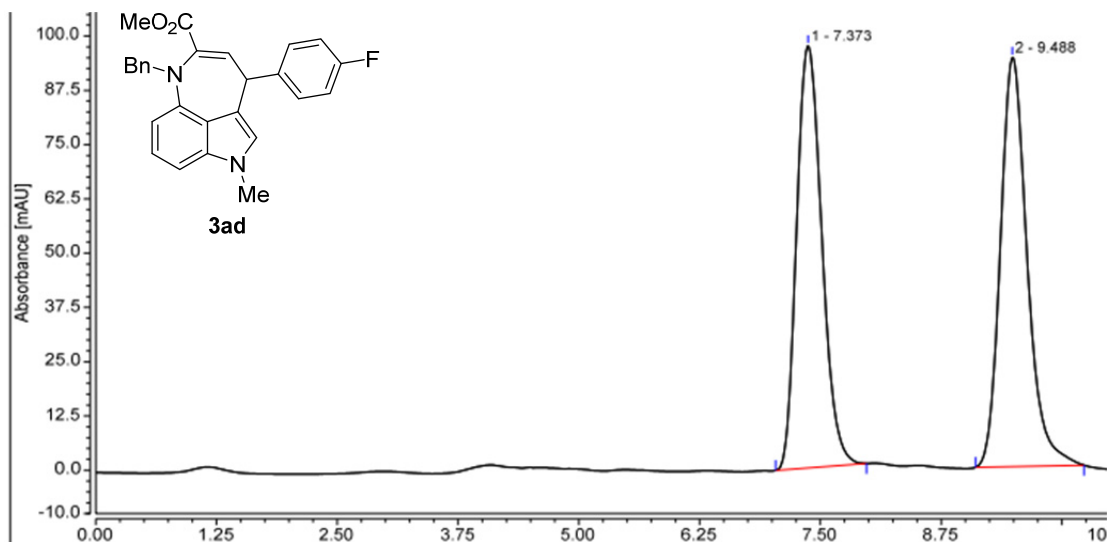

| Peak          | Retention Time<br>min | Area<br>mAU*min | Height<br>mAU  | Area<br>%     | Height<br>%   |
|---------------|-----------------------|-----------------|----------------|---------------|---------------|
| 1             | 7.373                 | 29.378          | 97.298         | 49.21         | 50.78         |
| 2             | 9.488                 | 30.323          | 94.312         | 50.79         | 49.22         |
| <b>Total:</b> |                       | <b>59.701</b>   | <b>191.611</b> | <b>100.00</b> | <b>100.00</b> |

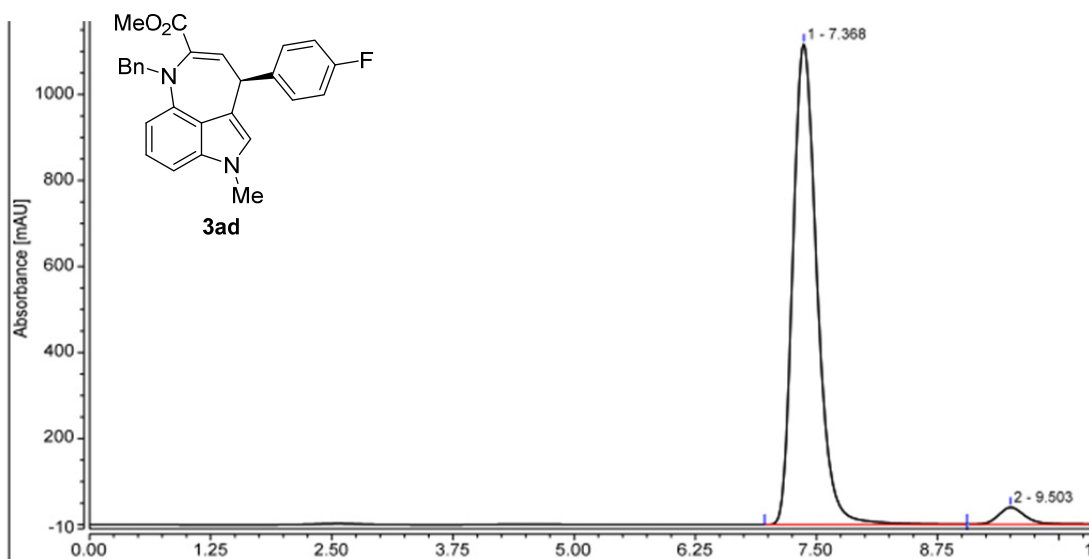

| Peak          | Retention Time<br>min | Area<br>mAU*min | Height<br>mAU   | Area<br>%     | Height<br>%   |
|---------------|-----------------------|-----------------|-----------------|---------------|---------------|
| 1             | 7.368                 | 321.314         | 1116.792        | 96.20         | 96.61         |
| 2             | 9.503                 | 12.676          | 39.232          | 3.80          | 3.39          |
| <b>Total:</b> |                       | <b>333.990</b>  | <b>1156.024</b> | <b>100.00</b> | <b>100.00</b> |

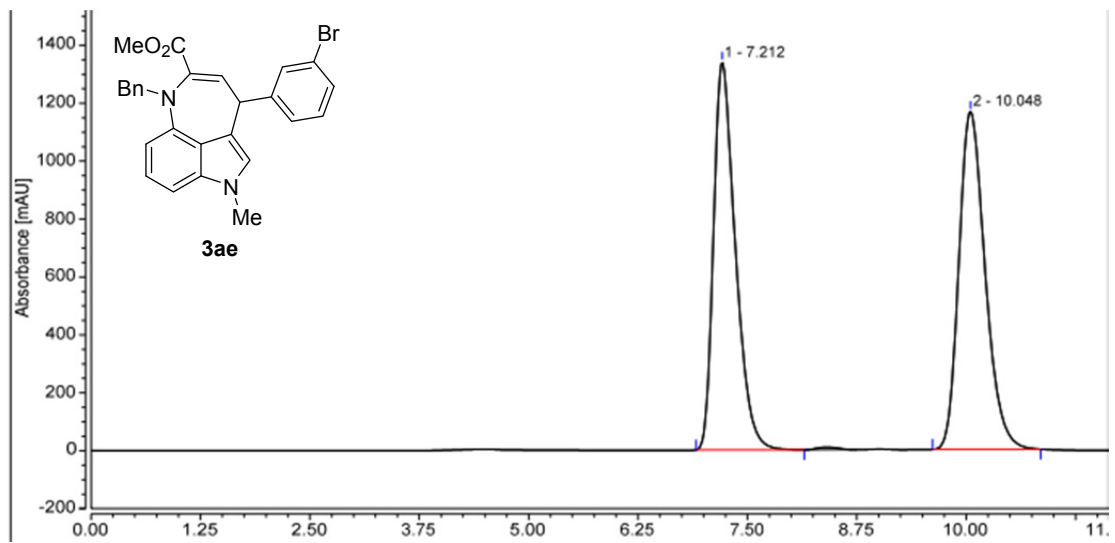

| Peak          | Retention Time min | Area mAU*min   | Height mAU      | Area %        | Height %      |
|---------------|--------------------|----------------|-----------------|---------------|---------------|
| 1             | 7.212              | 386.357        | 1338.614        | 48.78         | 53.42         |
| 2             | 10.048             | 405.649        | 1167.218        | 51.22         | 46.58         |
| <b>Total:</b> |                    | <b>792.006</b> | <b>2505.832</b> | <b>100.00</b> | <b>100.00</b> |

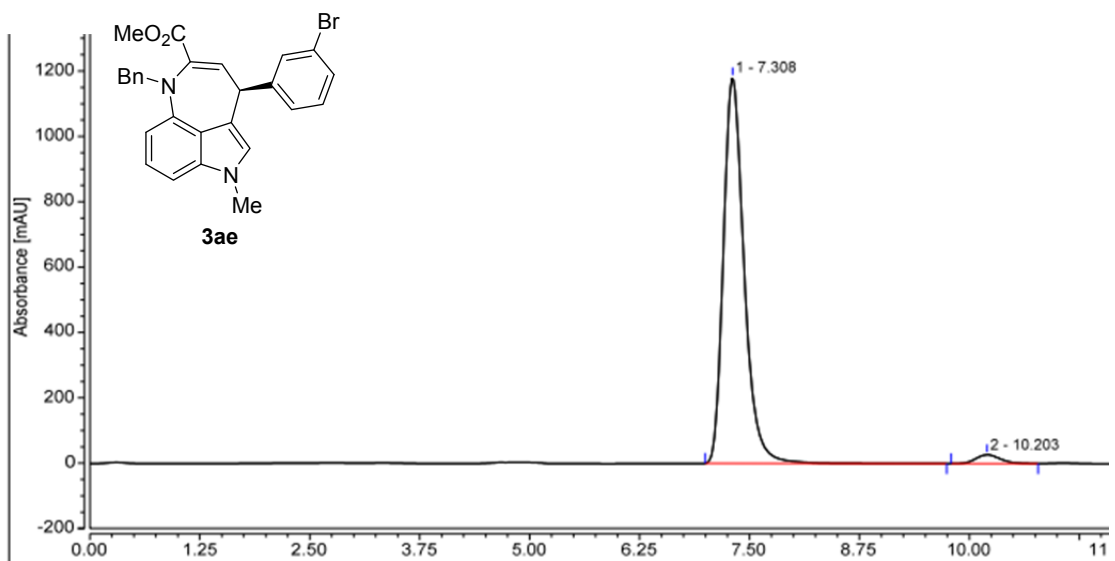

| Peak          | Retention Time min | Area mAU*min   | Height mAU      | Area %        | Height %      |
|---------------|--------------------|----------------|-----------------|---------------|---------------|
| 1             | 7.308              | 321.684        | 1179.702        | 97.37         | 97.76         |
| 2             | 10.203             | 8.703          | 26.982          | 2.63          | 2.24          |
| <b>Total:</b> |                    | <b>330.387</b> | <b>1206.684</b> | <b>100.00</b> | <b>100.00</b> |



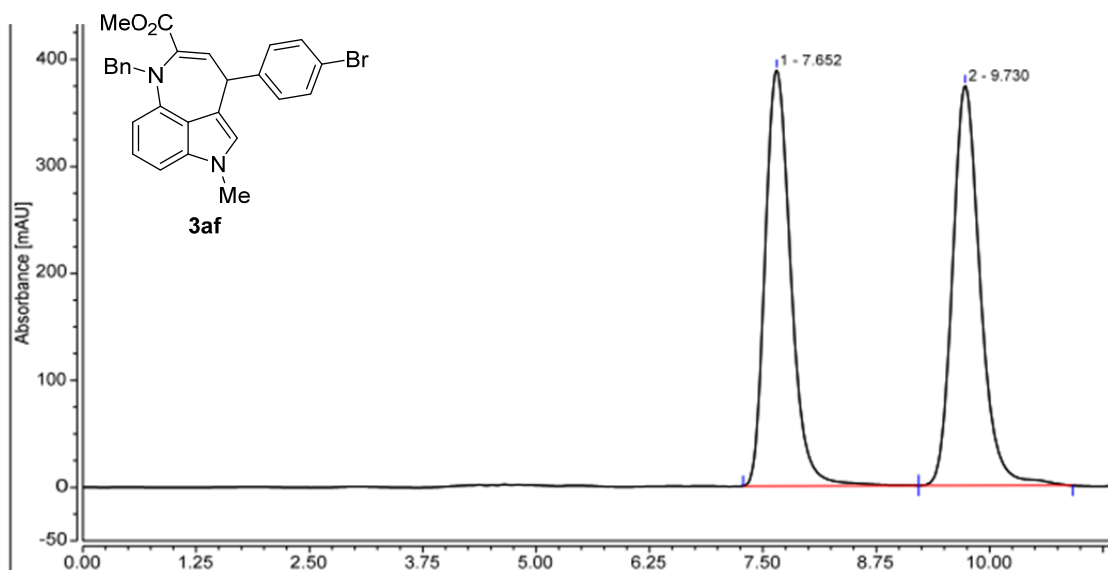

| Peak          | Retention Time min | Area mAU*min   | Height mAU     | Area %        | Height %      |
|---------------|--------------------|----------------|----------------|---------------|---------------|
| 1             | 7.652              | 127.520        | 388.716        | 49.05         | 50.97         |
| 2             | 9.730              | 132.437        | 373.989        | 50.95         | 49.03         |
| <b>Total:</b> |                    | <b>259.956</b> | <b>762.705</b> | <b>100.00</b> | <b>100.00</b> |

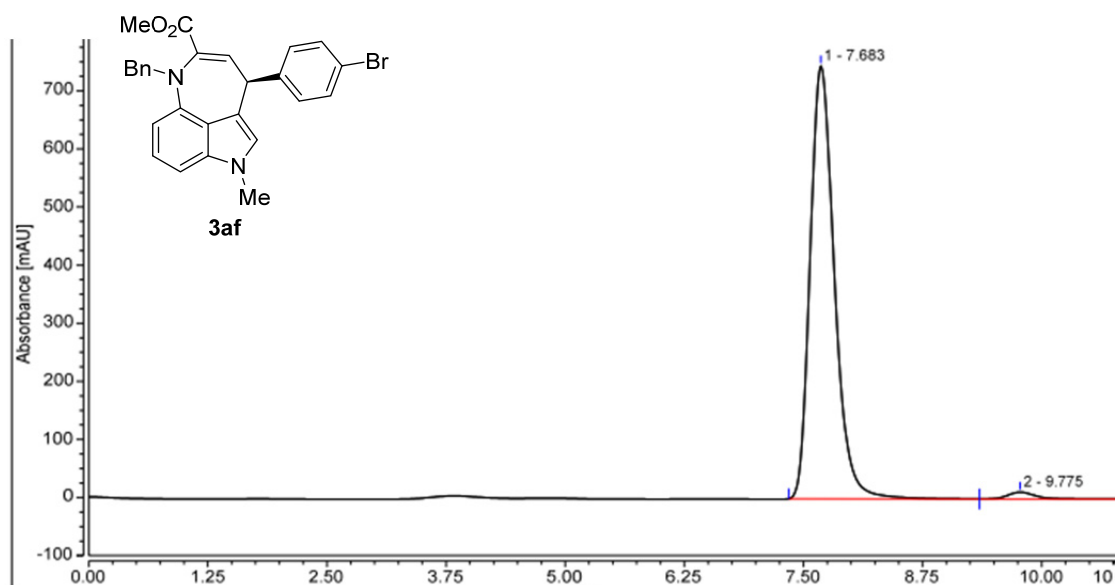

| Peak          | Retention Time min | Area mAU*min   | Height mAU     | Area %        | Height %      |
|---------------|--------------------|----------------|----------------|---------------|---------------|
| 1             | 7.683              | 219.719        | 745.189        | 98.23         | 98.45         |
| 2             | 9.775              | 3.964          | 11.729         | 1.77          | 1.55          |
| <b>Total:</b> |                    | <b>223.683</b> | <b>756.918</b> | <b>100.00</b> | <b>100.00</b> |

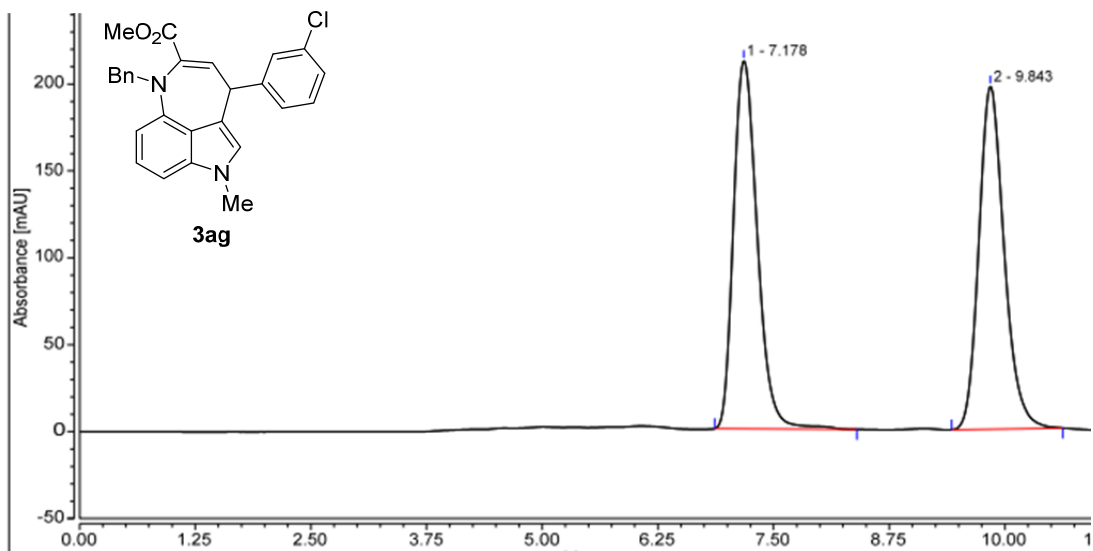

| Peak          | Retention Time min | Area mAU*min   | Height mAU     | Area %        | Height %      |
|---------------|--------------------|----------------|----------------|---------------|---------------|
| 1             | 7.178              | 63.339         | 211.921        | 50.18         | 51.77         |
| 2             | 9.843              | 62.895         | 197.455        | 49.82         | 48.23         |
| <b>Total:</b> |                    | <b>126.233</b> | <b>409.376</b> | <b>100.00</b> | <b>100.00</b> |

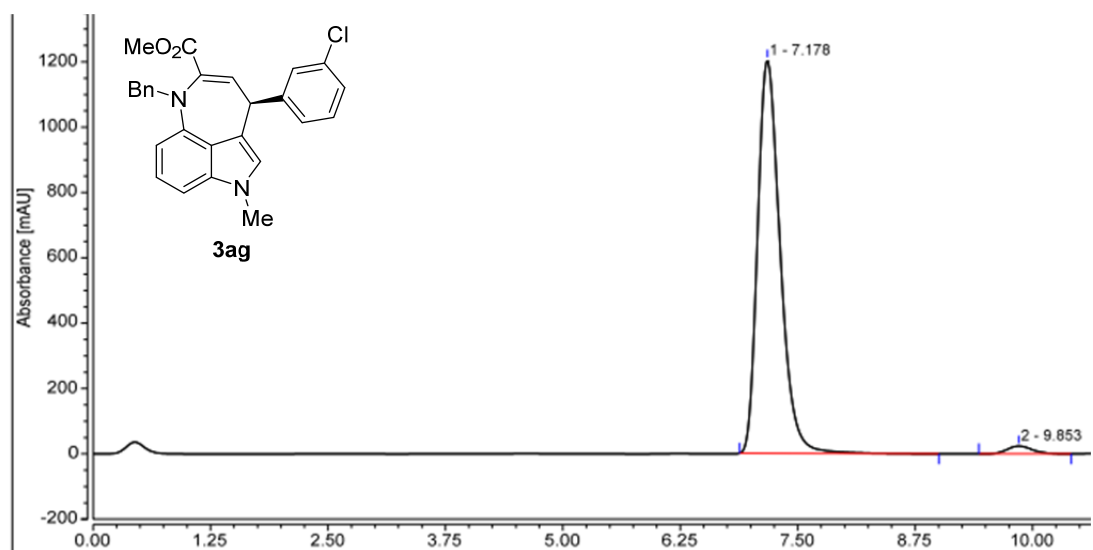

| Peak          | Retention Time min | Area mAU*min   | Height mAU      | Area %        | Height %      |
|---------------|--------------------|----------------|-----------------|---------------|---------------|
| 1             | 7.178              | 334.462        | 1203.869        | 97.82         | 98.06         |
| 2             | 9.853              | 7.466          | 23.838          | 2.18          | 1.94          |
| <b>Total:</b> |                    | <b>341.928</b> | <b>1227.708</b> | <b>100.00</b> | <b>100.00</b> |

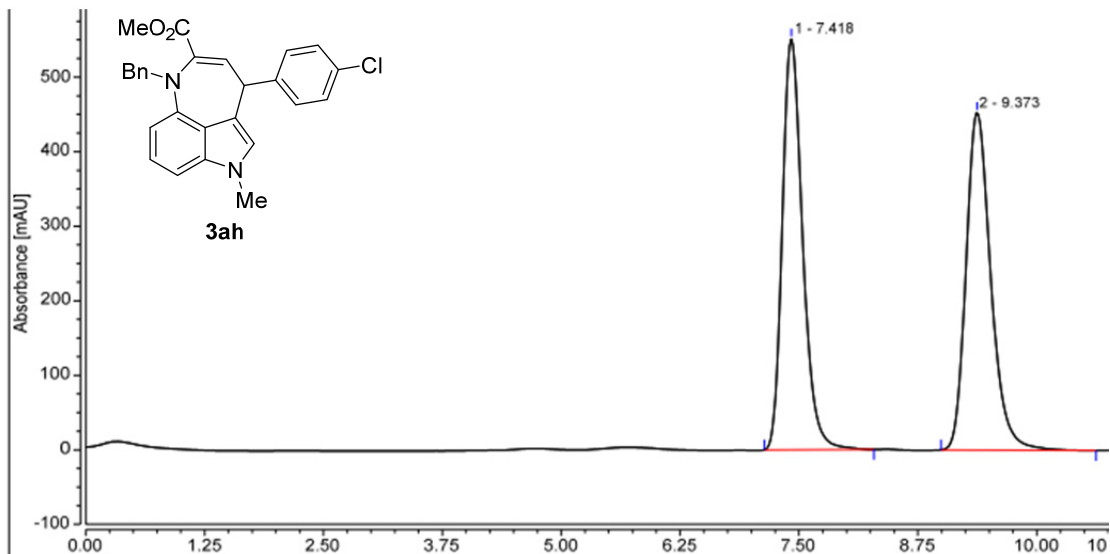

| Peak          | Retention Time min | Area mAU*min   | Height mAU      | Area %        | Height %      |
|---------------|--------------------|----------------|-----------------|---------------|---------------|
| 1             | 7.418              | 136.480        | 551.242         | 49.94         | 54.89         |
| 2             | 9.373              | 136.823        | 452.989         | 50.06         | 45.11         |
| <b>Total:</b> |                    | <b>273.303</b> | <b>1004.231</b> | <b>100.00</b> | <b>100.00</b> |

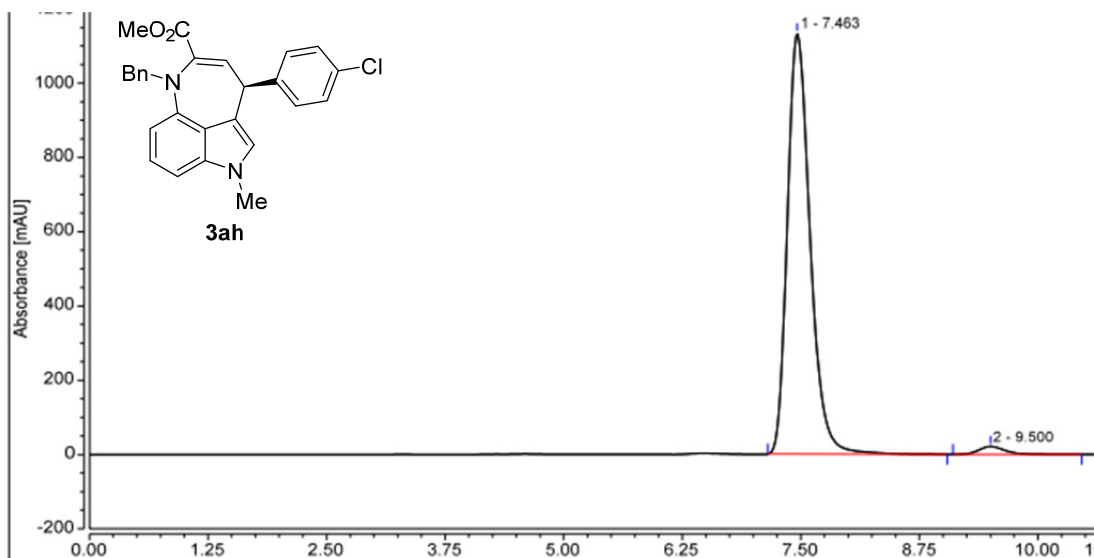

| Peak          | Retention Time min | Area mAU*min   | Height mAU      | Area %        | Height %      |
|---------------|--------------------|----------------|-----------------|---------------|---------------|
| 1             | 7.463              | 314.888        | 1132.369        | 97.92         | 98.16         |
| 2             | 9.500              | 6.698          | 21.244          | 2.08          | 1.84          |
| <b>Total:</b> |                    | <b>321.585</b> | <b>1153.613</b> | <b>100.00</b> | <b>100.00</b> |

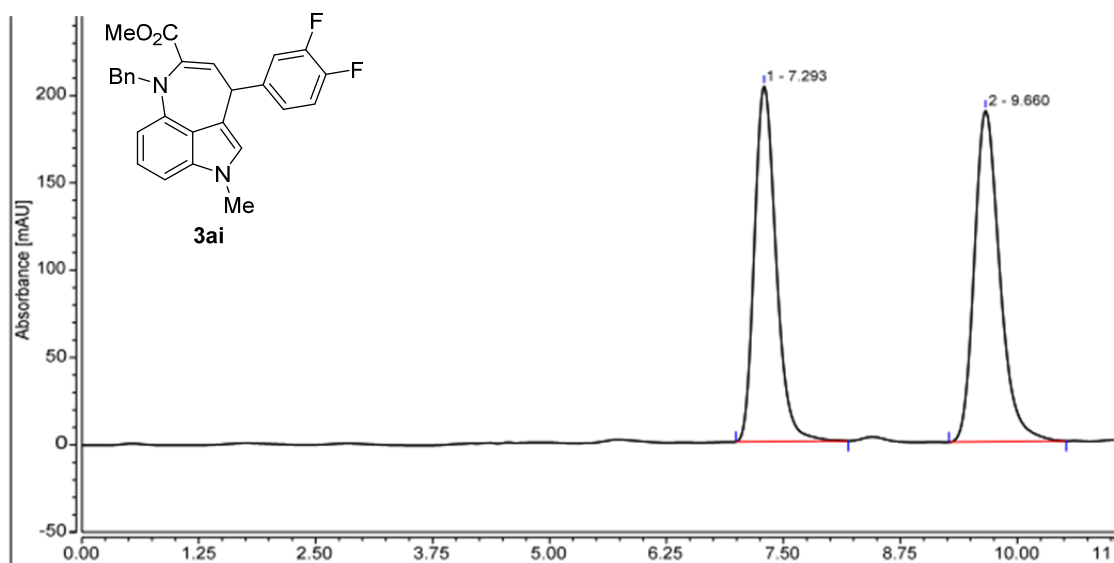

| Peak          | Retention Time<br>min | Area<br>mAU*min | Height<br>mAU  | Area<br>%     | Height<br>%   |
|---------------|-----------------------|-----------------|----------------|---------------|---------------|
| 1             | 7.293                 | 54.389          | 203.725        | 47.60         | 51.77         |
| 2             | 9.660                 | 59.865          | 189.772        | 52.40         | 48.23         |
| <b>Total:</b> |                       | <b>114.254</b>  | <b>393.497</b> | <b>100.00</b> | <b>100.00</b> |

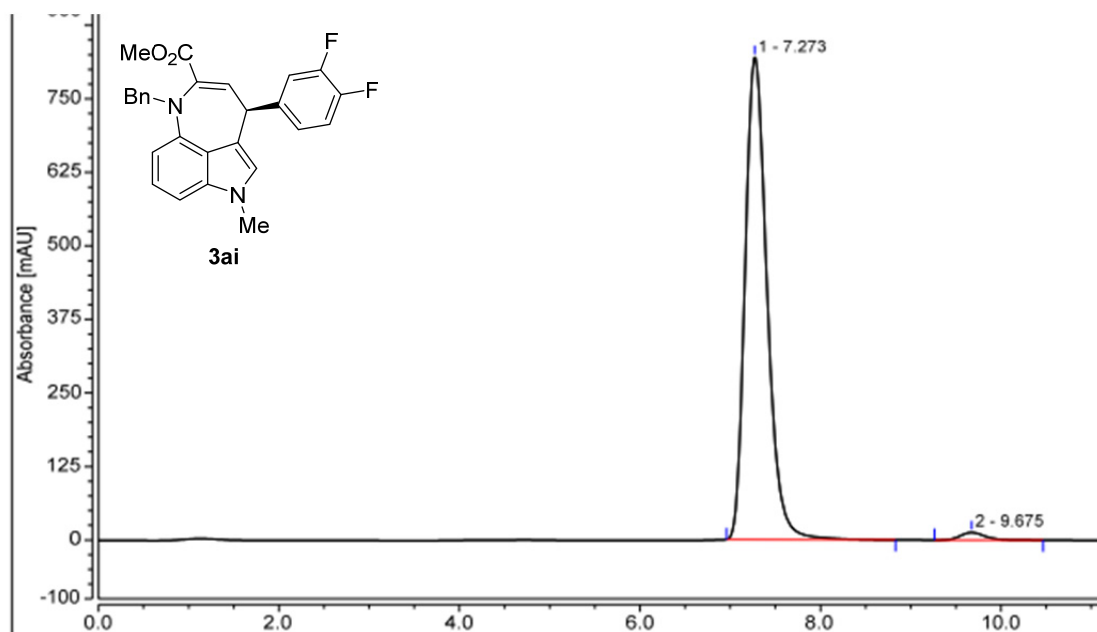

| Peak          | Retention Time<br>min | Area<br>mAU*min | Height<br>mAU  | Area<br>%     | Height<br>%   |
|---------------|-----------------------|-----------------|----------------|---------------|---------------|
| 1             | 7.273                 | 231.156         | 819.822        | 98.19         | 98.46         |
| 2             | 9.675                 | 4.258           | 12.832         | 1.81          | 1.54          |
| <b>Total:</b> |                       | <b>235.414</b>  | <b>832.654</b> | <b>100.00</b> | <b>100.00</b> |

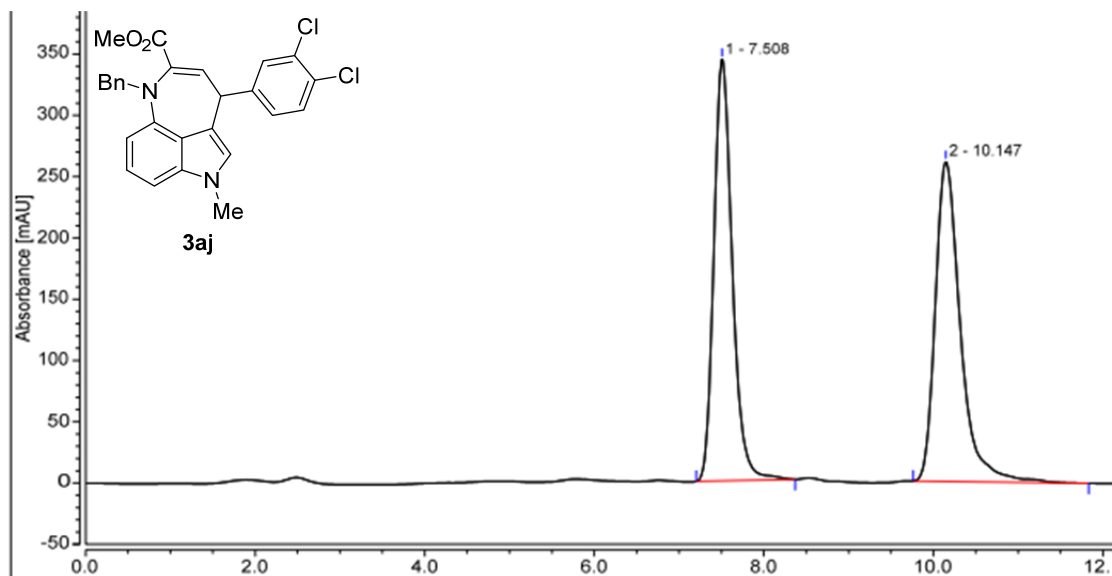

| Peak          | Retention Time [min] | Area [mAU*min] | Height [mAU]   | Area %        | Height %      |
|---------------|----------------------|----------------|----------------|---------------|---------------|
| 1             | 7.508                | 86.664         | 344.044        | 49.16         | 56.85         |
| 2             | 10.147               | 89.610         | 261.085        | 50.84         | 43.15         |
| <b>Total:</b> |                      | <b>176.274</b> | <b>605.130</b> | <b>100.00</b> | <b>100.00</b> |

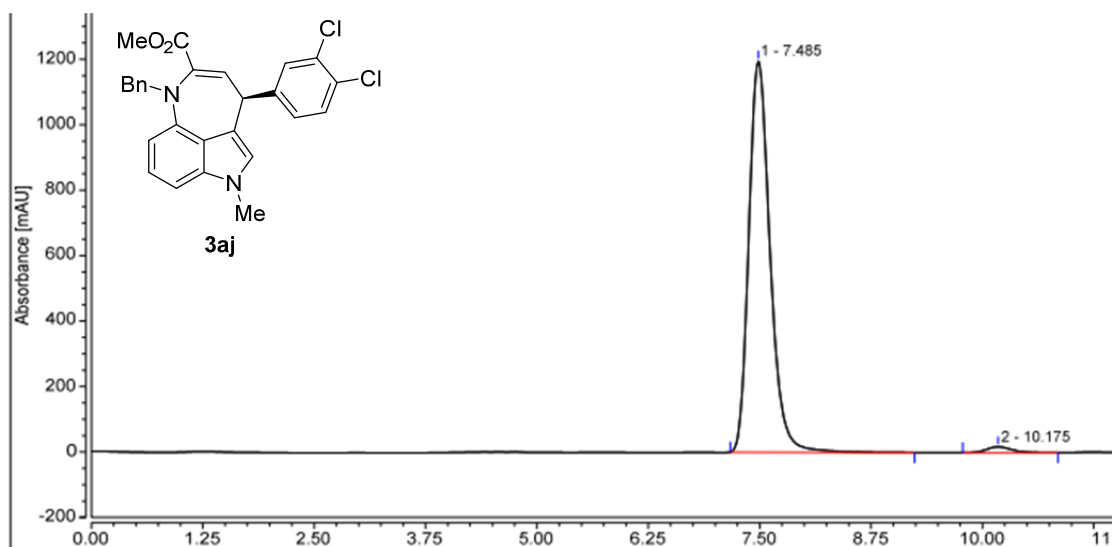

| Peak          | Retention Time [min] | Area [mAU*min] | Height [mAU]    | Area %        | Height %      |
|---------------|----------------------|----------------|-----------------|---------------|---------------|
| 1             | 7.485                | 330.492        | 1194.822        | 98.25         | 98.53         |
| 2             | 10.175               | 5.899          | 17.841          | 1.75          | 1.47          |
| <b>Total:</b> |                      | <b>336.391</b> | <b>1212.662</b> | <b>100.00</b> | <b>100.00</b> |

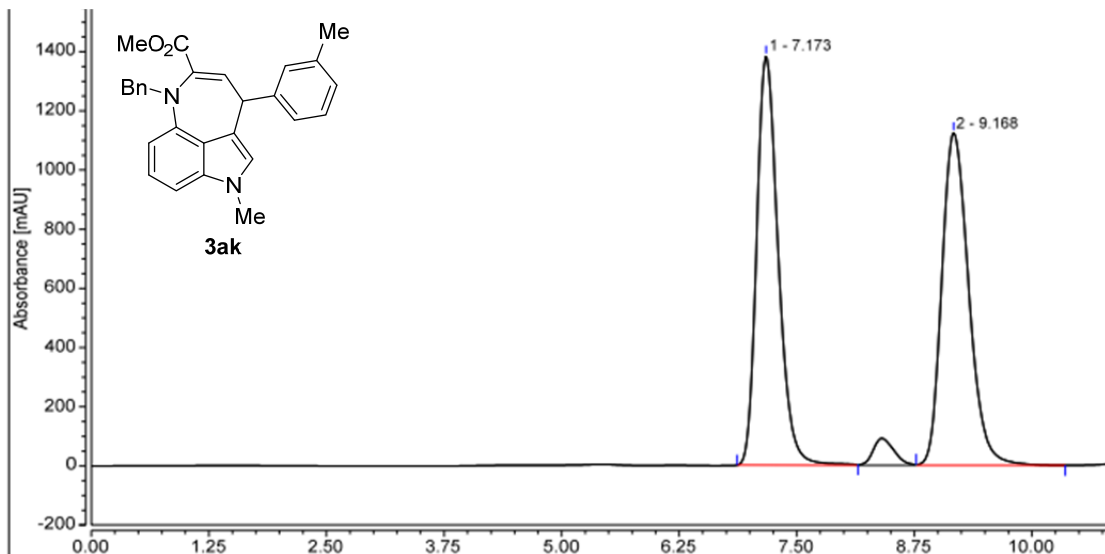

| Peak          | Retention Time (min) | Area (mAU*min) | Height (mAU)    | Area (%)      | Height (%)    |
|---------------|----------------------|----------------|-----------------|---------------|---------------|
| 1             | 7.173                | 367.258        | 1382.716        | 49.62         | 55.17         |
| 2             | 9.168                | 372.894        | 1123.374        | 50.38         | 44.83         |
| <b>Total:</b> |                      | <b>740.152</b> | <b>2506.090</b> | <b>100.00</b> | <b>100.00</b> |

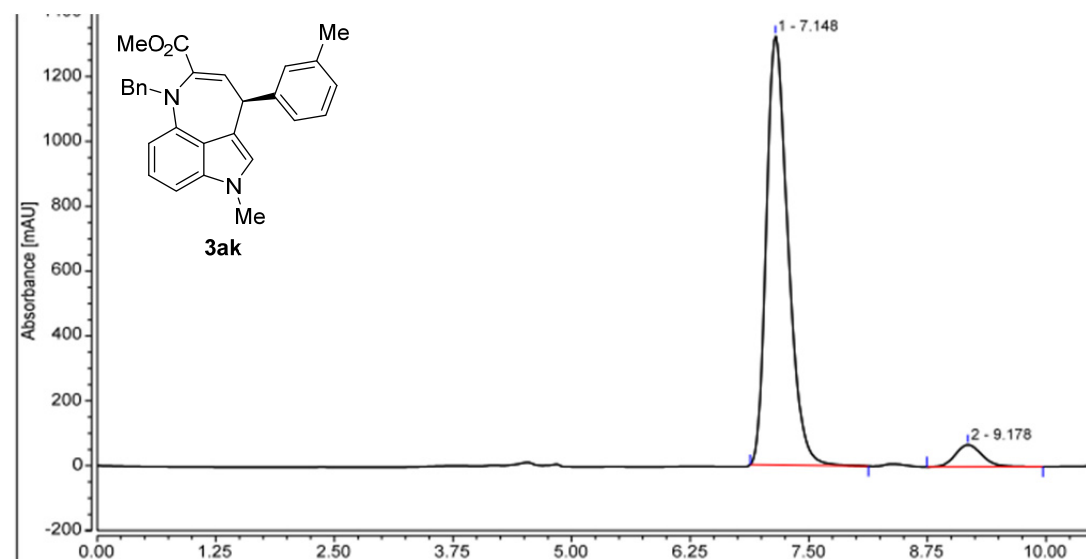

| Peak          | Retention Time (min) | Area (mAU*min) | Height (mAU)    | Area (%)      | Height (%)    |
|---------------|----------------------|----------------|-----------------|---------------|---------------|
| 1             | 7.148                | 348.808        | 1322.561        | 94.05         | 95.14         |
| 2             | 9.178                | 22.065         | 67.513          | 5.95          | 4.86          |
| <b>Total:</b> |                      | <b>370.873</b> | <b>1390.074</b> | <b>100.00</b> | <b>100.00</b> |

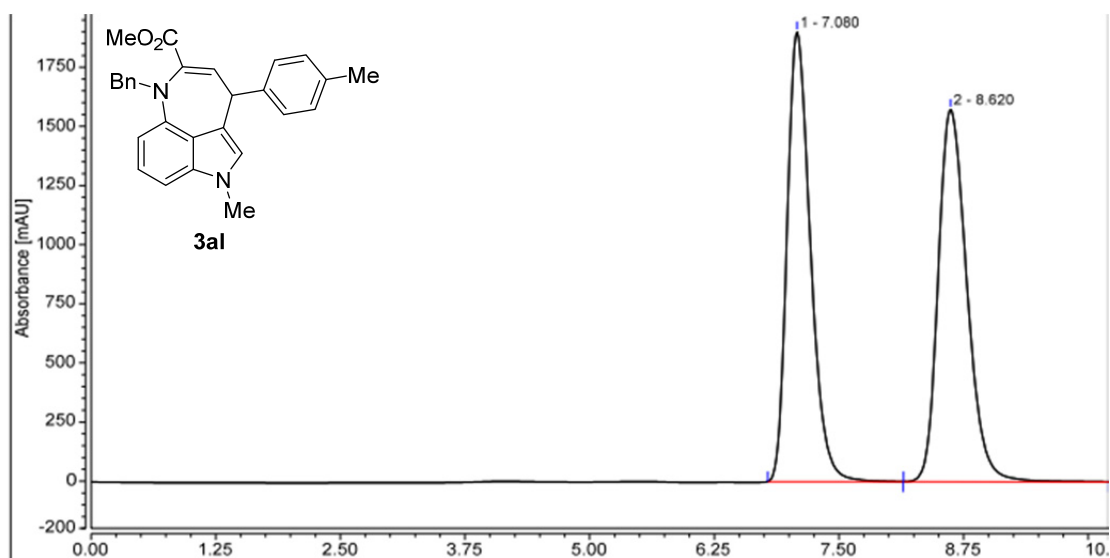

| Peak          | Retention Time min | Area mAU*min    | Height mAU      | Area %        | Height %      |
|---------------|--------------------|-----------------|-----------------|---------------|---------------|
| 1             | 7.080              | 516.373         | 1900.918        | 49.53         | 54.69         |
| 2             | 8.620              | 526.246         | 1574.929        | 50.47         | 45.31         |
| <b>Total:</b> |                    | <b>1042.619</b> | <b>3475.847</b> | <b>100.00</b> | <b>100.00</b> |

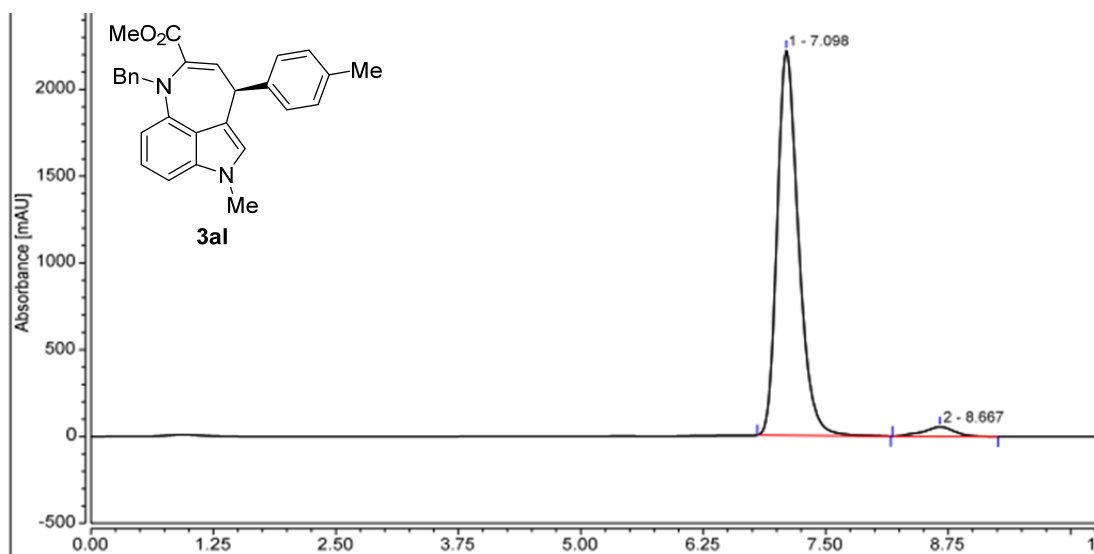

| Peak          | Retention Time min | Area mAU*min   | Height mAU      | Area %        | Height %      |
|---------------|--------------------|----------------|-----------------|---------------|---------------|
| 1             | 7.098              | 559.120        | 2216.898        | 96.52         | 97.60         |
| 2             | 8.667              | 20.153         | 54.542          | 3.48          | 2.40          |
| <b>Total:</b> |                    | <b>579.273</b> | <b>2271.440</b> | <b>100.00</b> | <b>100.00</b> |

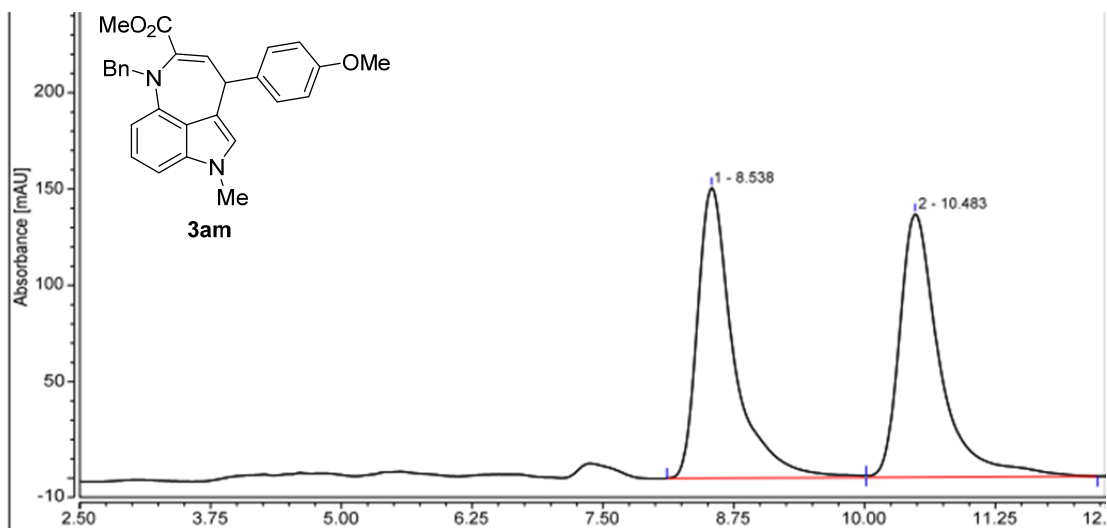

| Peak          | Retention Time min | Area mAU*min   | Height mAU     | Area %        | Height %      |
|---------------|--------------------|----------------|----------------|---------------|---------------|
| 1             | 8.538              | 60.570         | 150.723        | 49.96         | 52.45         |
| 2             | 10.483             | 60.663         | 136.650        | 50.04         | 47.55         |
| <b>Total:</b> |                    | <b>121.233</b> | <b>287.373</b> | <b>100.00</b> | <b>100.00</b> |

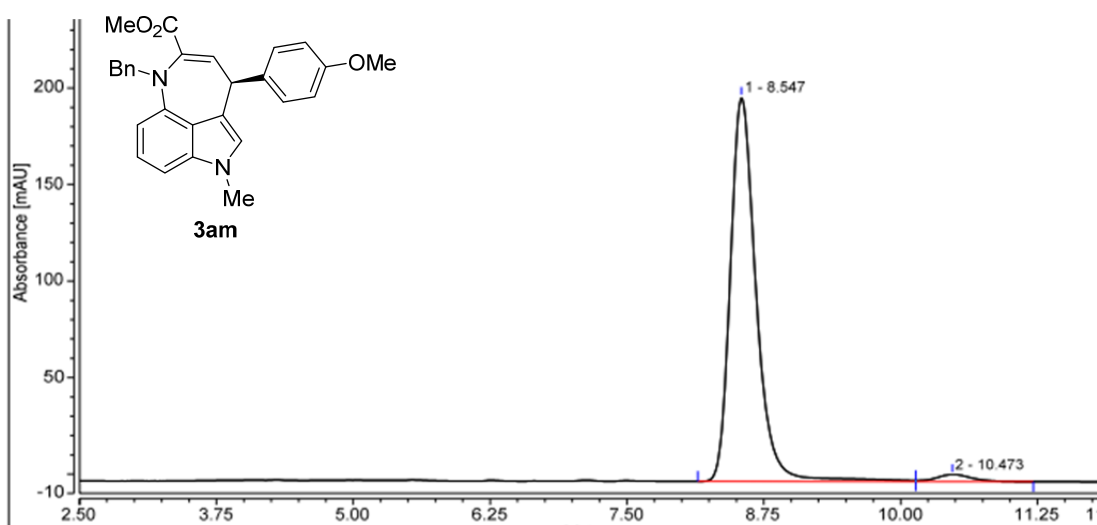

| Peak          | Retention Time min | Area mAU*min  | Height mAU     | Area %        | Height %      |
|---------------|--------------------|---------------|----------------|---------------|---------------|
| 1             | 8.547              | 54.476        | 198.999        | 97.55         | 98.19         |
| 2             | 10.473             | 1.371         | 3.663          | 2.45          | 1.81          |
| <b>Total:</b> |                    | <b>55.847</b> | <b>202.661</b> | <b>100.00</b> | <b>100.00</b> |



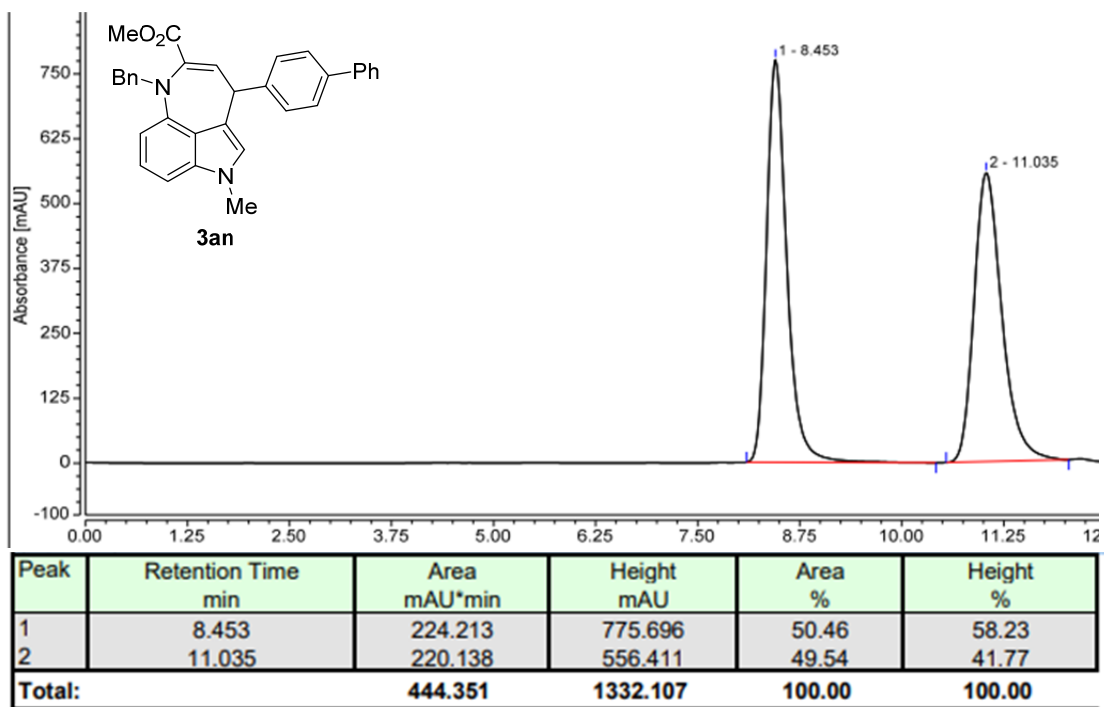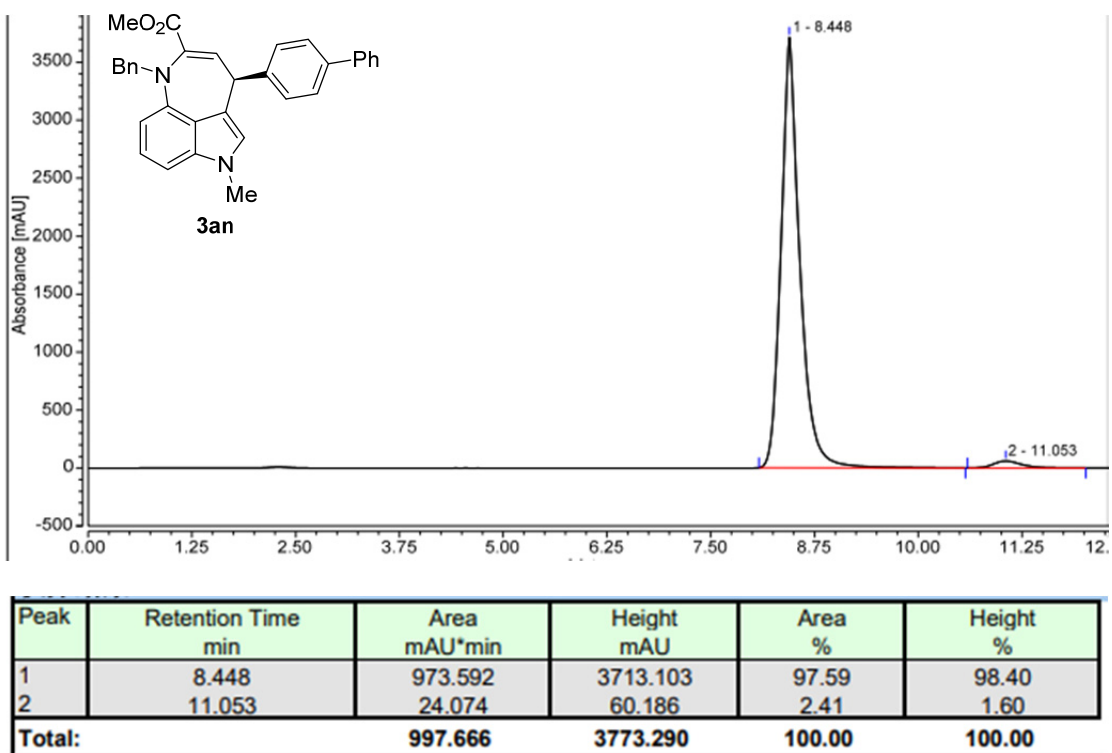

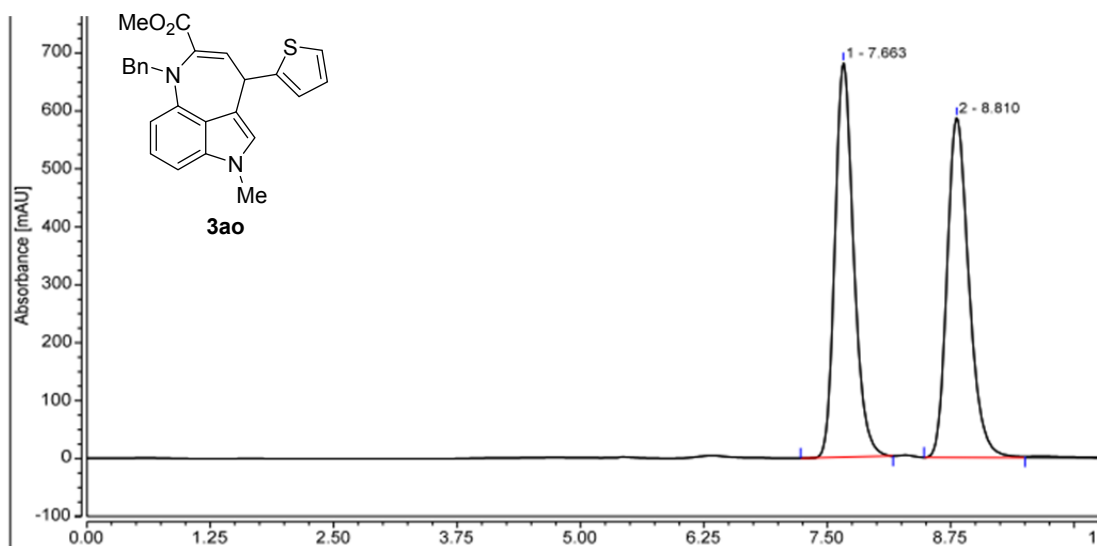

| Peak          | Retention Time min | Area mAU*min   | Height mAU      | Area %        | Height %      |
|---------------|--------------------|----------------|-----------------|---------------|---------------|
| 1             | 7.663              | 149.468        | 680.644         | 49.82         | 53.70         |
| 2             | 8.810              | 150.529        | 586.769         | 50.18         | 46.30         |
| <b>Total:</b> |                    | <b>299.996</b> | <b>1267.413</b> | <b>100.00</b> | <b>100.00</b> |

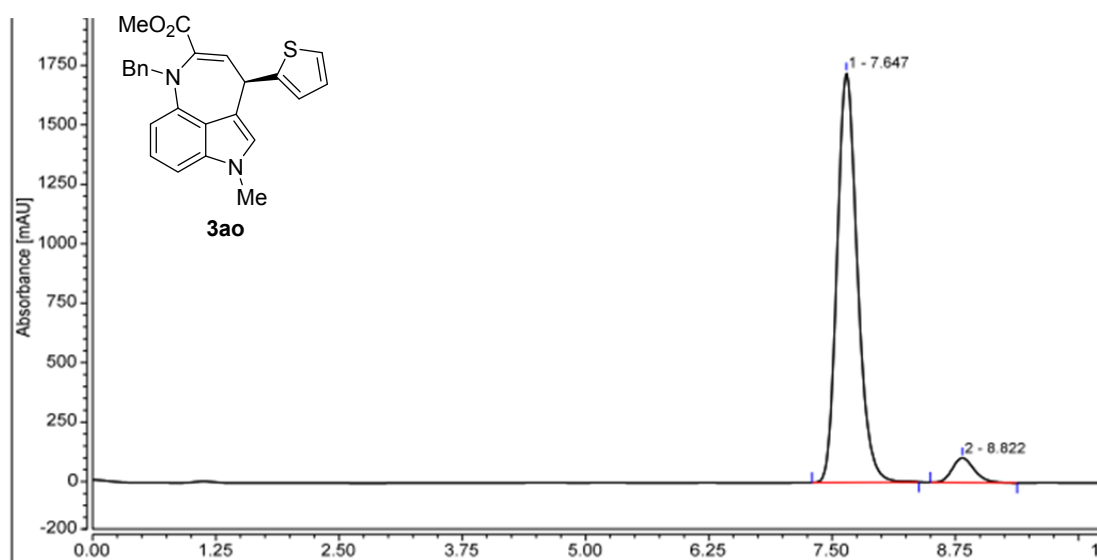

| Peak          | Retention Time min | Area mAU*min   | Height mAU      | Area %        | Height %      |
|---------------|--------------------|----------------|-----------------|---------------|---------------|
| 1             | 7.647              | 411.121        | 1722.365        | 93.86         | 94.33         |
| 2             | 8.822              | 26.896         | 103.536         | 6.14          | 5.67          |
| <b>Total:</b> |                    | <b>438.017</b> | <b>1825.901</b> | <b>100.00</b> | <b>100.00</b> |

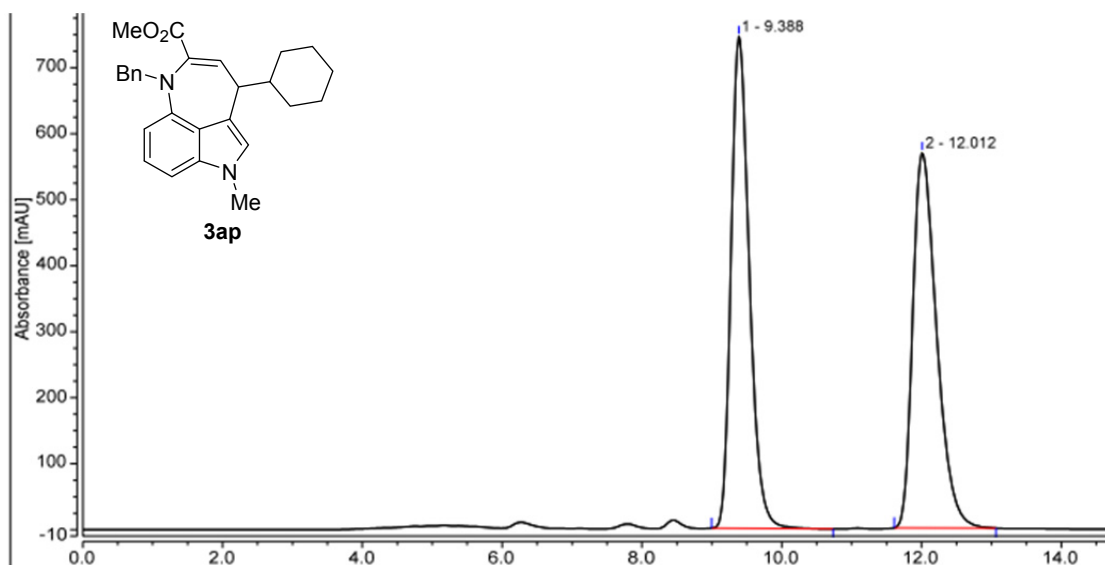

| Peak          | Retention Time<br>min | Area<br>mAU*min | Height<br>mAU   | Area<br>%     | Height<br>%   |
|---------------|-----------------------|-----------------|-----------------|---------------|---------------|
| 1             | 9.388                 | 226.098         | 745.374         | 50.12         | 56.72         |
| 2             | 12.012                | 224.979         | 568.734         | 49.88         | 43.28         |
| <b>Total:</b> |                       | <b>451.077</b>  | <b>1314.108</b> | <b>100.00</b> | <b>100.00</b> |

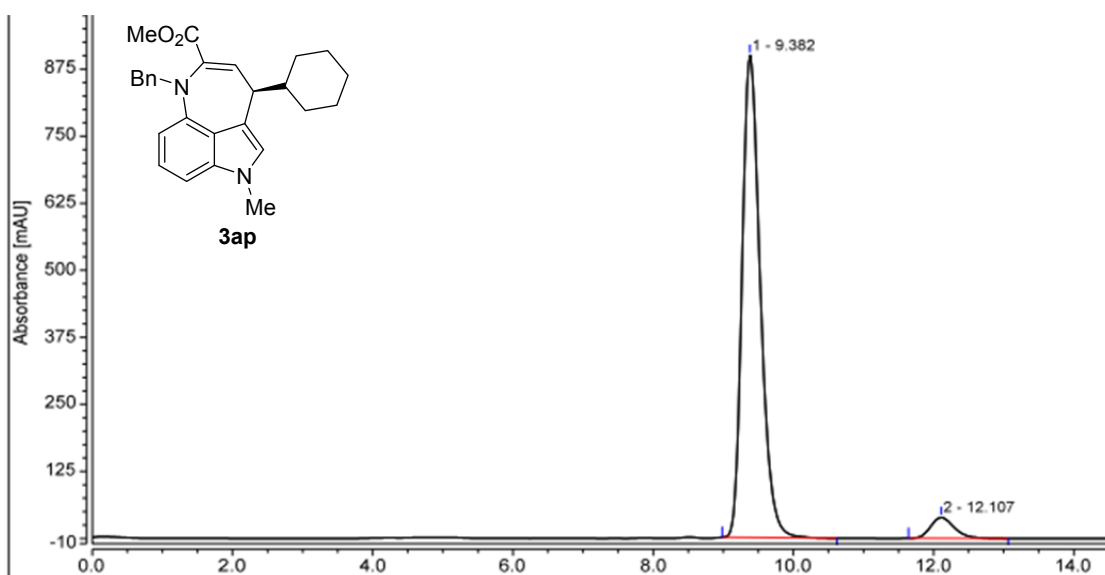

| Peak          | Retention Time<br>min | Area<br>mAU*min | Height<br>mAU  | Area<br>%     | Height<br>%   |
|---------------|-----------------------|-----------------|----------------|---------------|---------------|
| 1             | 9.382                 | 270.259         | 899.070        | 94.62         | 95.85         |
| 2             | 12.107                | 15.362          | 38.895         | 5.38          | 4.15          |
| <b>Total:</b> |                       | <b>285.622</b>  | <b>937.965</b> | <b>100.00</b> | <b>100.00</b> |

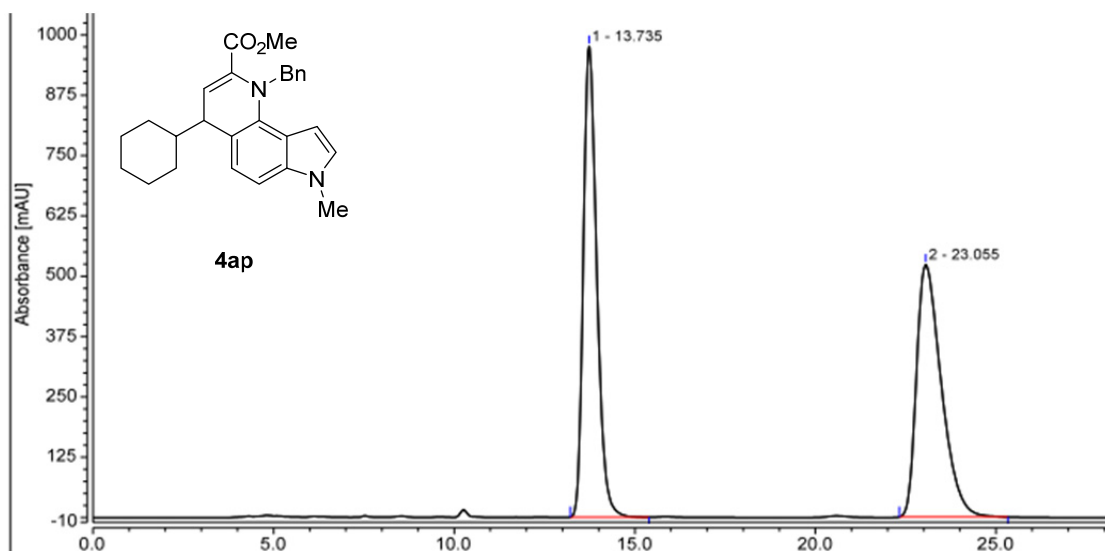

| Peak          | Retention Time<br>min | Area<br>mAU*min | Height<br>mAU   | Area<br>%     | Height<br>%   |
|---------------|-----------------------|-----------------|-----------------|---------------|---------------|
| 1             | 13.735                | 420.835         | 976.064         | 50.21         | 65.10         |
| 2             | 23.055                | 417.379         | 523.257         | 49.79         | 34.90         |
| <b>Total:</b> |                       | <b>838.214</b>  | <b>1499.321</b> | <b>100.00</b> | <b>100.00</b> |

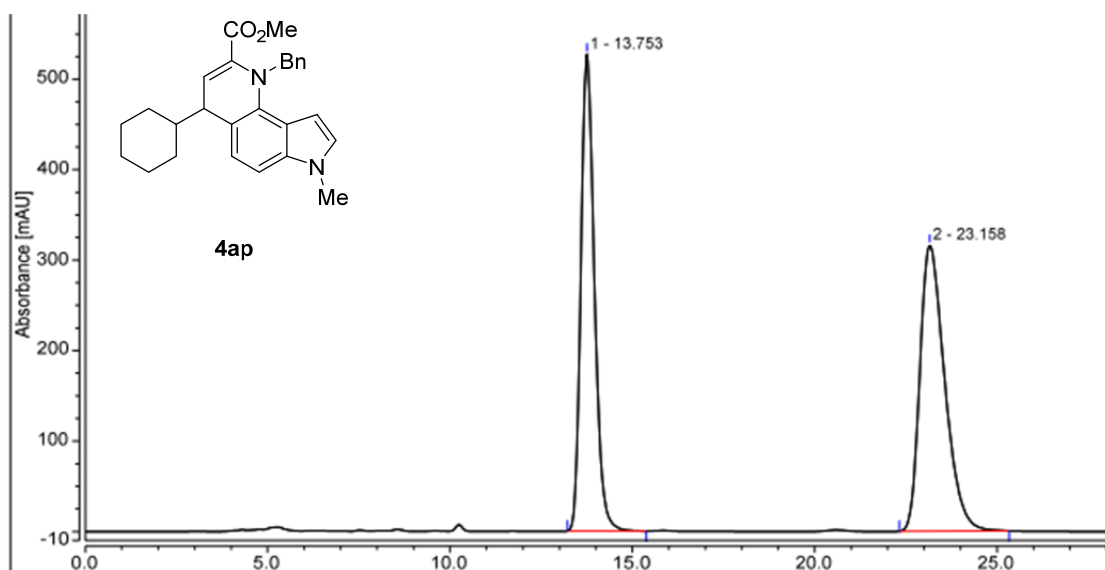

| Peak          | Retention Time<br>min | Area<br>mAU*min | Height<br>mAU  | Area<br>%     | Height<br>%   |
|---------------|-----------------------|-----------------|----------------|---------------|---------------|
| 1             | 13.753                | 226.678         | 527.324        | 47.62         | 62.52         |
| 2             | 23.158                | 249.386         | 316.123        | 52.38         | 37.48         |
| <b>Total:</b> |                       | <b>476.065</b>  | <b>843.448</b> | <b>100.00</b> | <b>100.00</b> |

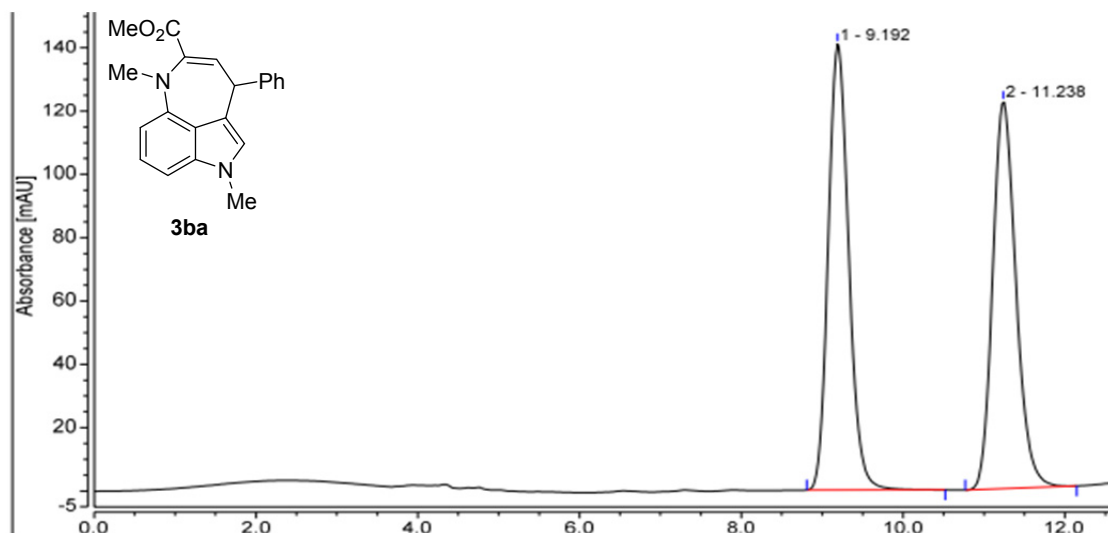

| Peak          | Retention Time min | Area mAU*min  | Height mAU     | Area %        | Height %      |
|---------------|--------------------|---------------|----------------|---------------|---------------|
| 1             | 9.192              | 41.342        | 140.936        | 50.38         | 53.53         |
| 2             | 11.238             | 40.718        | 122.333        | 49.62         | 46.47         |
| <b>Total:</b> |                    | <b>82.060</b> | <b>263.269</b> | <b>100.00</b> | <b>100.00</b> |

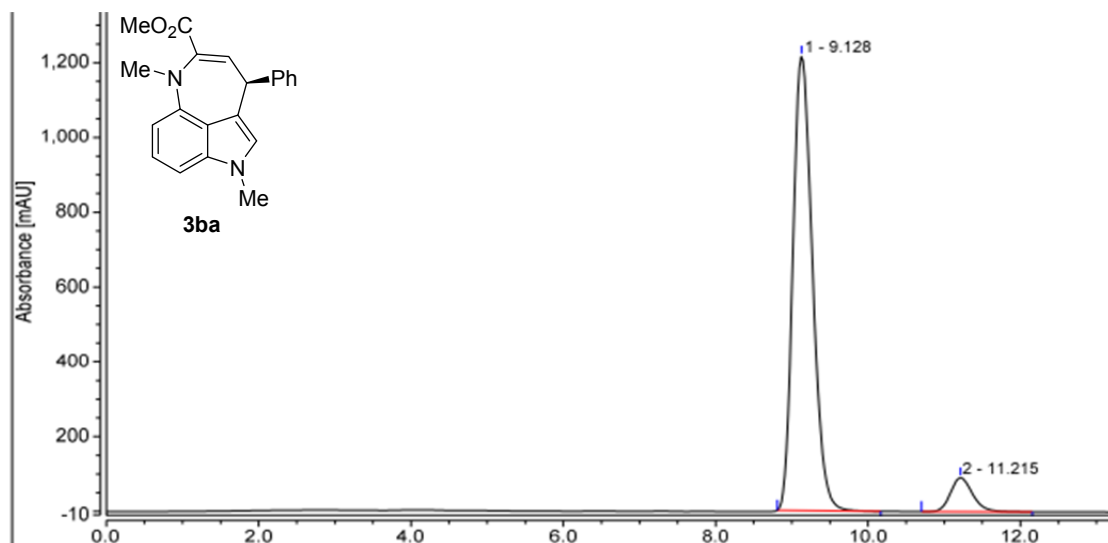

| Peak          | Retention Time min | Area mAU*min   | Height mAU      | Area %        | Height %      |
|---------------|--------------------|----------------|-----------------|---------------|---------------|
| 1             | 9.128              | 359.548        | 1214.701        | 92.19         | 93.07         |
| 2             | 11.215             | 30.471         | 90.427          | 7.81          | 6.93          |
| <b>Total:</b> |                    | <b>390.020</b> | <b>1305.128</b> | <b>100.00</b> | <b>100.00</b> |

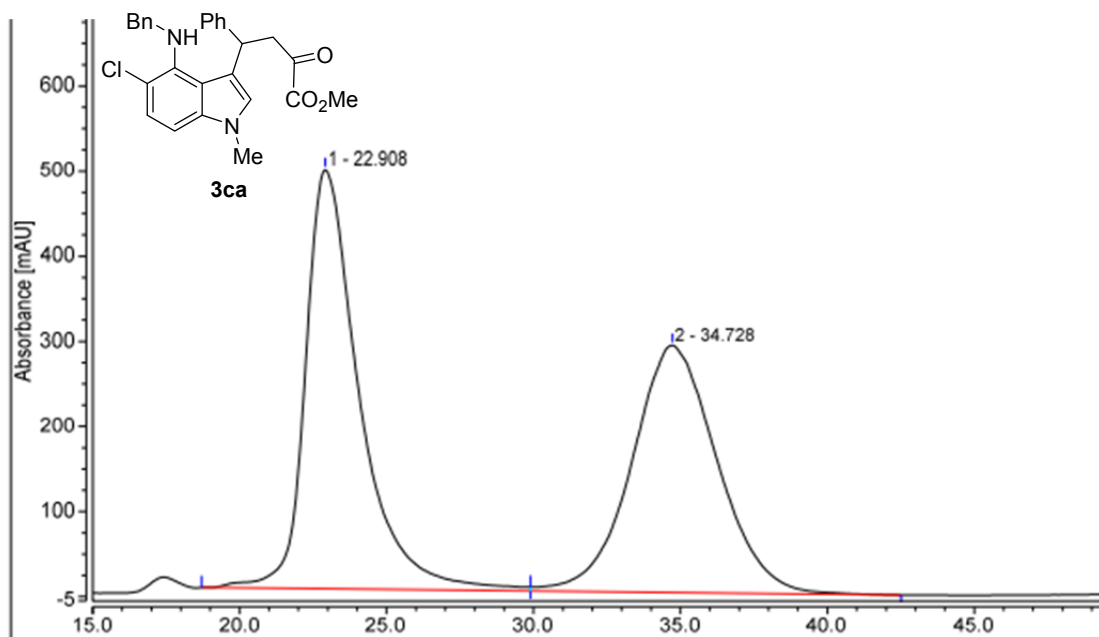

| Peak          | Retention Time<br>min | Area<br>mAU*min | Height<br>mAU  | Area<br>%     | Height<br>%   |
|---------------|-----------------------|-----------------|----------------|---------------|---------------|
| 1             | 22.908                | 1046.828        | 492.488        | 51.73         | 62.91         |
| 2             | 34.728                | 976.886         | 290.358        | 48.27         | 37.09         |
| <b>Total:</b> |                       | <b>2023.714</b> | <b>782.847</b> | <b>100.00</b> | <b>100.00</b> |

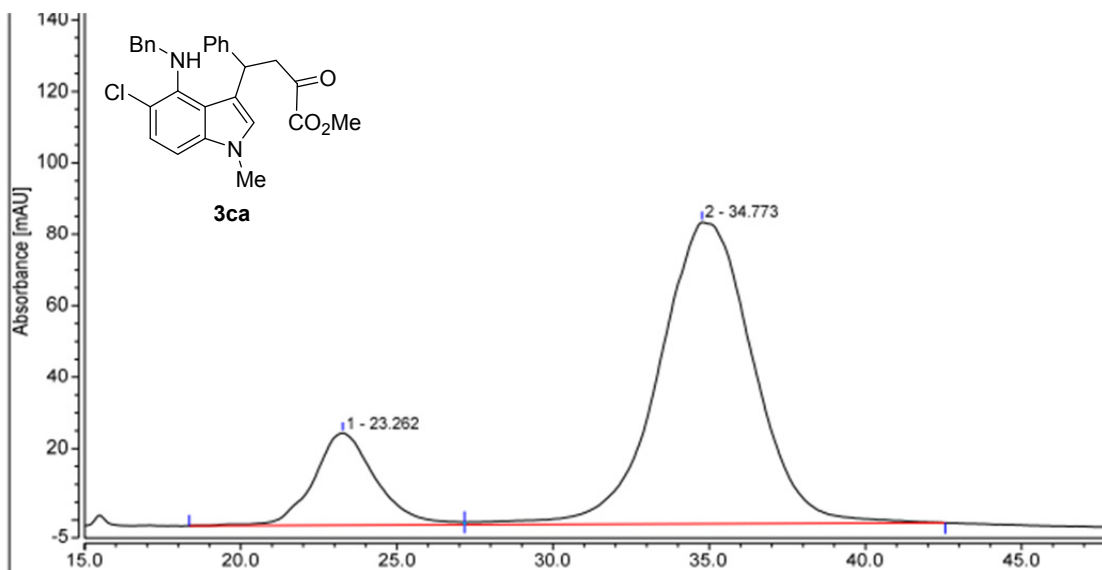

| Peak          | Retention Time<br>min | Area<br>mAU*min | Height<br>mAU  | Area<br>%     | Height<br>%   |
|---------------|-----------------------|-----------------|----------------|---------------|---------------|
| 1             | 23.262                | 59.644          | 25.776         | 16.77         | 23.39         |
| 2             | 34.773                | 295.964         | 84.421         | 83.23         | 76.61         |
| <b>Total:</b> |                       | <b>355.607</b>  | <b>110.198</b> | <b>100.00</b> | <b>100.00</b> |

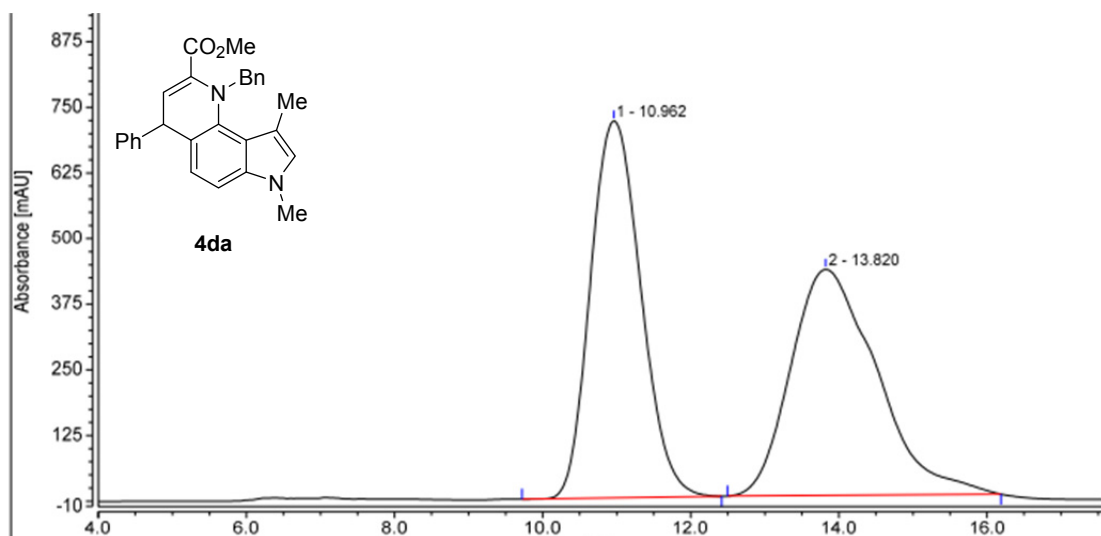

| Peak          | Retention Time min | Area mAU*min    | Height mAU      | Area %        | Height %      |
|---------------|--------------------|-----------------|-----------------|---------------|---------------|
| 1             | 10.962             | 565.330         | 717.800         | 49.49         | 62.53         |
| 2             | 13.820             | 577.095         | 430.132         | 50.51         | 37.47         |
| <b>Total:</b> |                    | <b>1142.425</b> | <b>1147.932</b> | <b>100.00</b> | <b>100.00</b> |

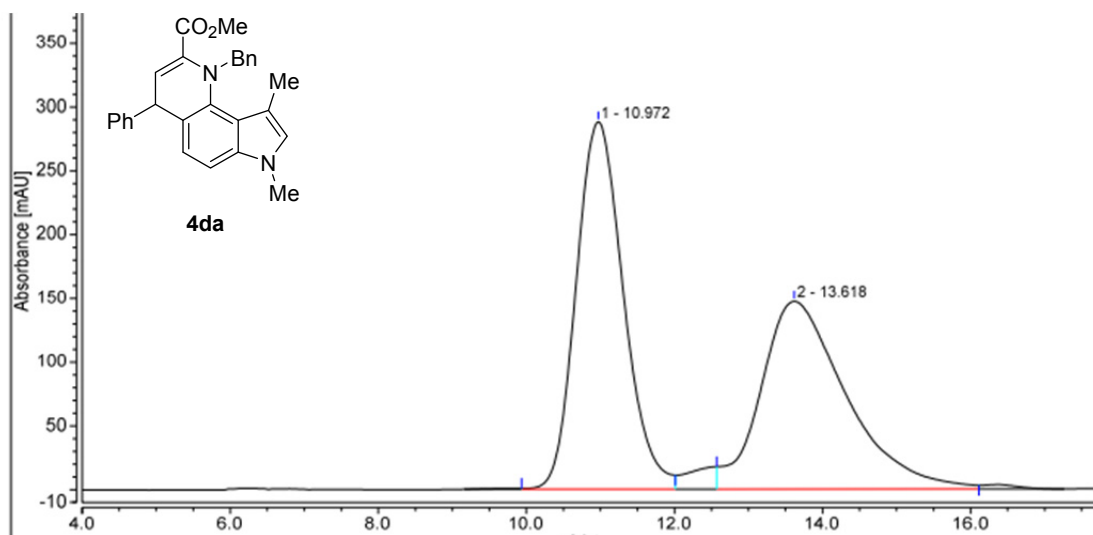

| Peak          | Retention Time min | Area mAU*min   | Height mAU     | Area %        | Height %      |
|---------------|--------------------|----------------|----------------|---------------|---------------|
| 1             | 10.972             | 212.575        | 288.082        | 52.04         | 66.16         |
| 2             | 13.618             | 195.902        | 147.322        | 47.96         | 33.84         |
| <b>Total:</b> |                    | <b>408.476</b> | <b>435.405</b> | <b>100.00</b> | <b>100.00</b> |

# NMR Spectra

## $^1\text{H}$ NMR Spectrum of 3aa (400 MHz, $\text{CDCl}_3$ )

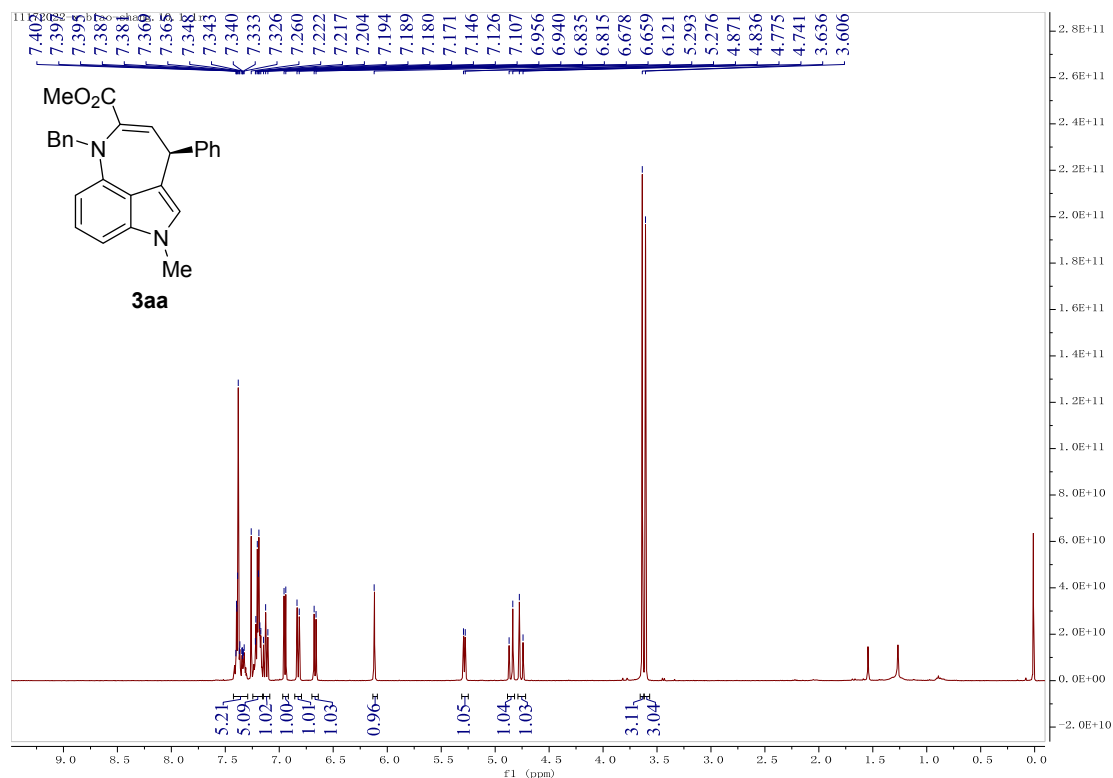

## $^{13}\text{C}\{^1\text{H}\}$ NMR Spectrum of 3aa (100 MHz, $\text{CDCl}_3$ )

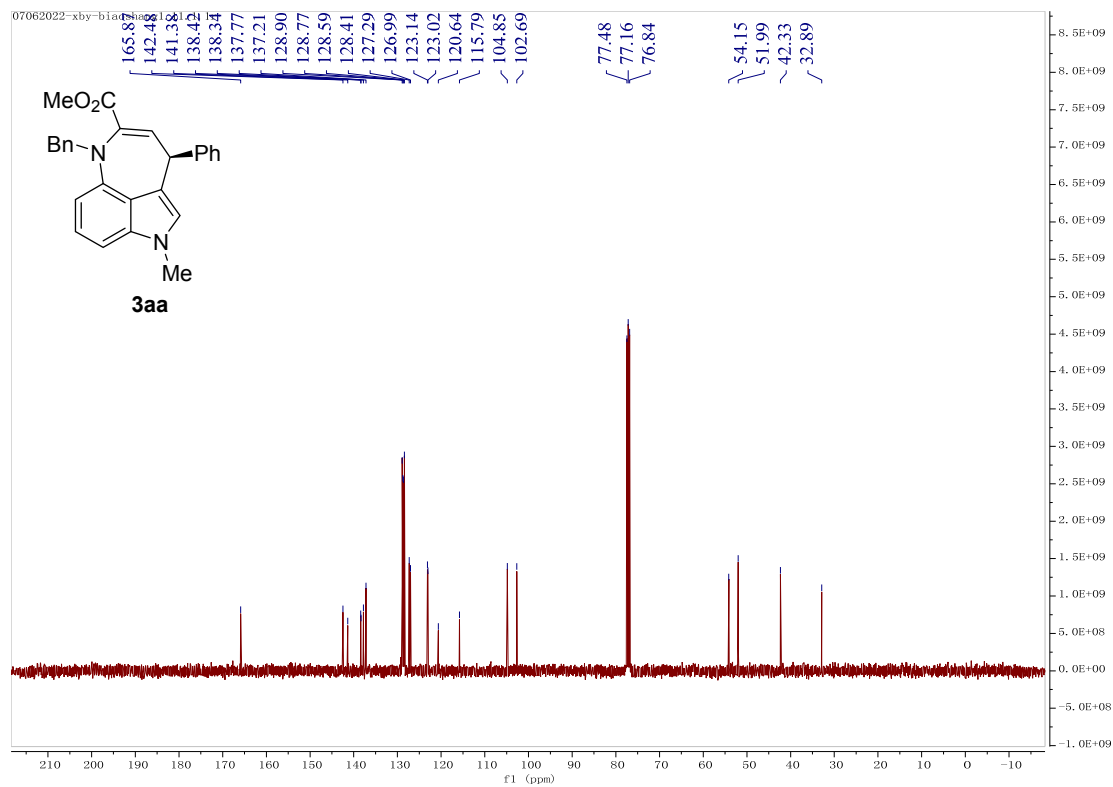



### <sup>1</sup>H NMR Spectrum of 4aa (400 MHz, CDCl<sub>3</sub>)

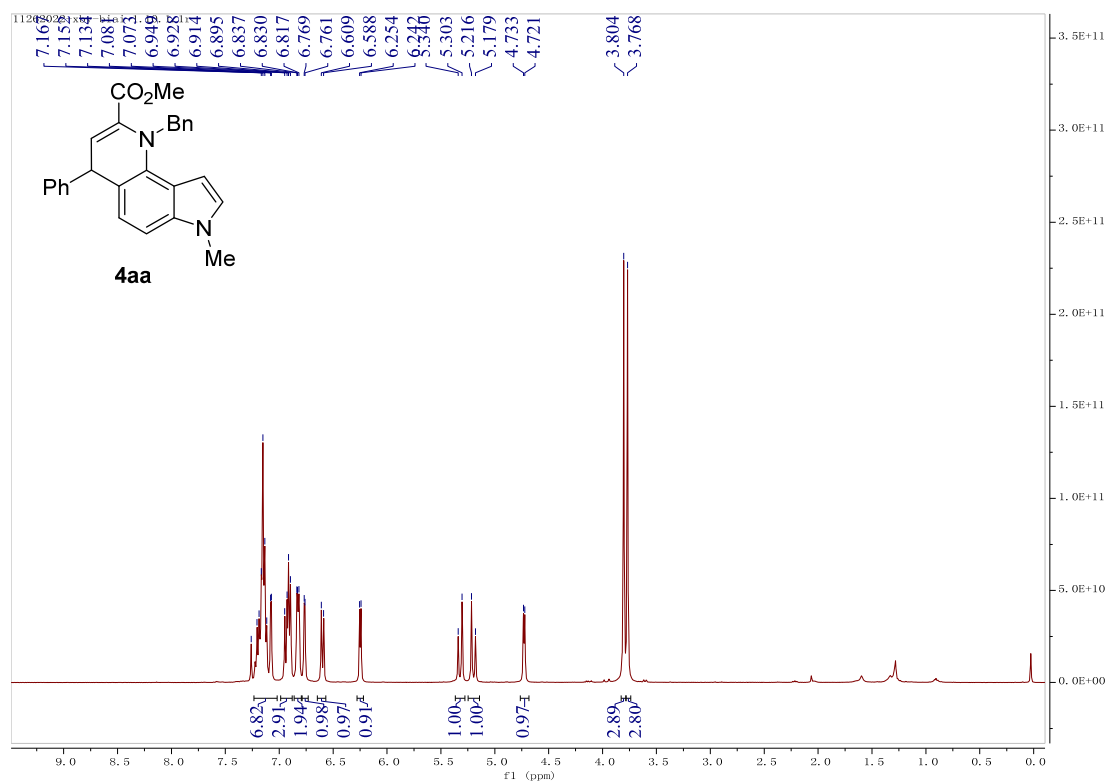

### <sup>13</sup>C{<sup>1</sup>H} NMR Spectrum of 4aa (100 MHz, CDCl<sub>3</sub>)

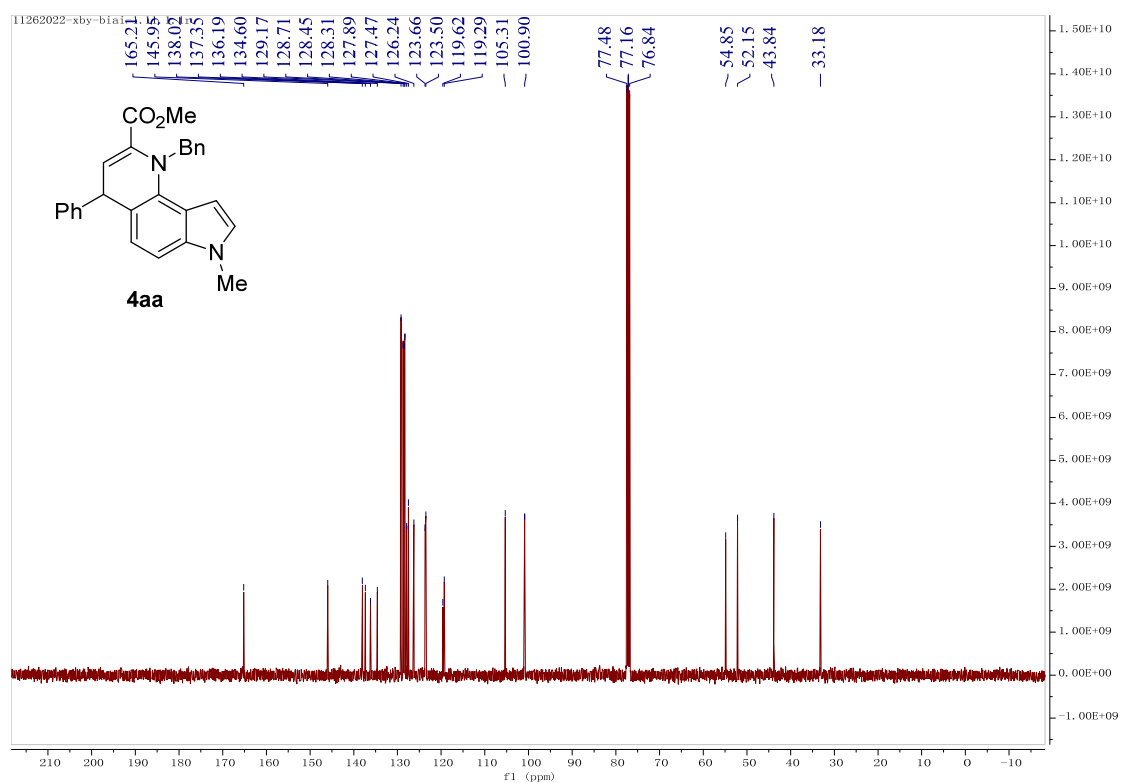

### <sup>1</sup>H NMR Spectrum of 3ab (600 MHz, CDCl<sub>3</sub>)

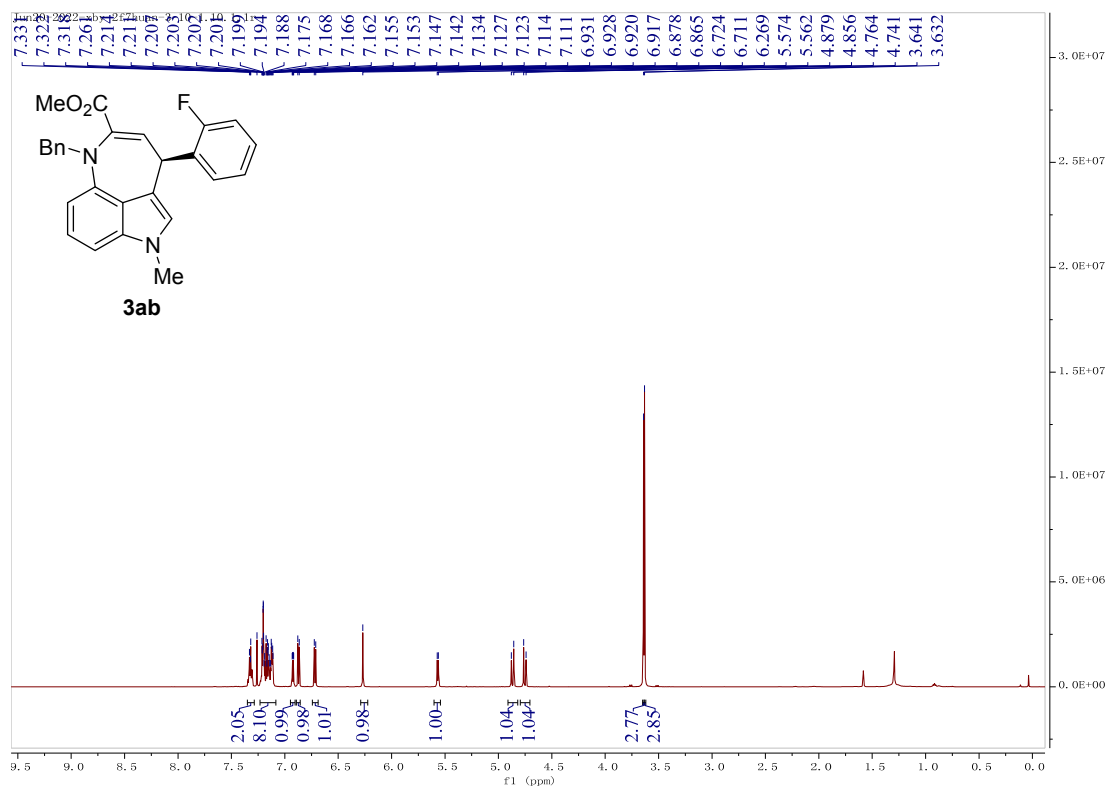

### <sup>13</sup>C{<sup>1</sup>H} NMR Spectrum of 3ab (100 MHz, CDCl<sub>3</sub>)

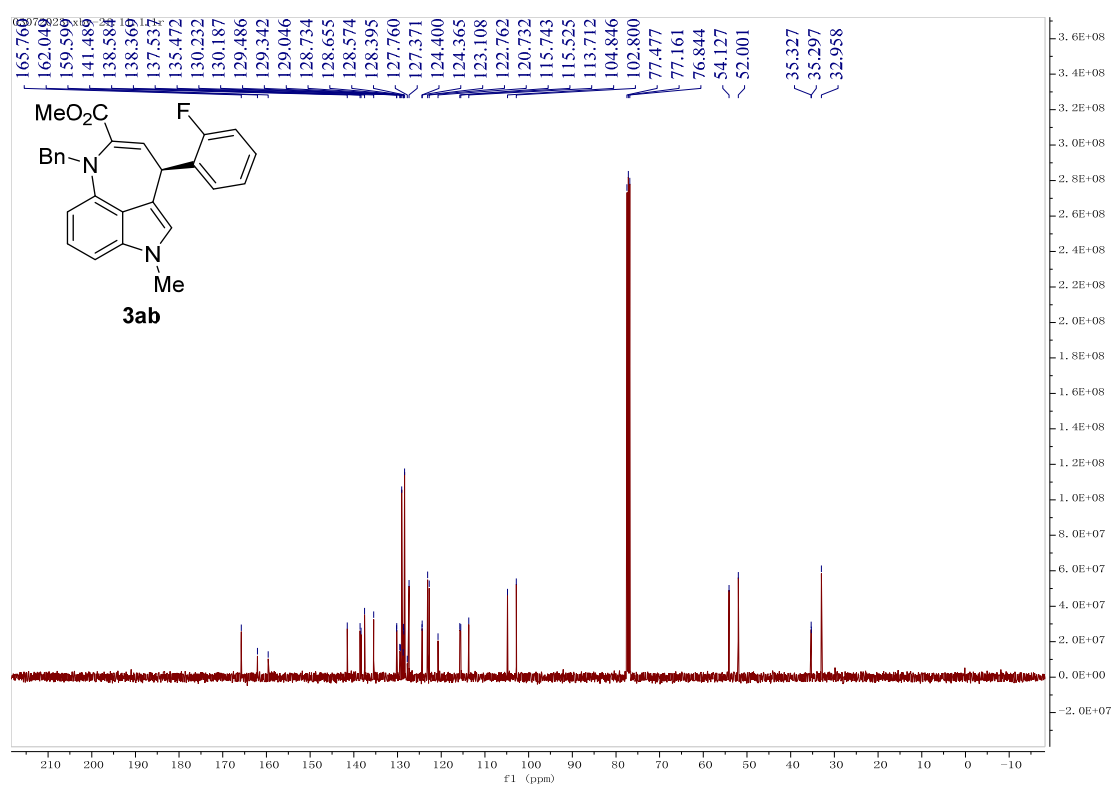

### <sup>1</sup>H NMR Spectrum of 3ac (600 MHz, CDCl<sub>3</sub>)

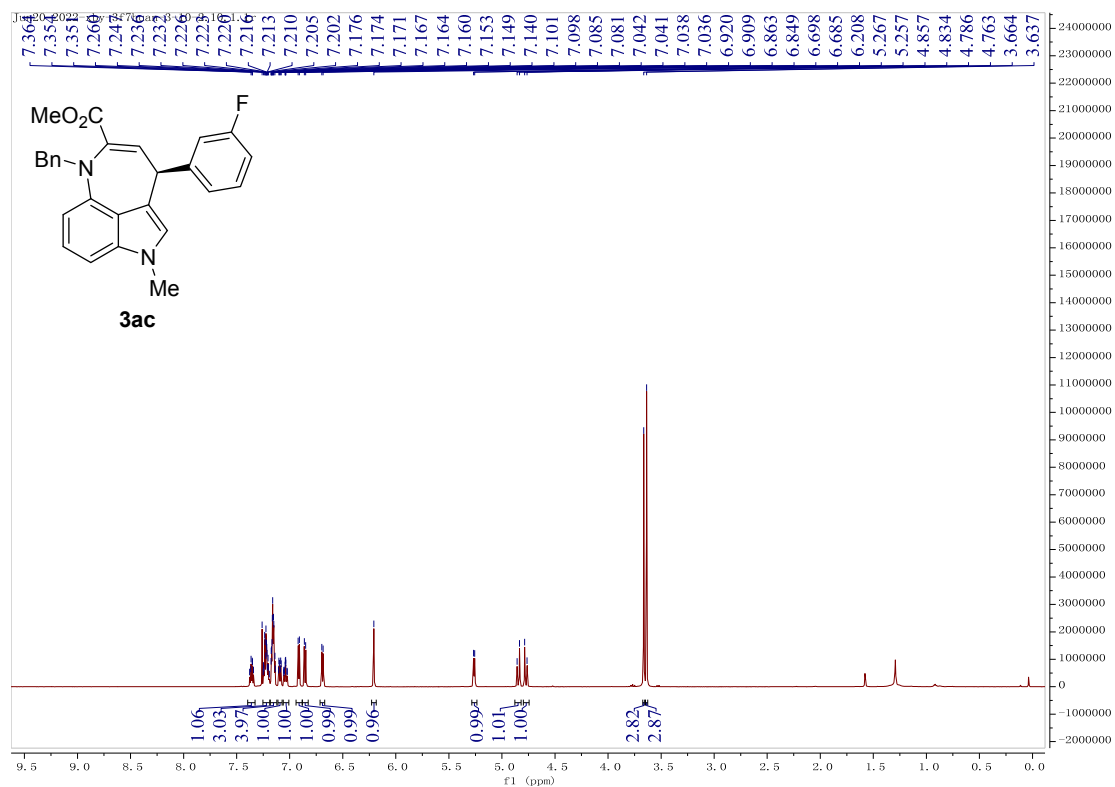

### <sup>13</sup>C{<sup>1</sup>H} NMR Spectrum of 3ac (150 MHz, CDCl<sub>3</sub>)

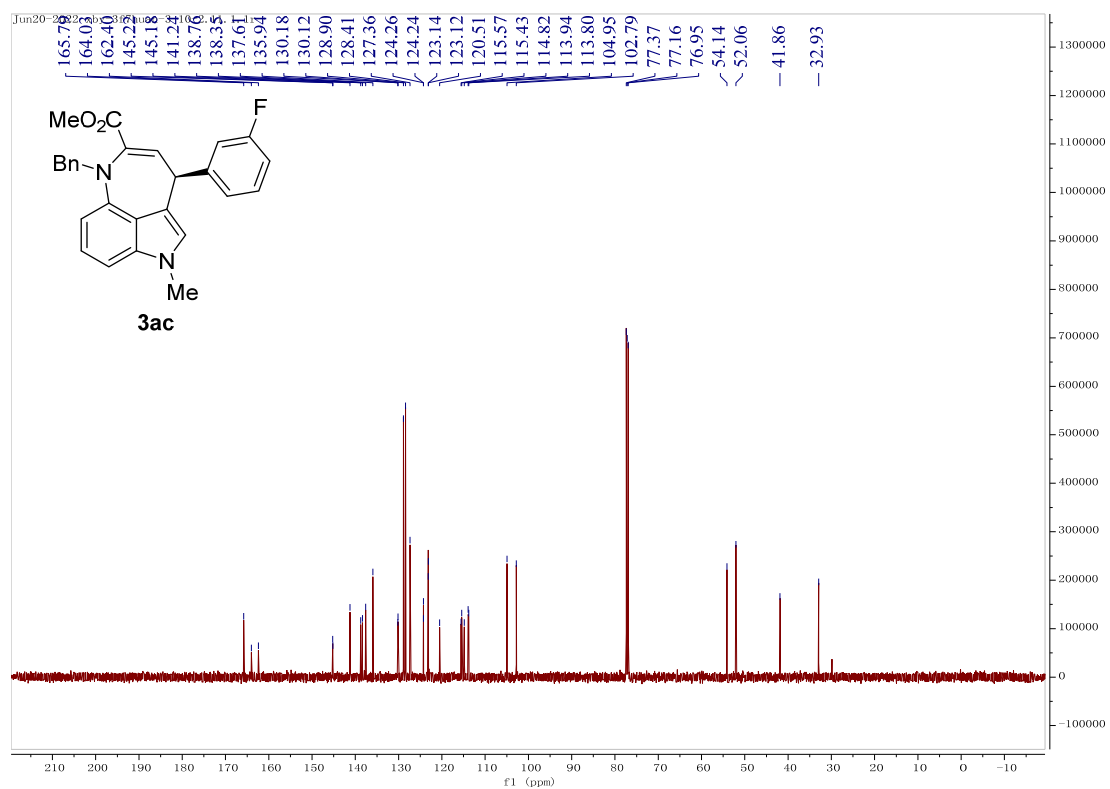

### $^1\text{H}$ NMR Spectrum of 3ad (600 MHz, $\text{CDCl}_3$ )

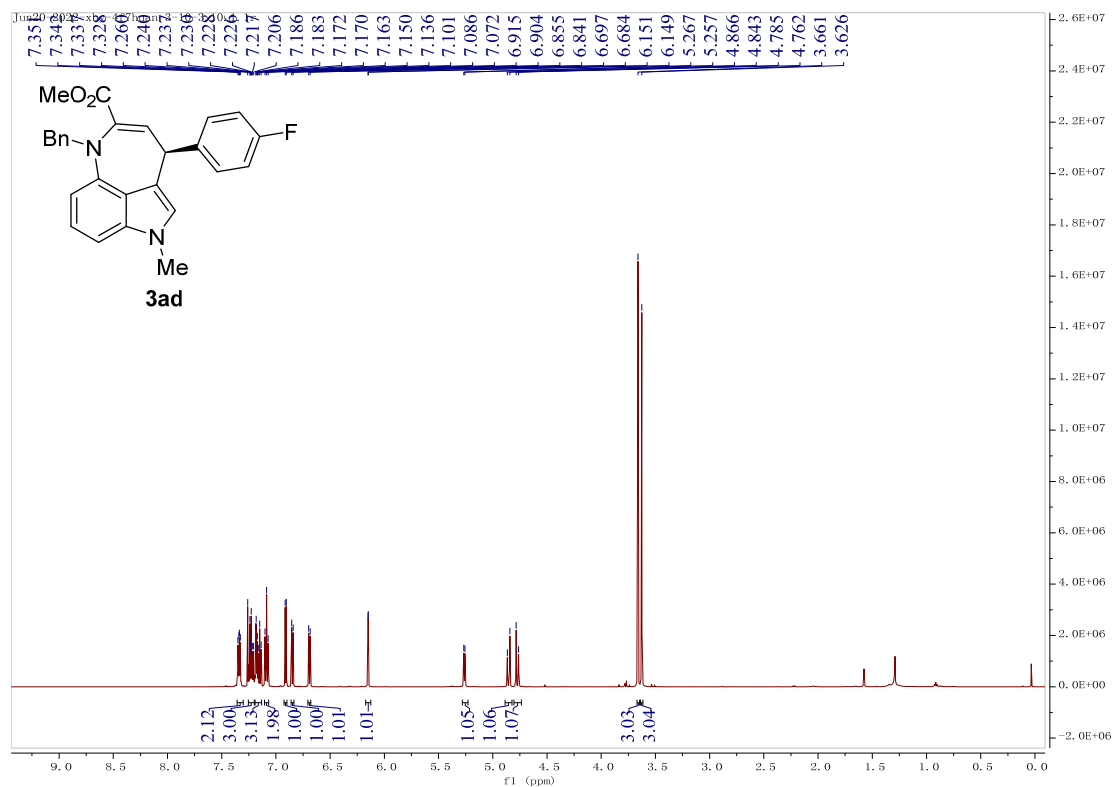

### $^{13}\text{C}\{^1\text{H}\}$ NMR Spectrum of 3ad (150 MHz, $\text{CDCl}_3$ )

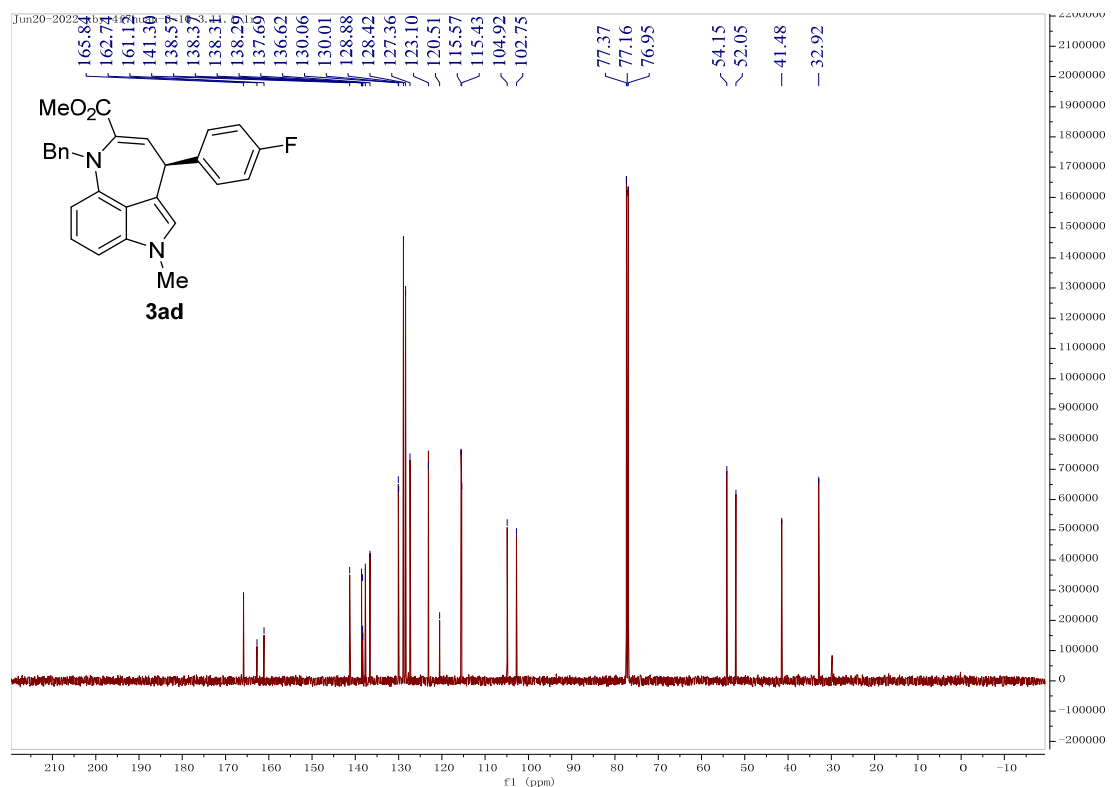

### <sup>1</sup>H NMR Spectrum of 3ae (600 MHz, CDCl<sub>3</sub>)

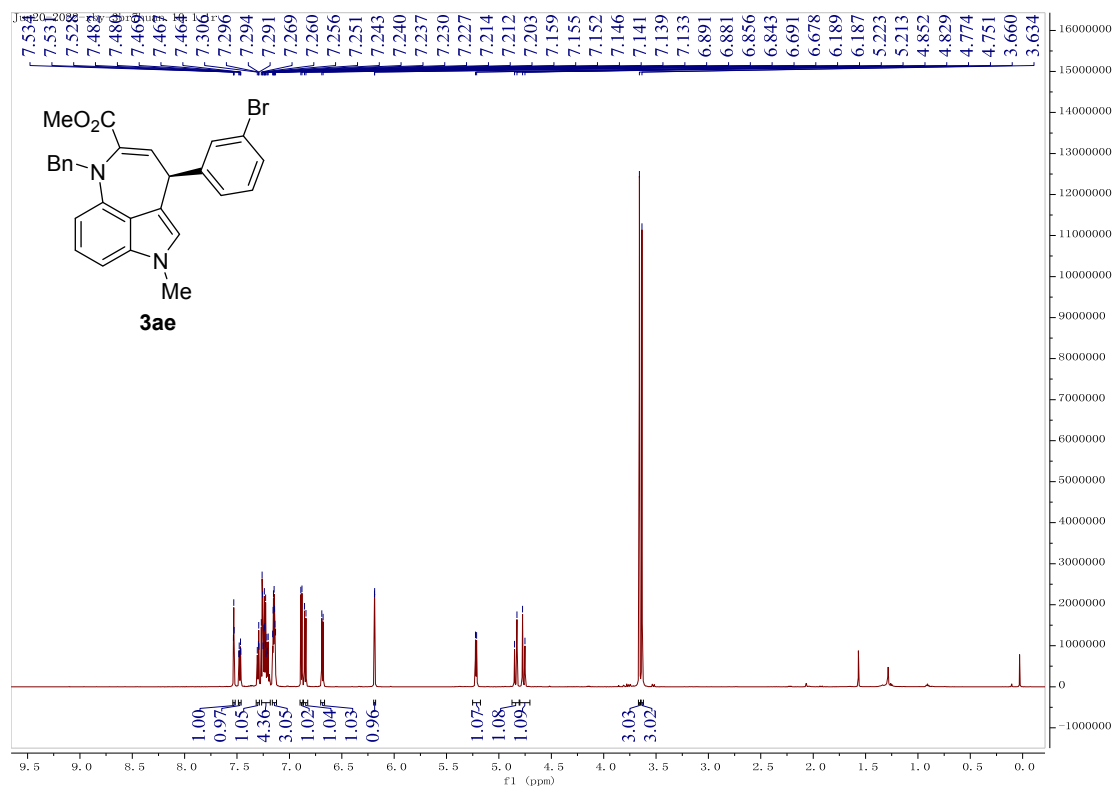

### <sup>13</sup>C{<sup>1</sup>H} NMR Spectrum of 3ae (150 MHz, CDCl<sub>3</sub>)

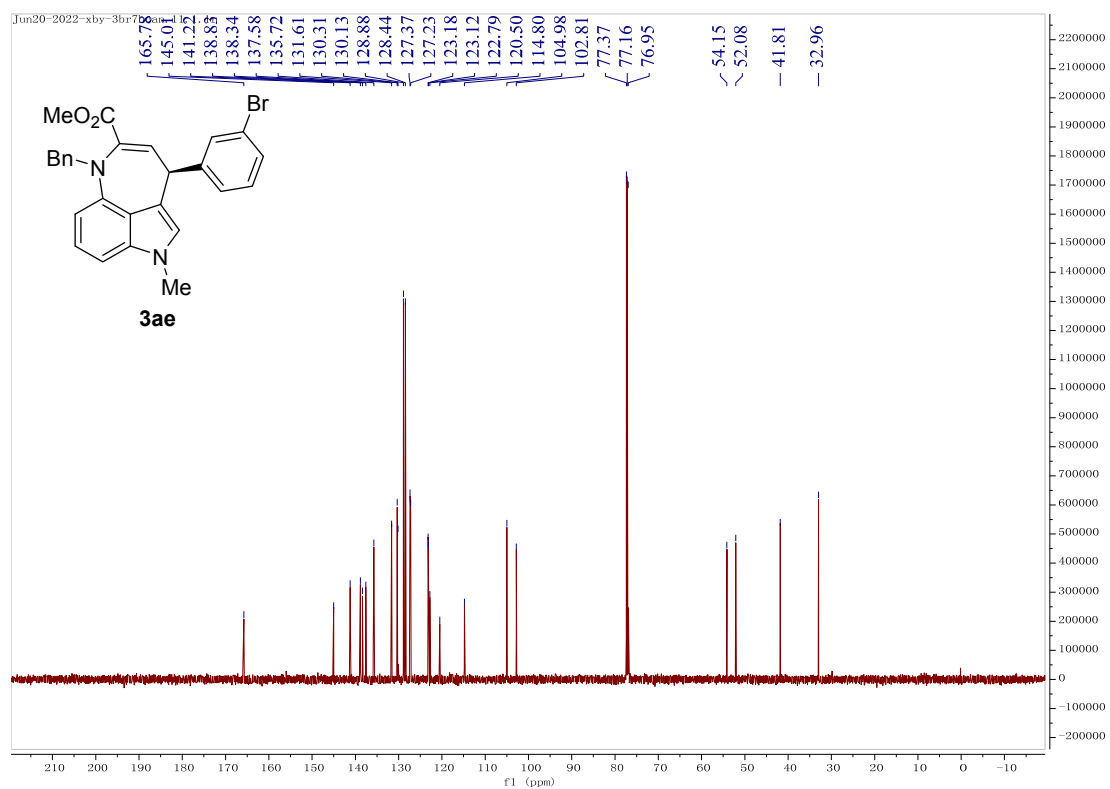

### <sup>1</sup>H NMR Spectrum of 3af (600 MHz, CDCl<sub>3</sub>)

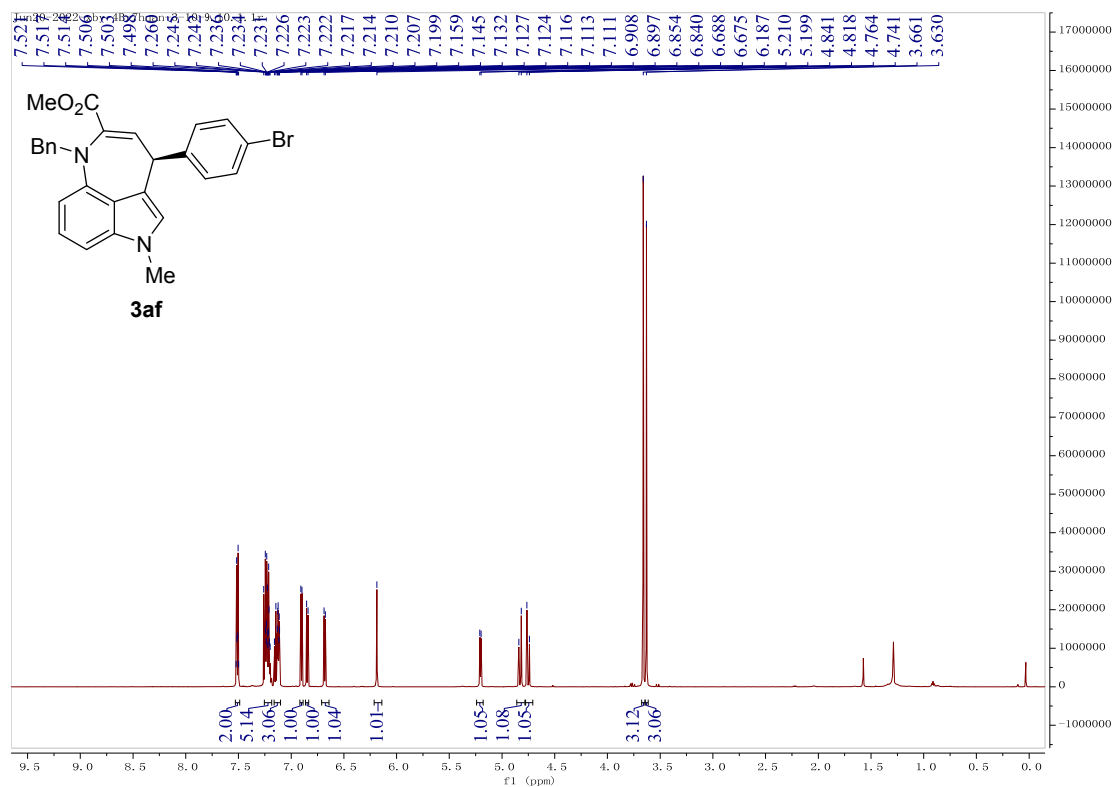

### <sup>13</sup>C{<sup>1</sup>H} NMR Spectrum of 3af (150 MHz, CDCl<sub>3</sub>)

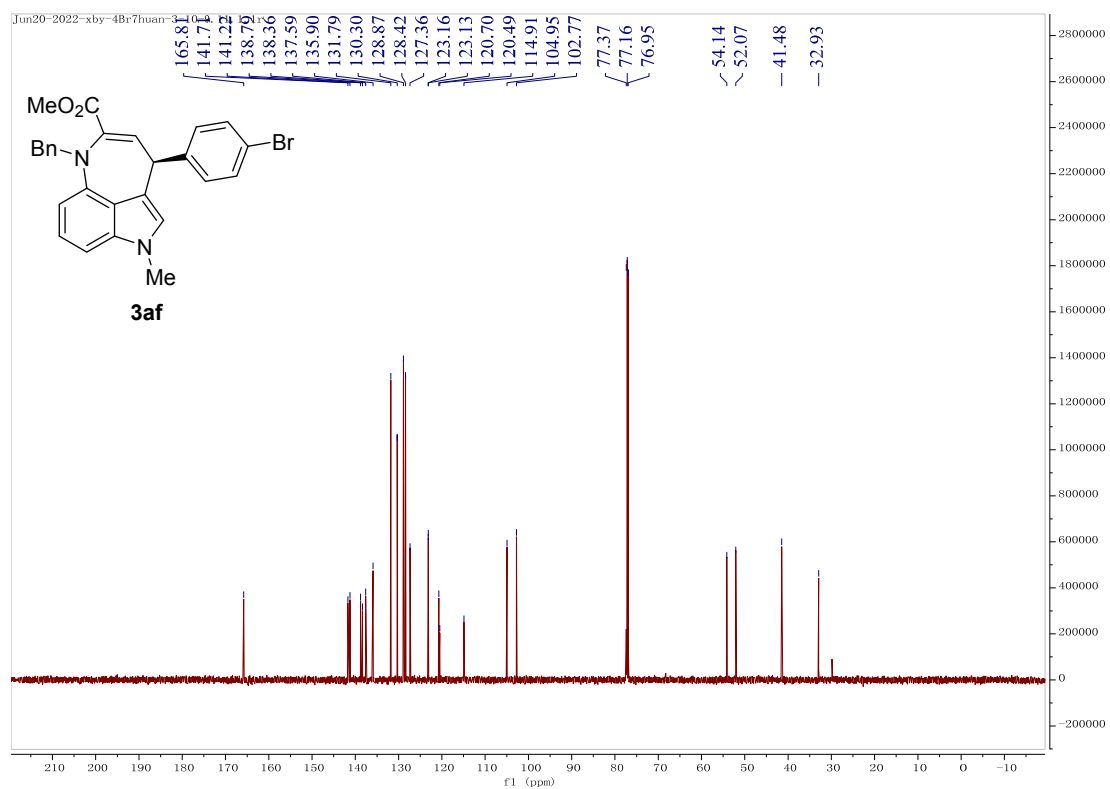

### <sup>1</sup>H NMR Spectrum of 4af (600 MHz, CDCl<sub>3</sub>)

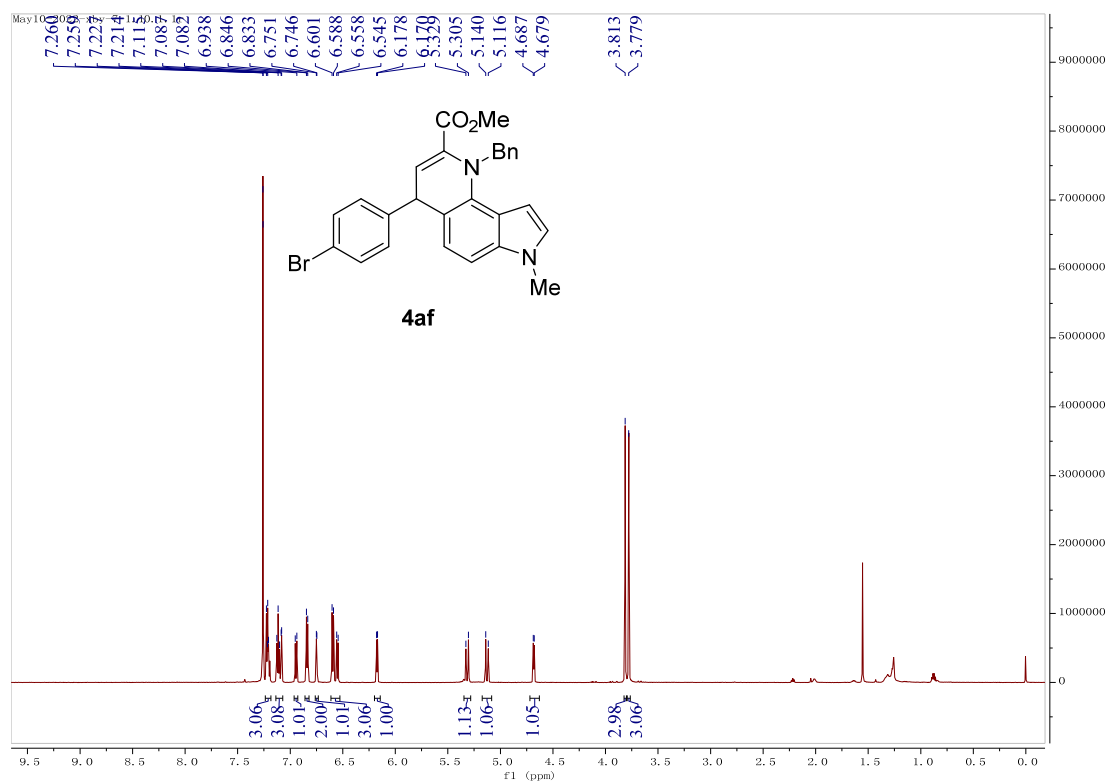

### <sup>13</sup>C{<sup>1</sup>H} NMR Spectrum of 4af (150 MHz, CDCl<sub>3</sub>)

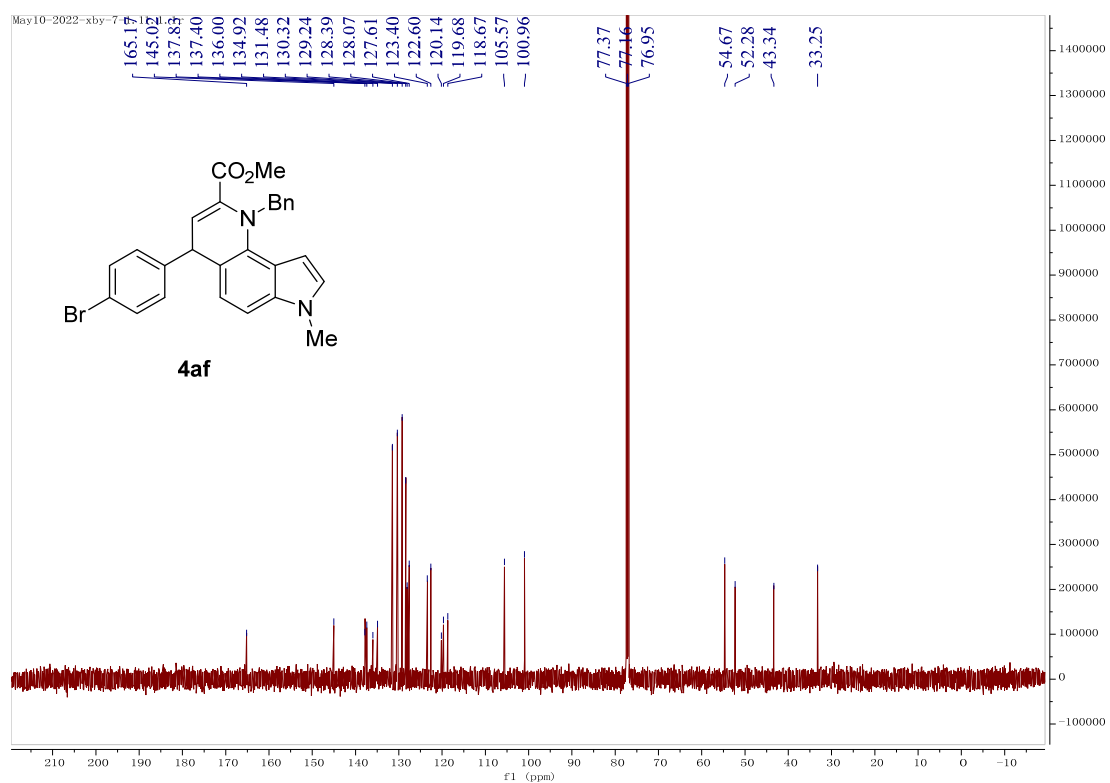

### $^1\text{H}$ NMR Spectrum of 3ag (600 MHz, $\text{CDCl}_3$ )

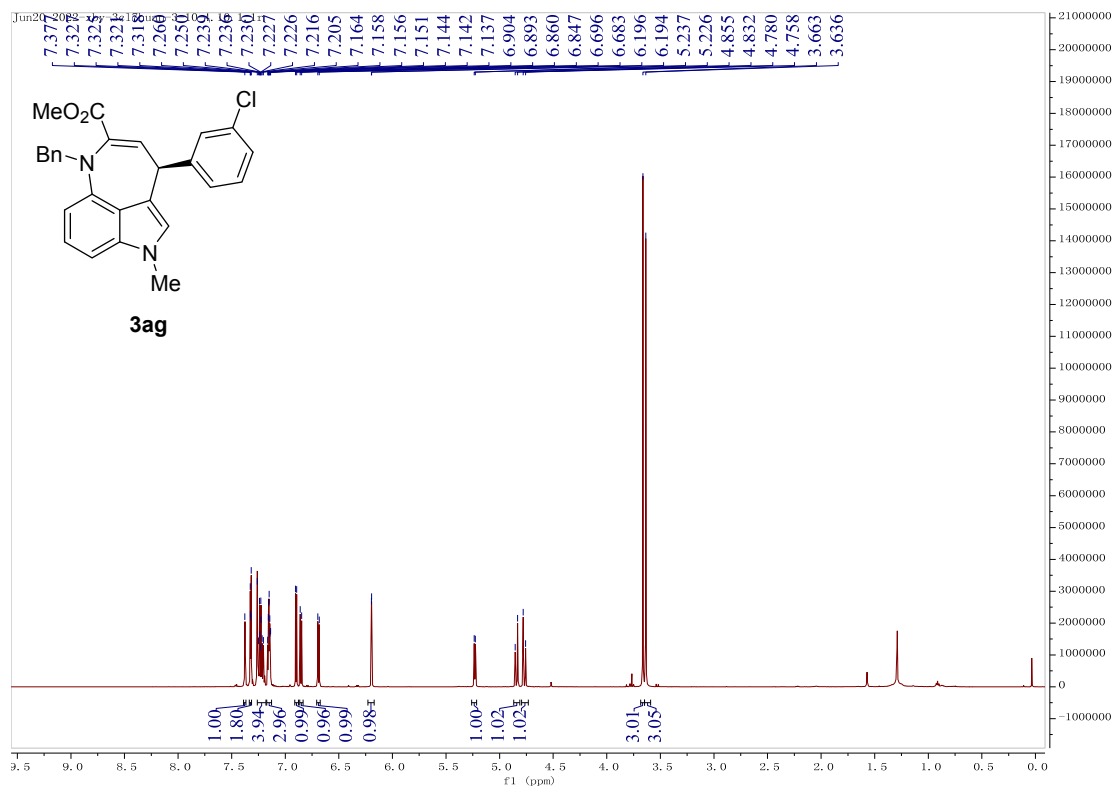

### $^{13}\text{C}\{^1\text{H}\}$ NMR Spectrum of 3ag (150 MHz, $\text{CDCl}_3$ )

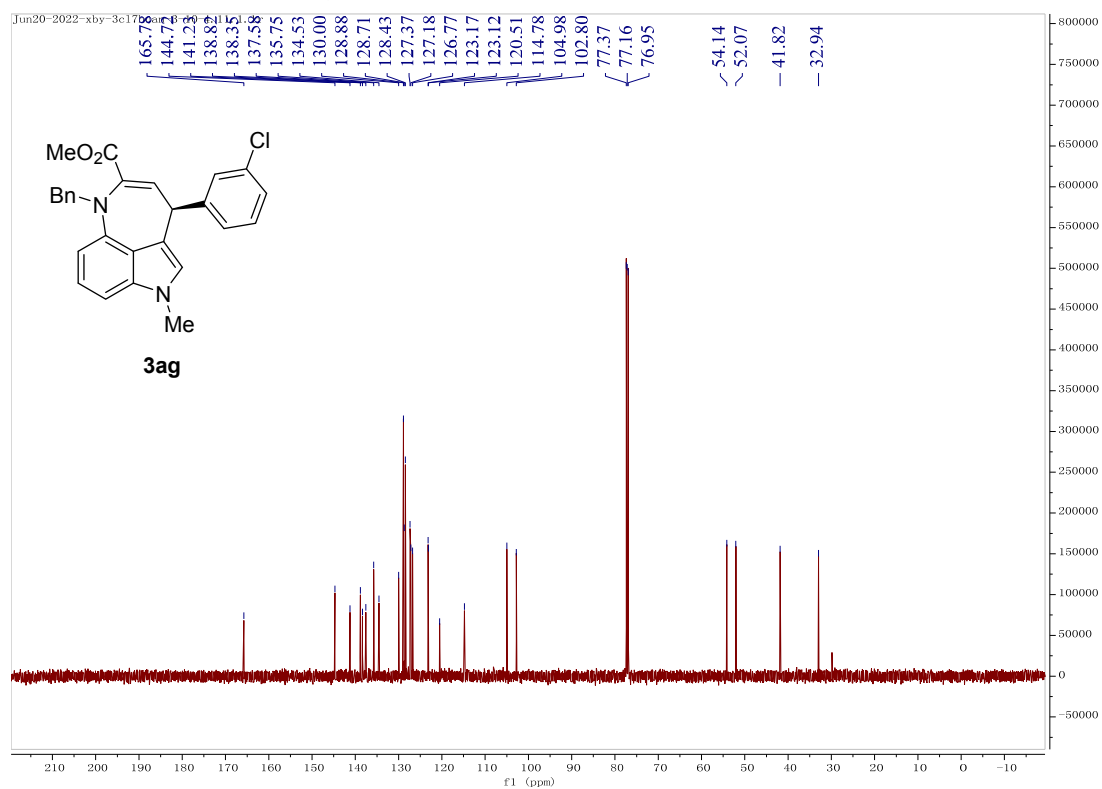



### <sup>1</sup>H NMR Spectrum of 3ah (600 MHz, CDCl<sub>3</sub>)

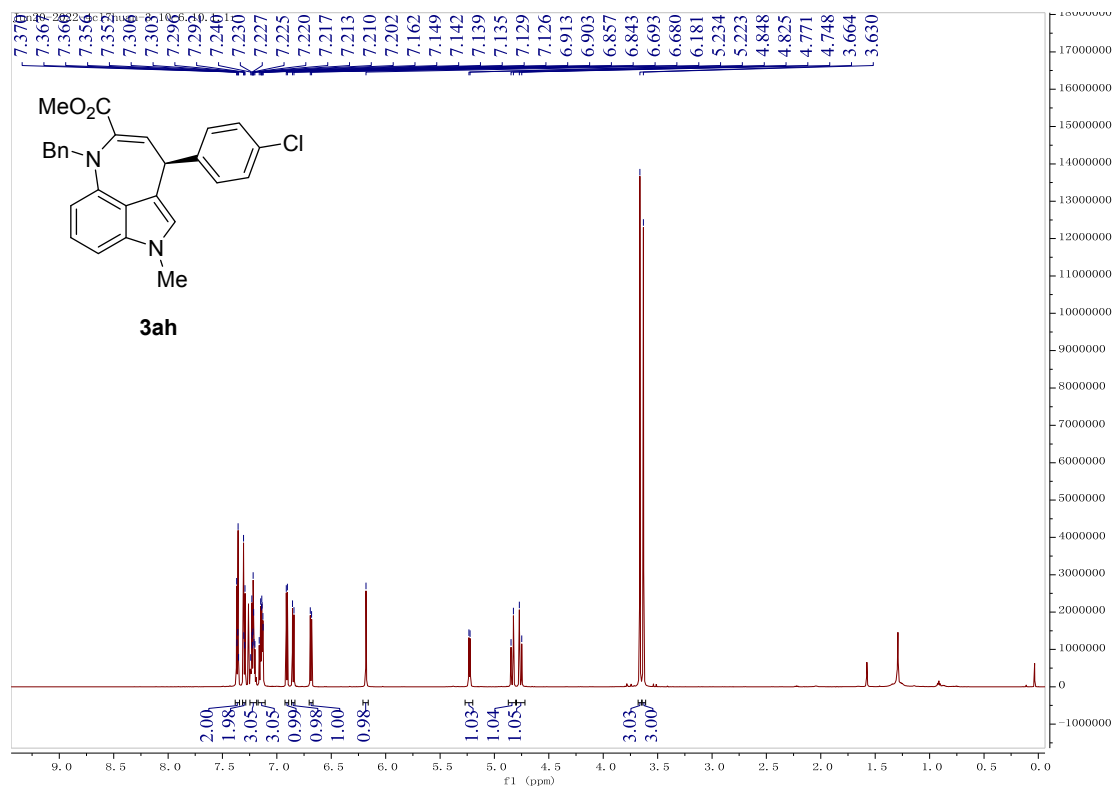

### <sup>13</sup>C{<sup>1</sup>H} NMR Spectrum of 3ah (150 MHz, CDCl<sub>3</sub>)

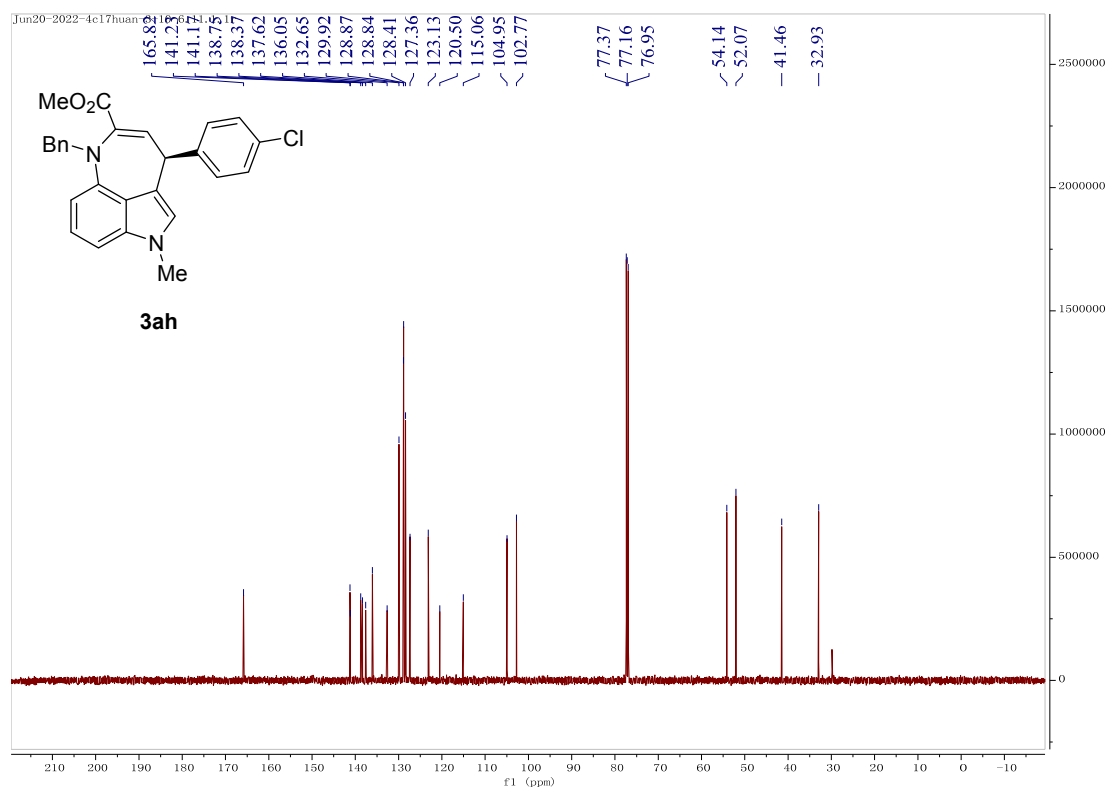

### <sup>1</sup>H NMR Spectrum of 3ai (600 MHz, CDCl<sub>3</sub>)

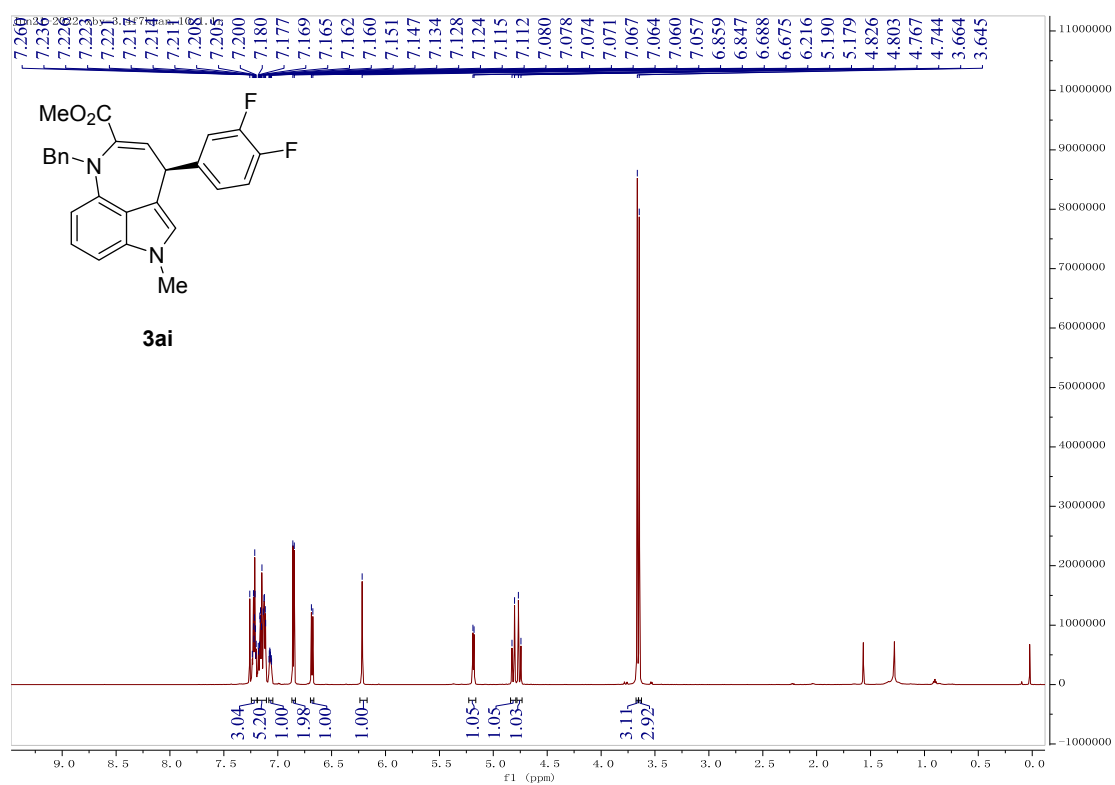

### <sup>13</sup>C{<sup>1</sup>H} NMR Spectrum of 3ai(150 MHz, CDCl<sub>3</sub>)

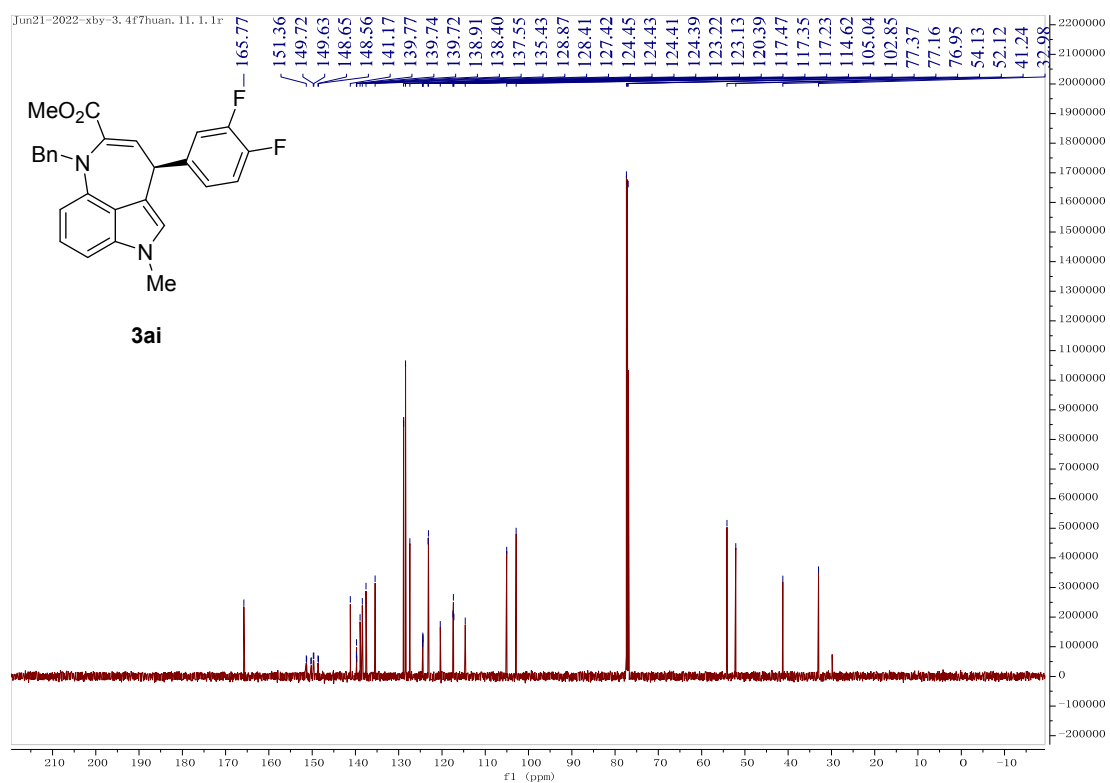

### <sup>1</sup>H NMR Spectrum of 3aj (600 MHz, CDCl<sub>3</sub>)

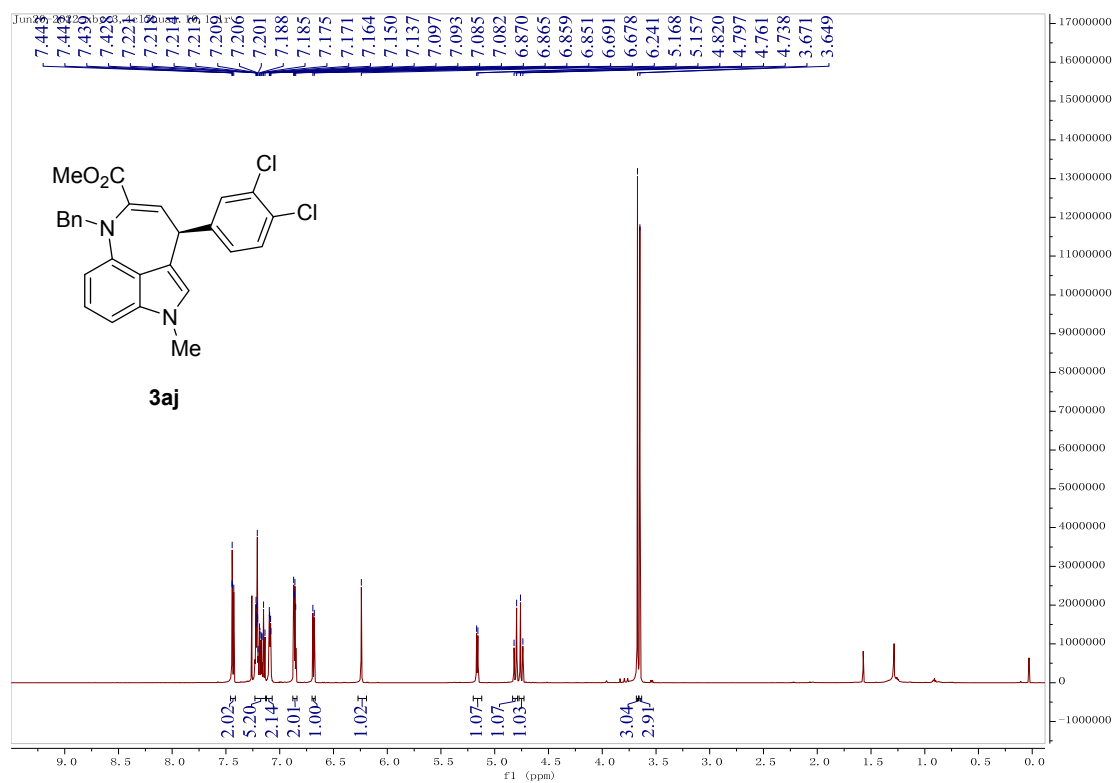

### <sup>13</sup>C{<sup>1</sup>H} NMR Spectrum of 3aj (150 MHz, CDCl<sub>3</sub>)

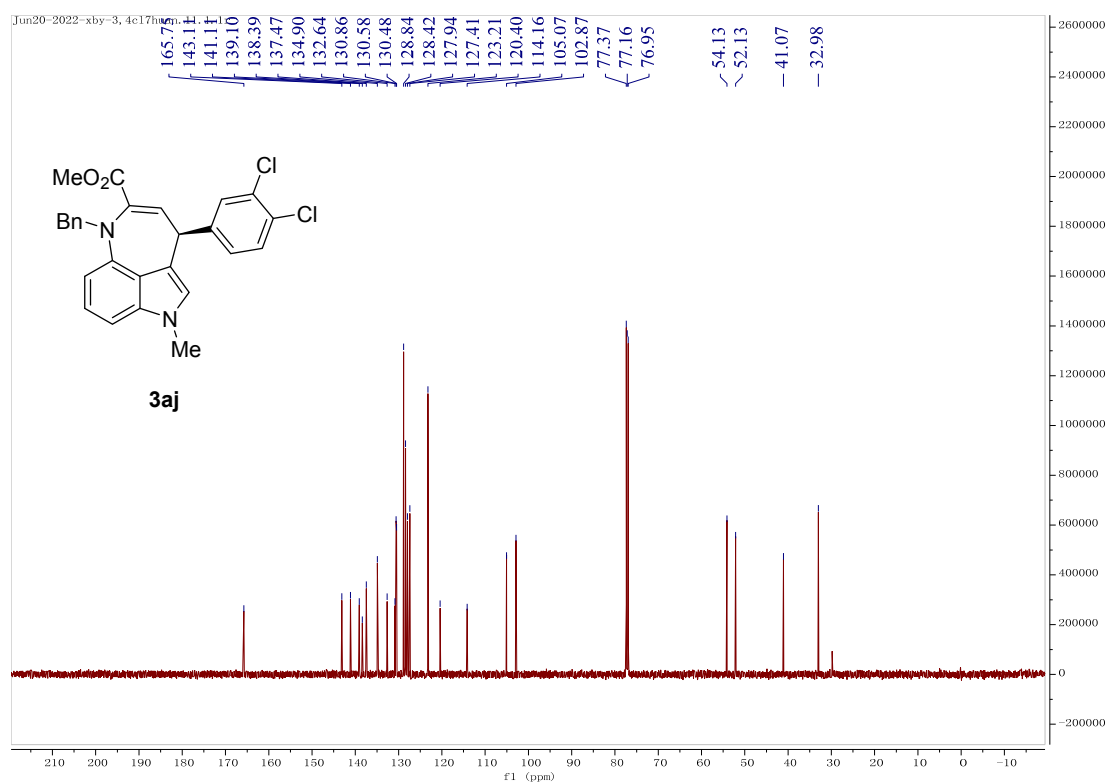

### <sup>1</sup>H NMR Spectrum of 3ak (400 MHz, CDCl<sub>3</sub>)

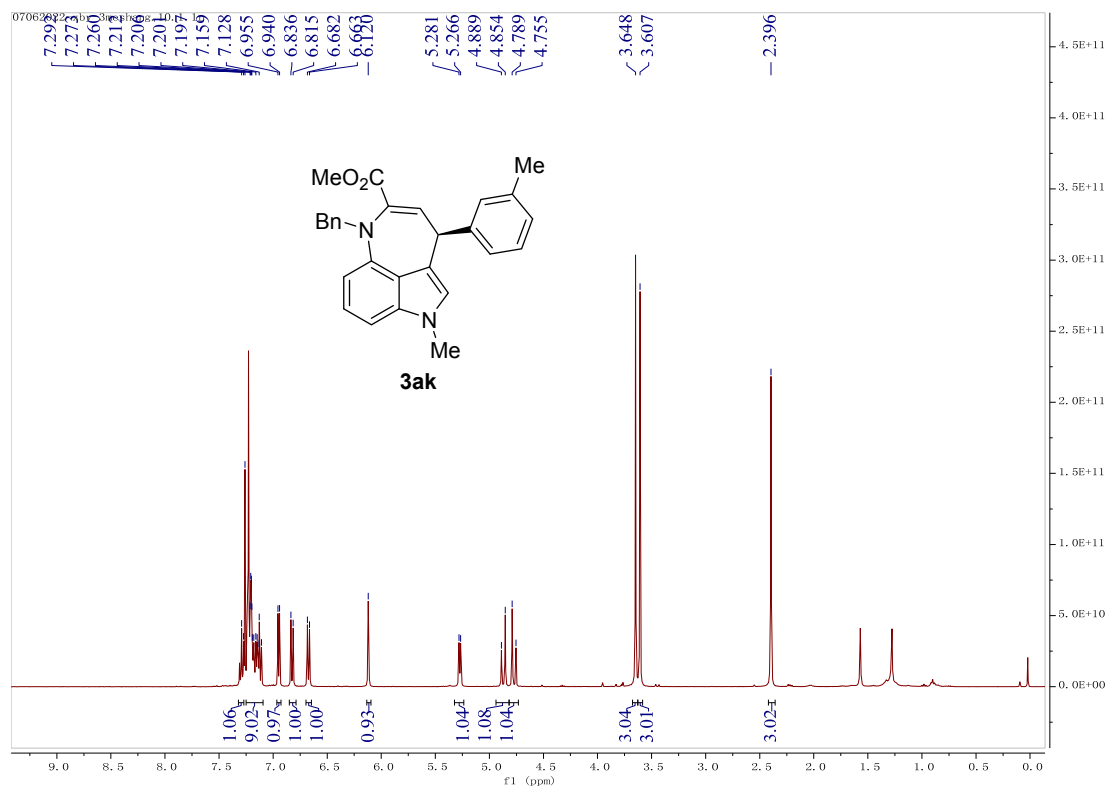

### <sup>13</sup>C{<sup>1</sup>H} NMR Spectrum of 3ak (100 MHz, CDCl<sub>3</sub>)

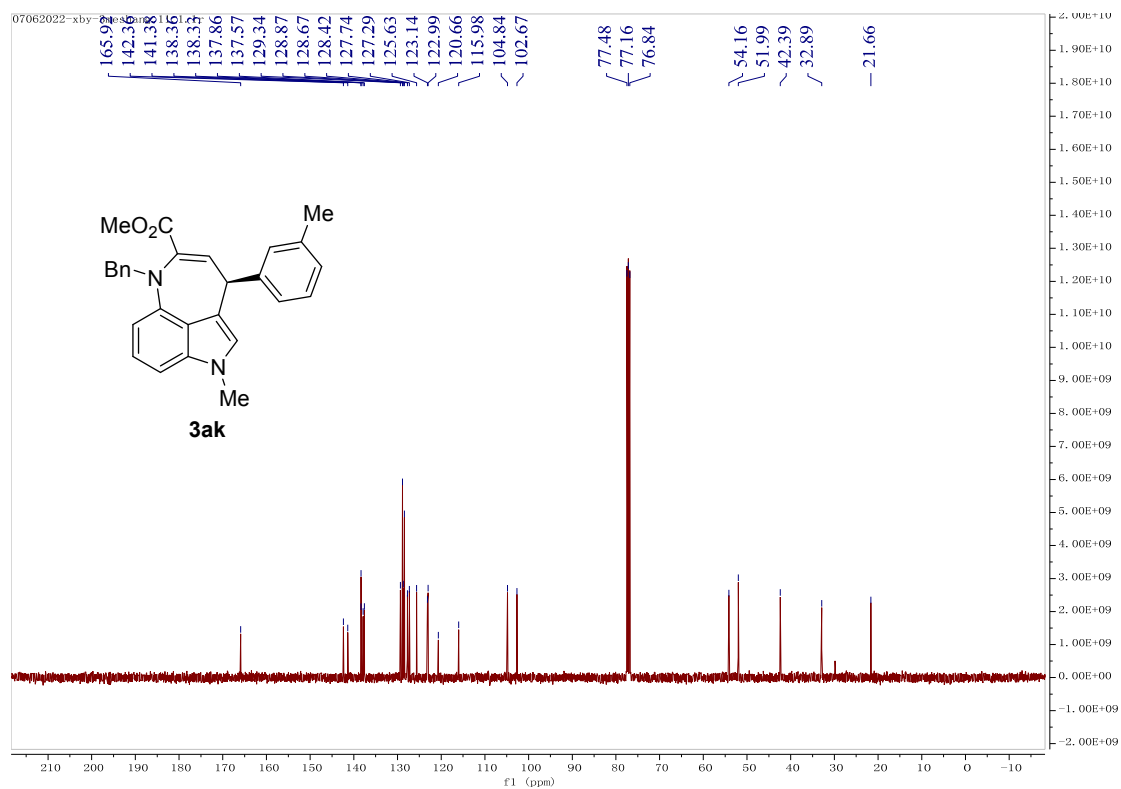

### $^1\text{H}$ NMR Spectrum of 3aI (600 MHz, $\text{CDCl}_3$ )

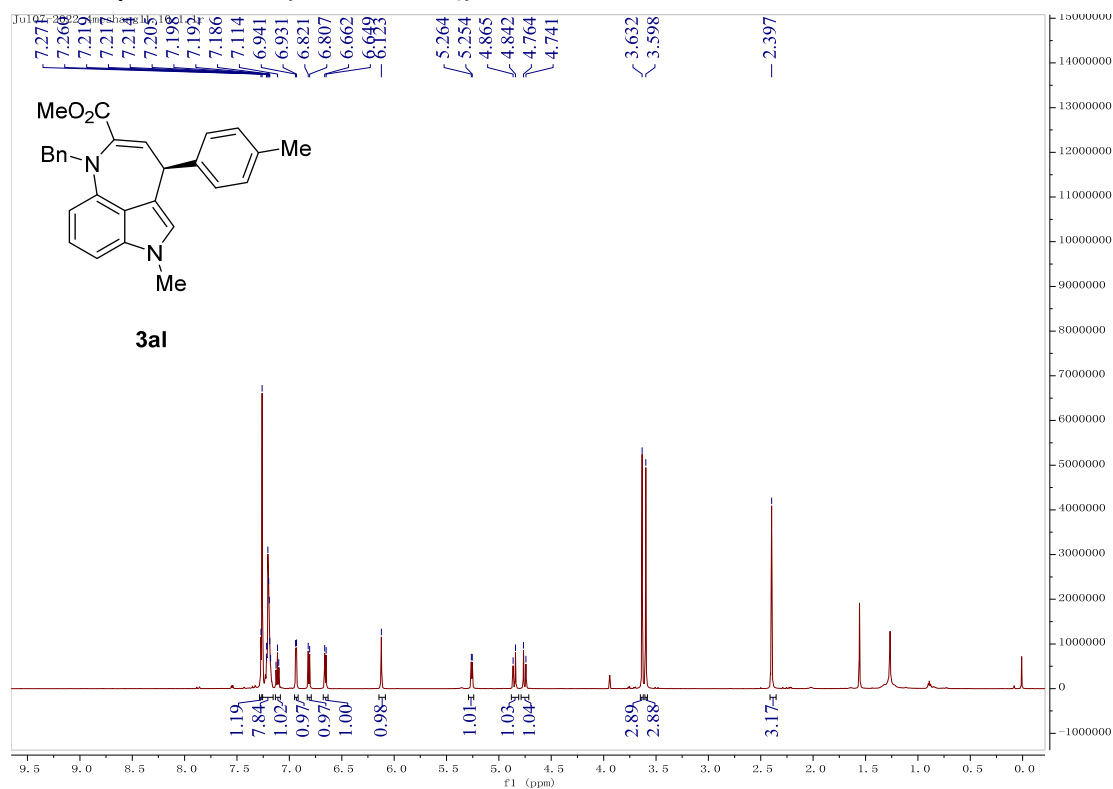

### $^{13}\text{C}\{^1\text{H}\}$ NMR Spectrum of 3aI (150 MHz, $\text{CDCl}_3$ )

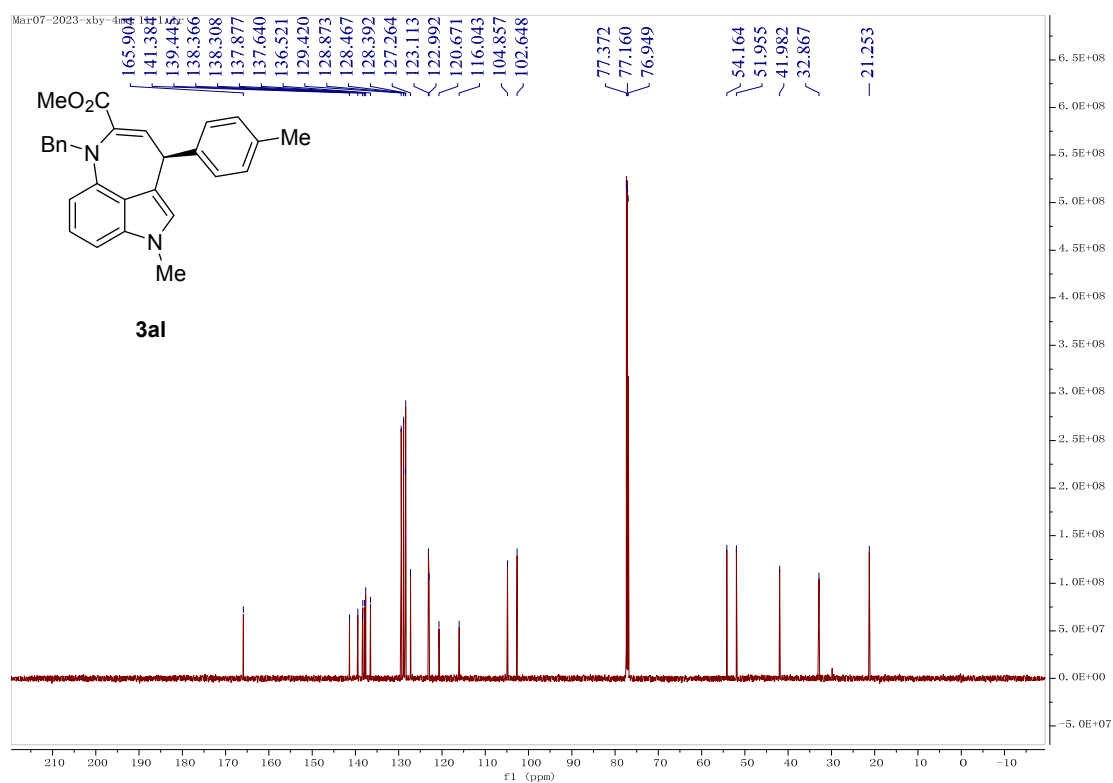

### <sup>1</sup>H NMR Spectrum of 3am (400 MHz, CDCl<sub>3</sub>)

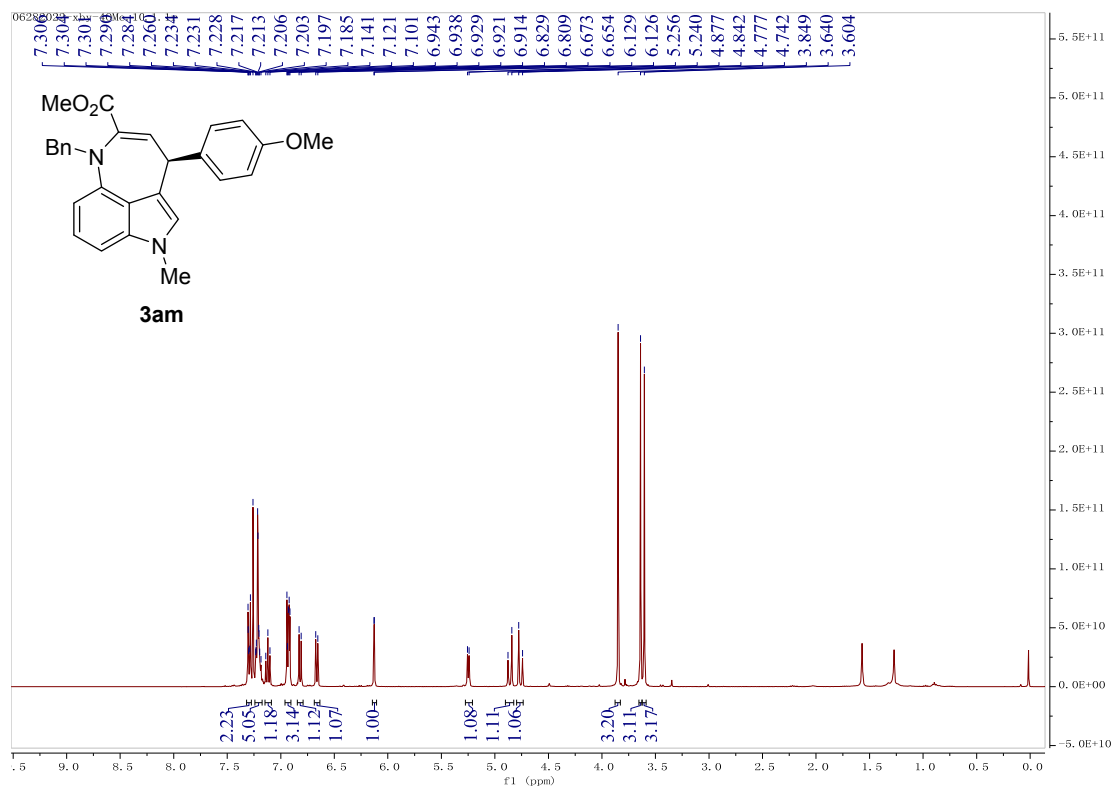

### <sup>13</sup>C{<sup>1</sup>H} NMR Spectrum of 3am (100 MHz, CDCl<sub>3</sub>)

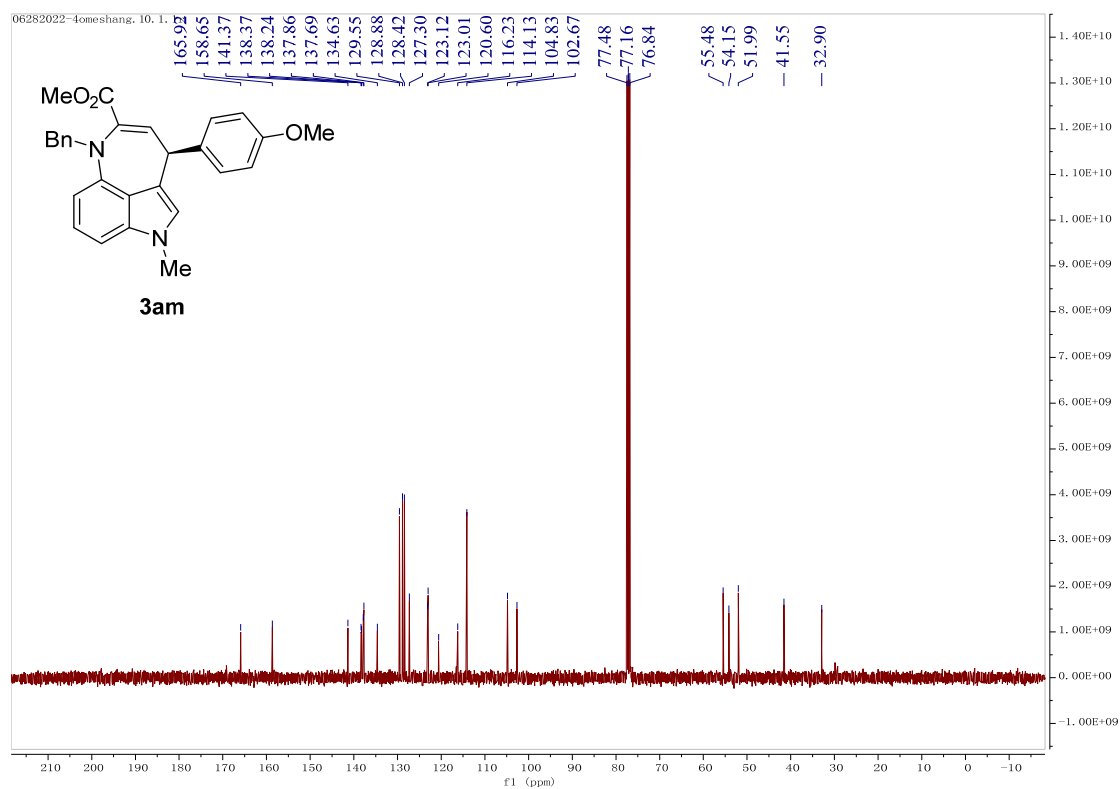

### <sup>1</sup>H NMR Spectrum of 3an (600 MHz, CDCl<sub>3</sub>)

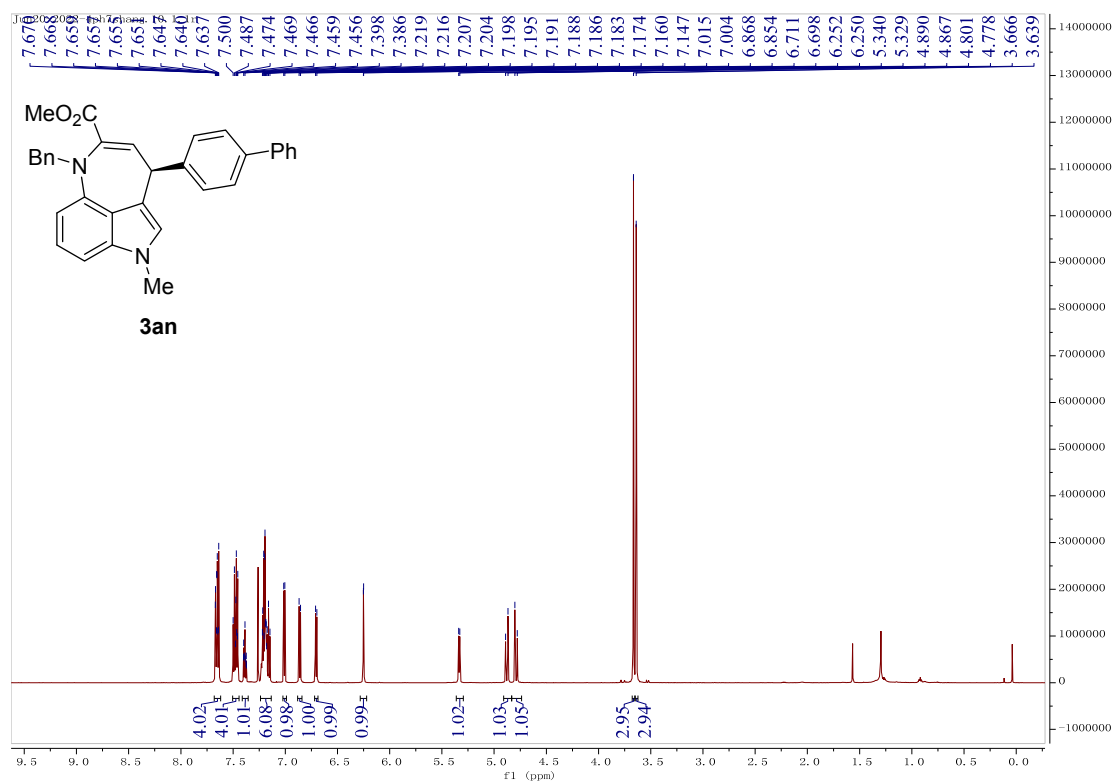

### <sup>13</sup>C{<sup>1</sup>H} NMR Spectrum of 3an (150 MHz, CDCl<sub>3</sub>)

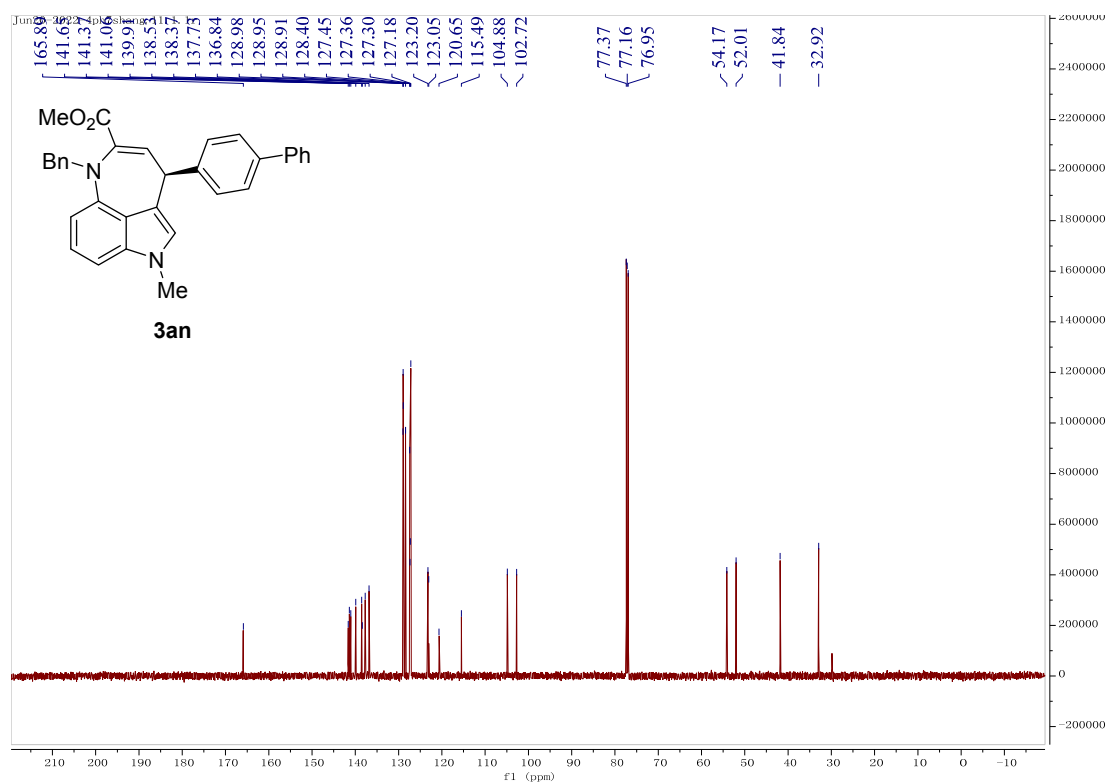

### <sup>1</sup>H NMR Spectrum of 3ao (600 MHz, CDCl<sub>3</sub>)

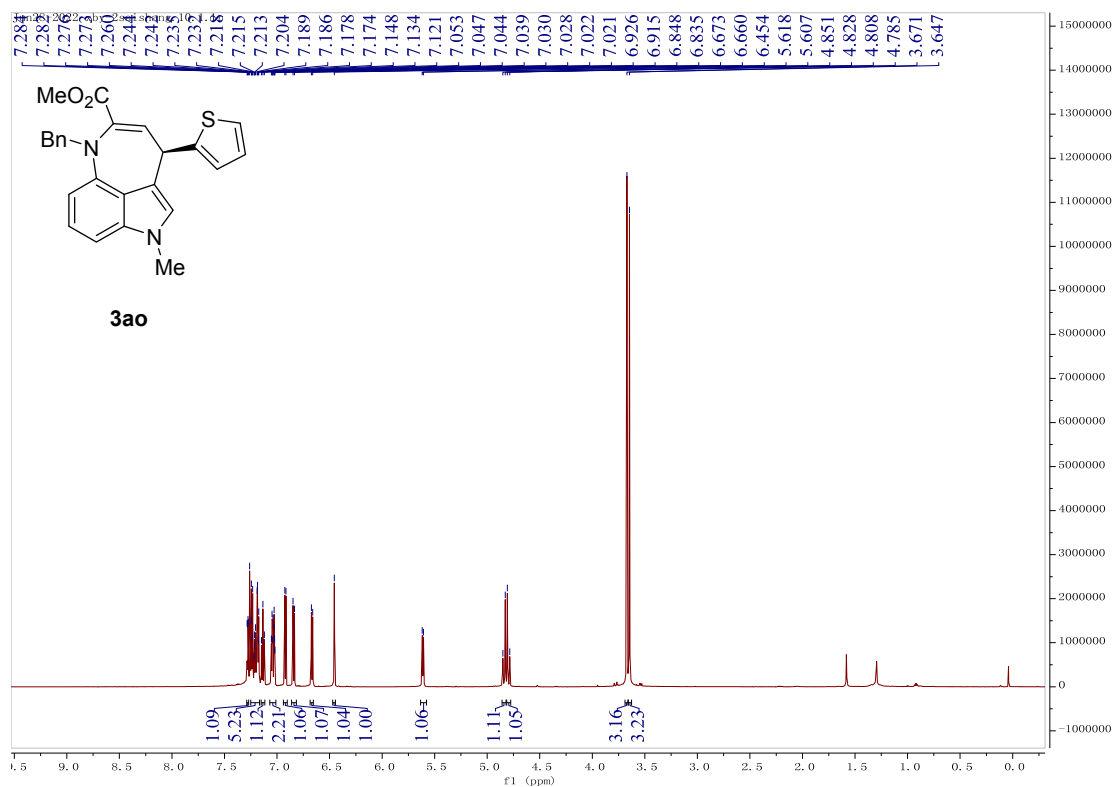

### <sup>13</sup>C{<sup>1</sup>H} NMR Spectrum of 3ao (150 MHz, CDCl<sub>3</sub>)

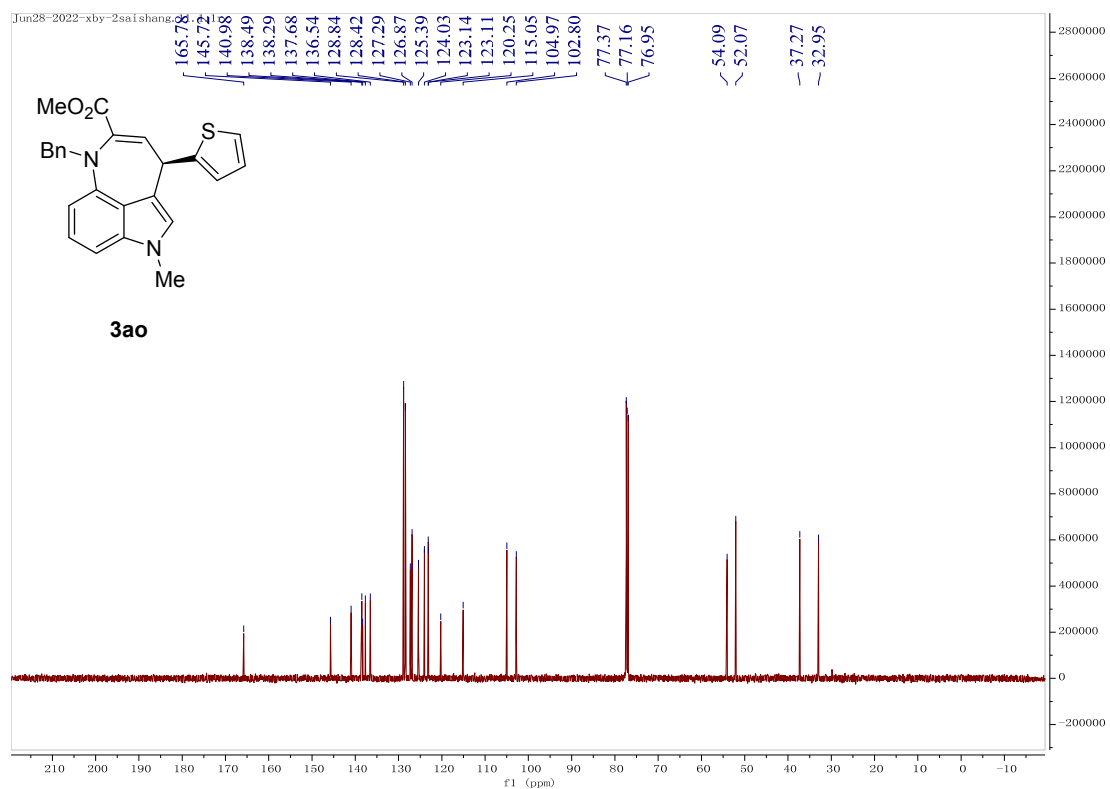



### $^1\text{H}$ NMR Spectrum of 3ap (400 MHz, $\text{CDCl}_3$ )

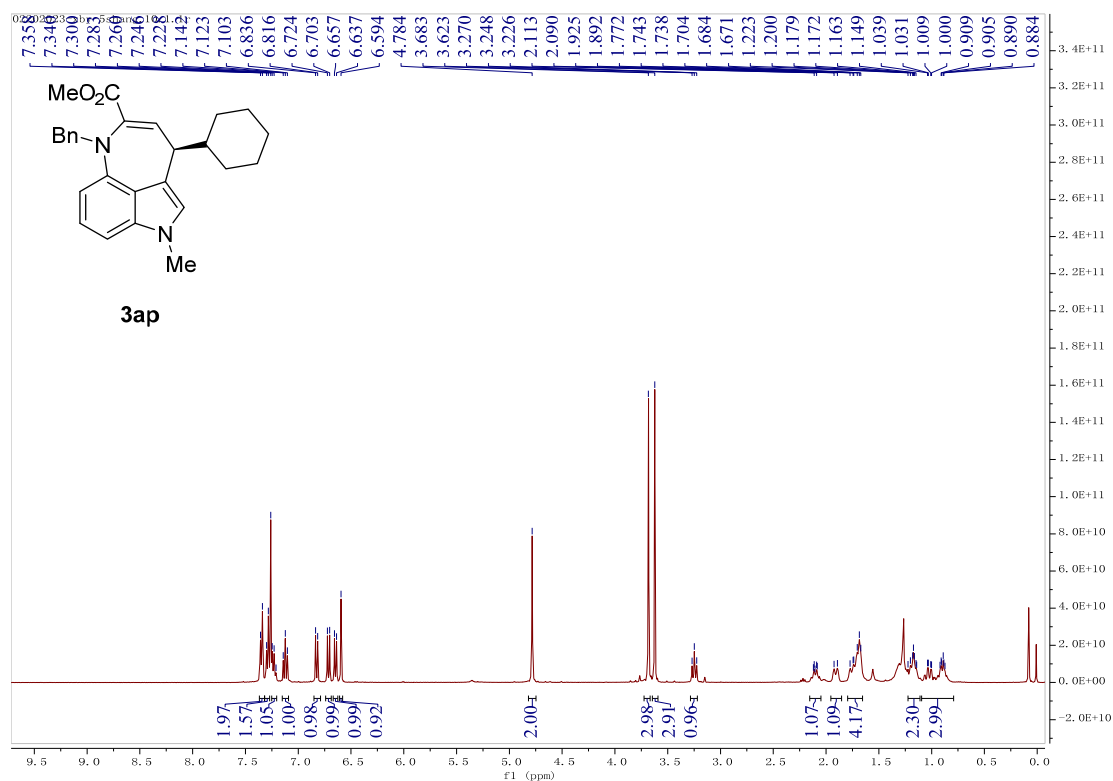

### $^{13}\text{C}\{^1\text{H}\}$ NMR Spectrum of 3ap (100 MHz, $\text{CDCl}_3$ )

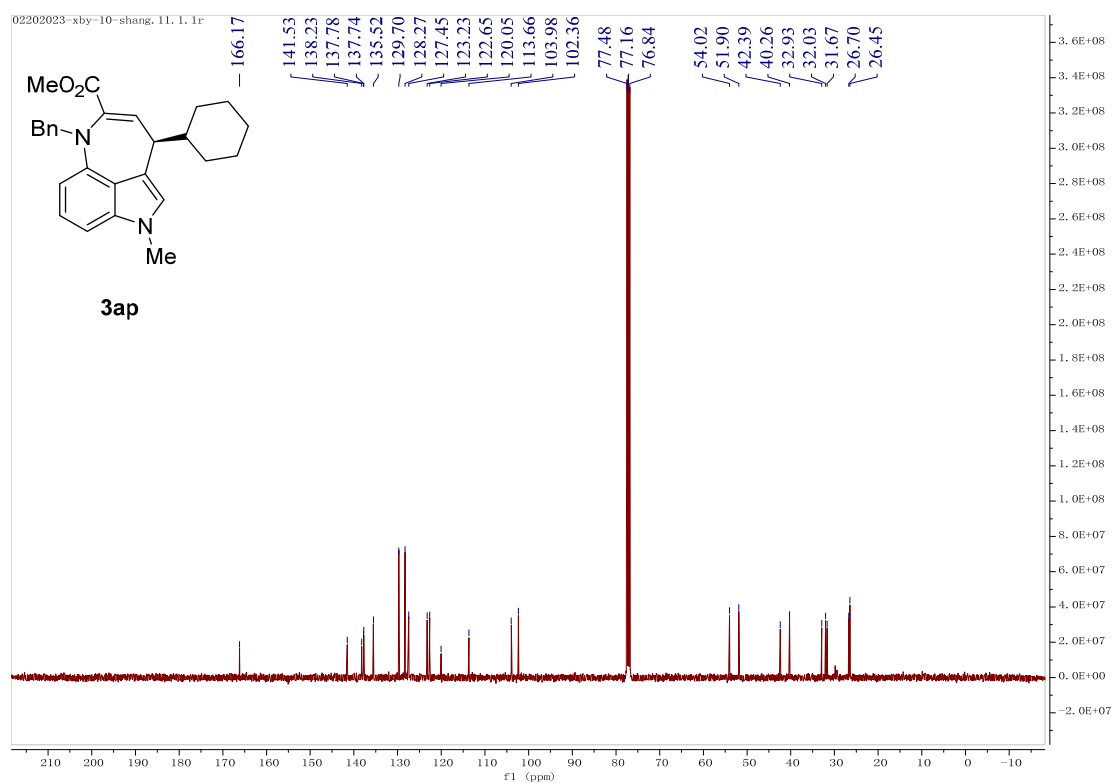

### <sup>1</sup>H NMR Spectrum of 4ap (600 MHz, CDCl<sub>3</sub>)

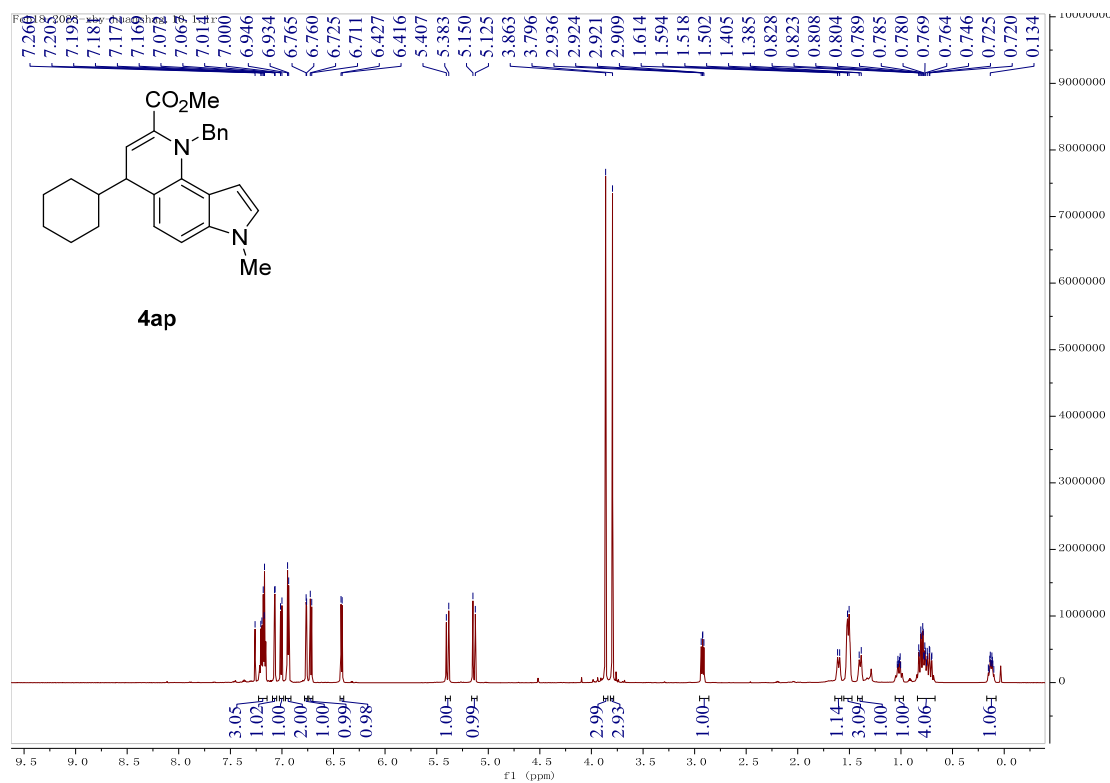

### <sup>13</sup>C{<sup>1</sup>H} NMR Spectrum of 4ap (150 MHz, CDCl<sub>3</sub>)

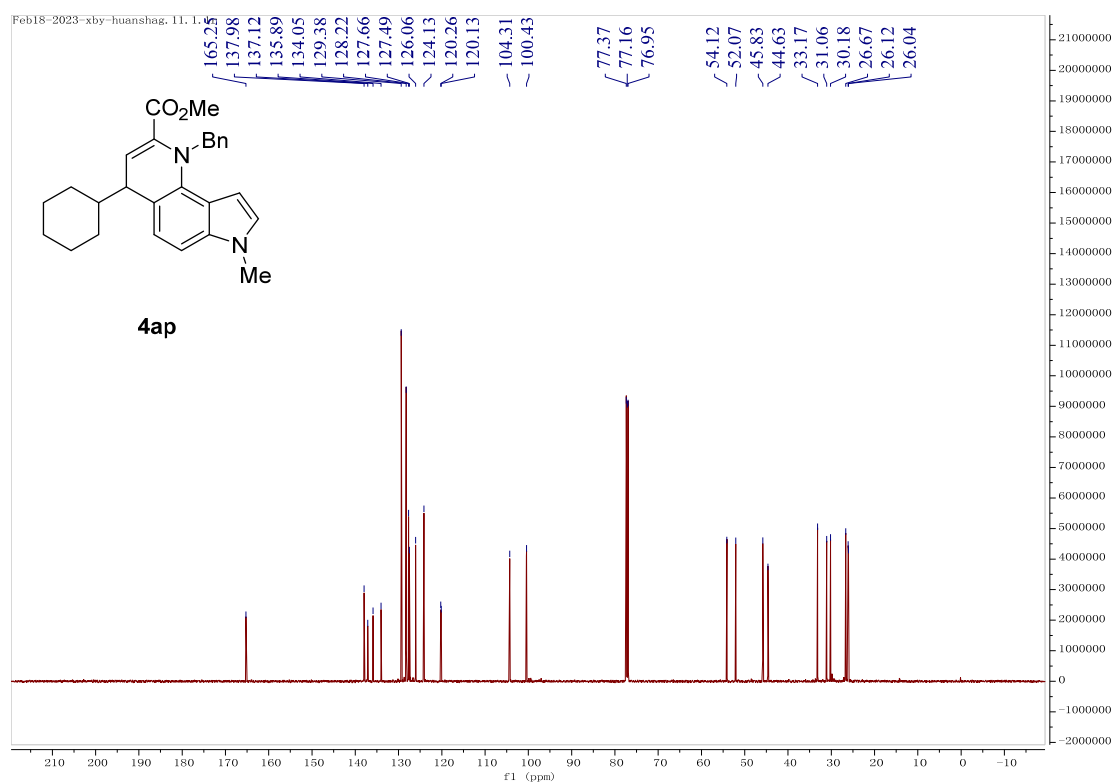

### $^1\text{H}$ NMR Spectrum of 3ba (400 MHz, $\text{CDCl}_3$ )

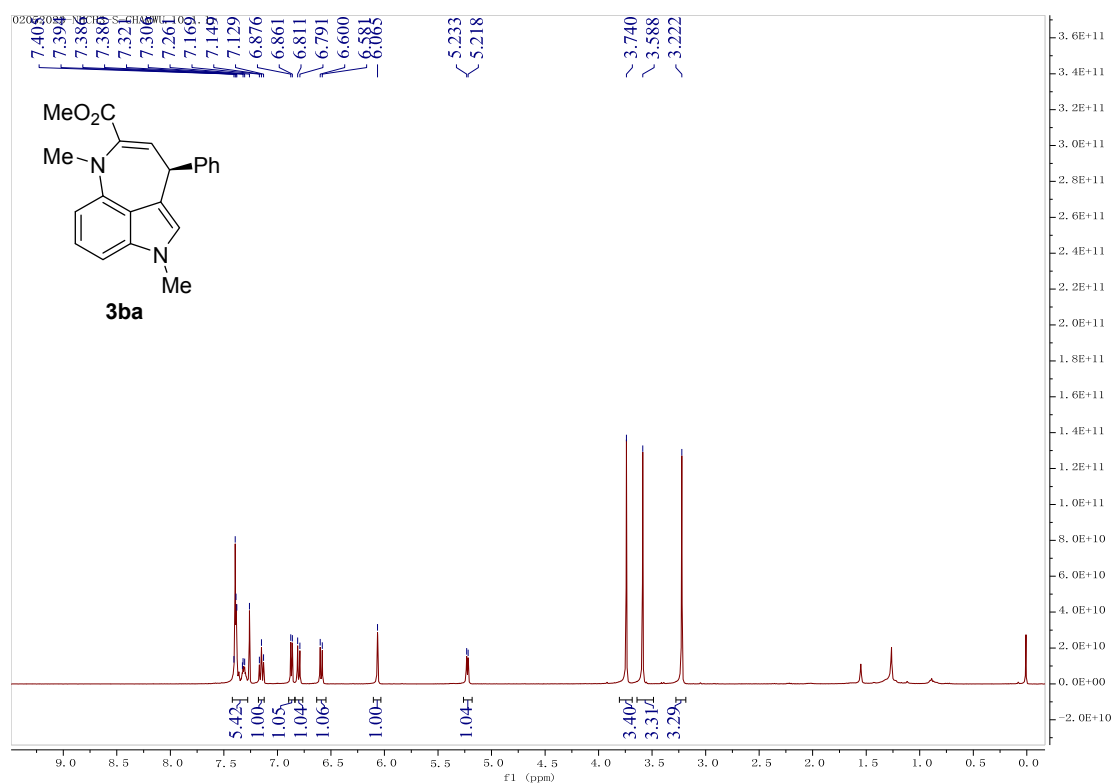

### $^{13}\text{C}\{^1\text{H}\}$ NMR Spectrum of 3ba (100 MHz, $\text{CDCl}_3$ )

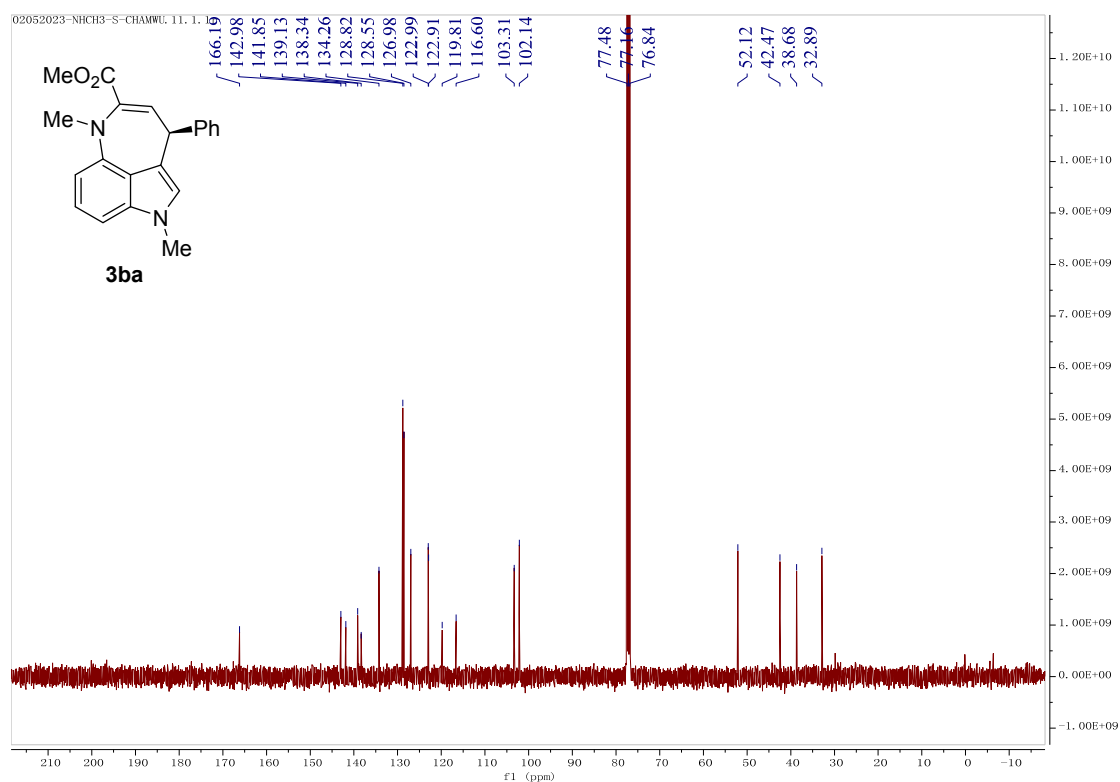

### <sup>1</sup>H NMR Spectrum of 3ca (600 MHz, CDCl<sub>3</sub>)

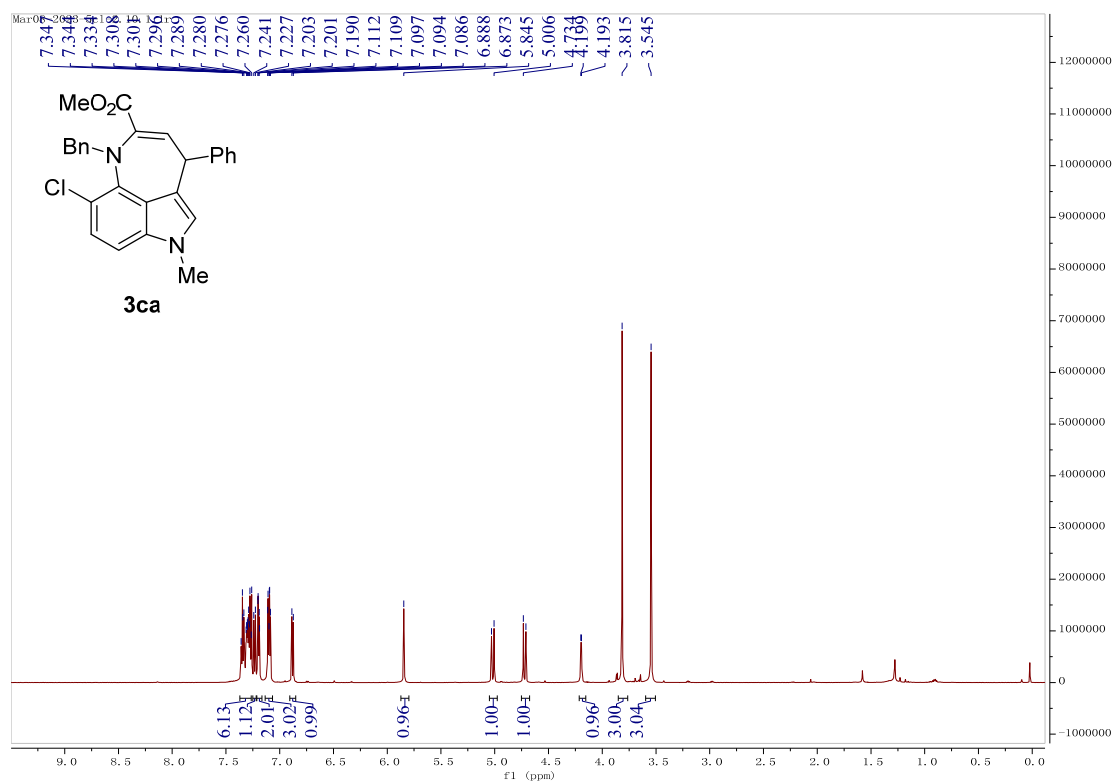

### <sup>13</sup>C{<sup>1</sup>H} NMR Spectrum of 3ca (150 MHz, CDCl<sub>3</sub>)

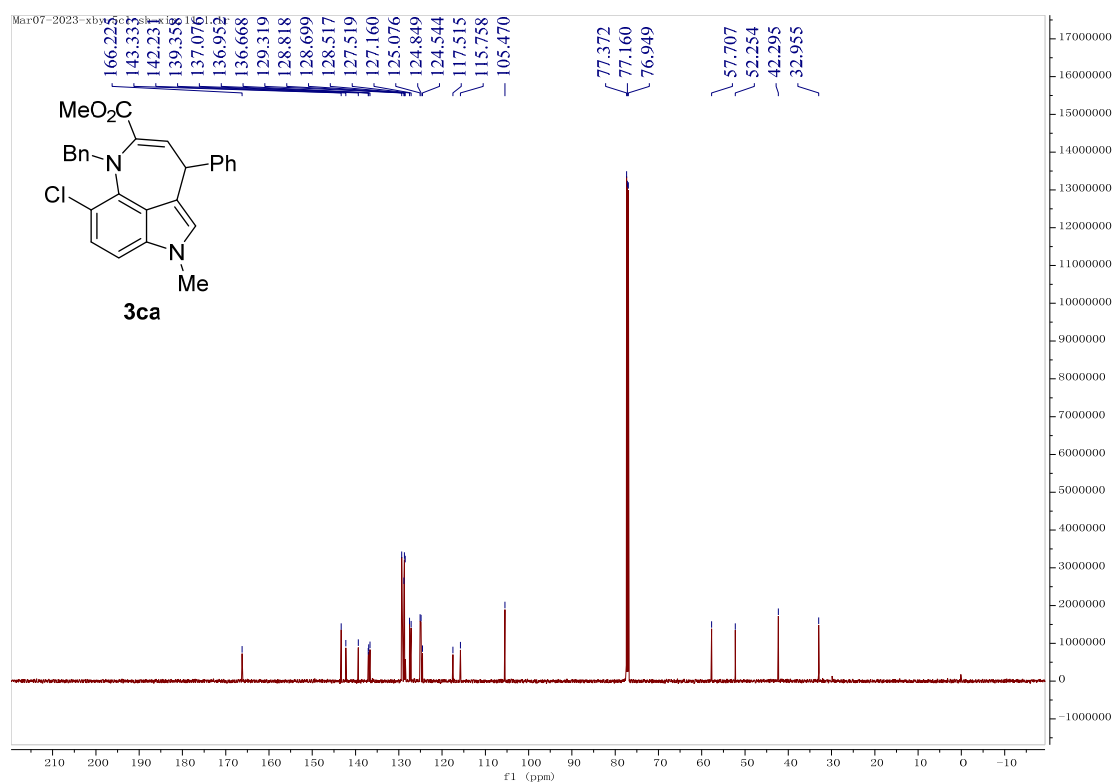

### <sup>1</sup>H NMR Spectrum of 5ca (600 MHz, CDCl<sub>3</sub>)

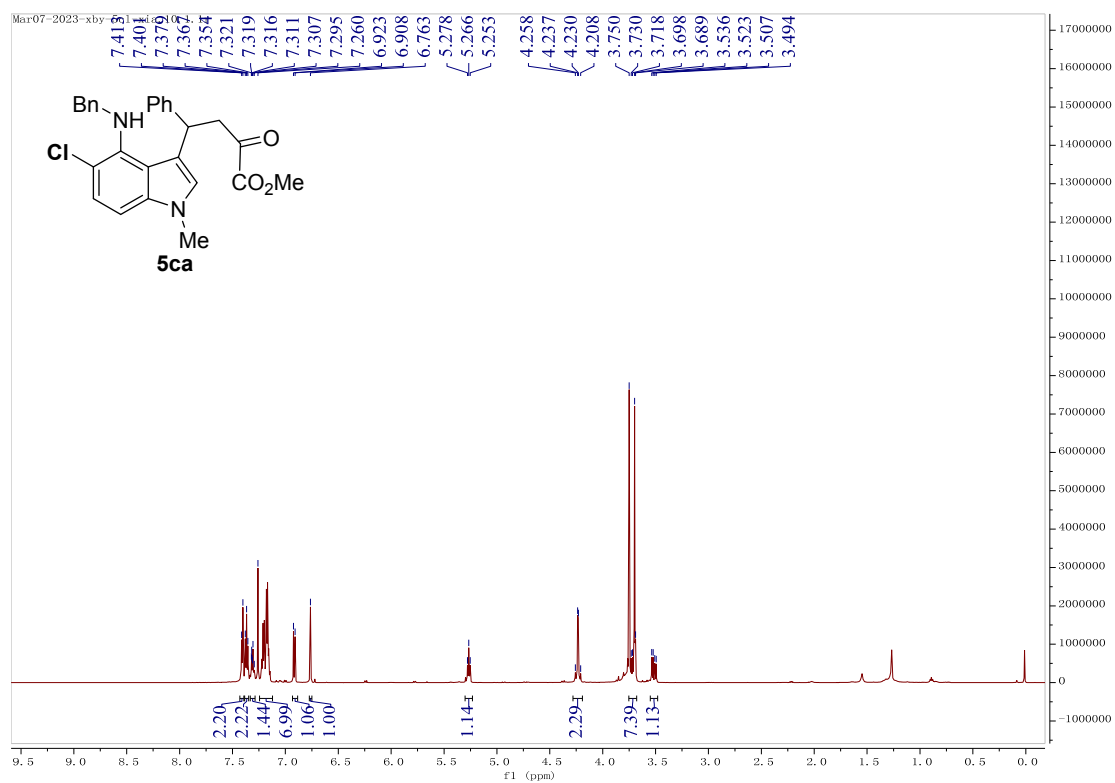

### <sup>13</sup>C{<sup>1</sup>H} NMR Spectrum of 5ca (150 MHz, CDCl<sub>3</sub>)

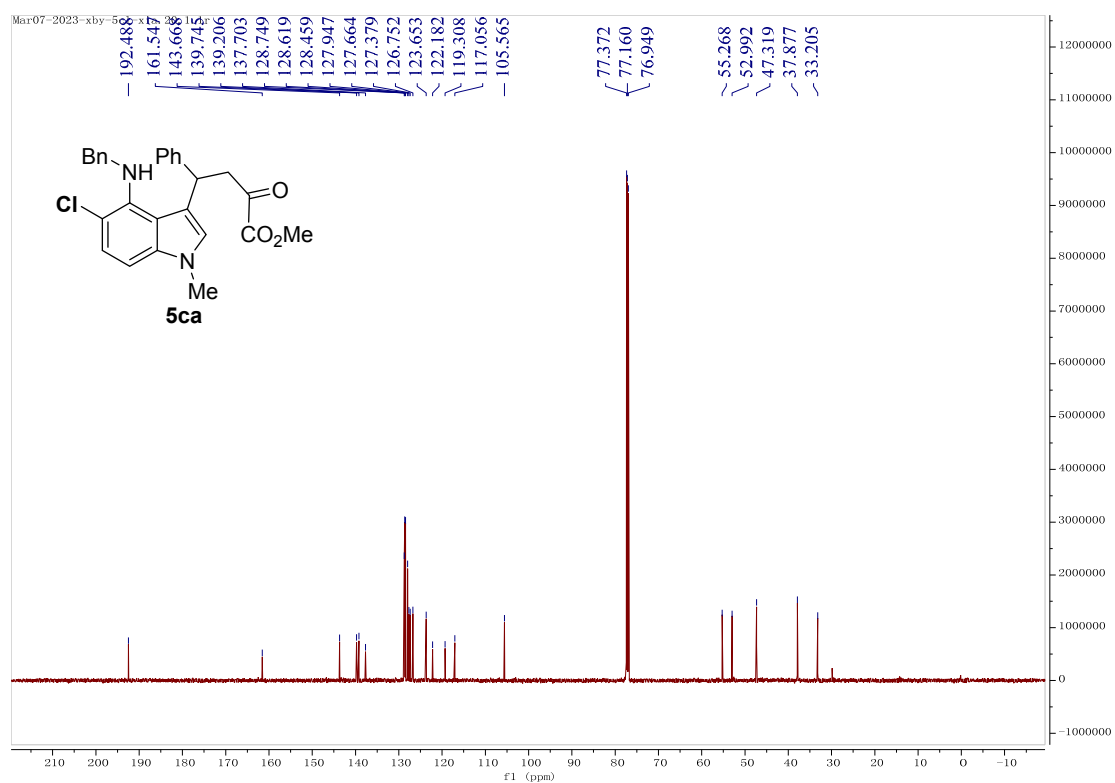

### <sup>1</sup>H NMR Spectrum of 5da (400 MHz, CDCl<sub>3</sub>)

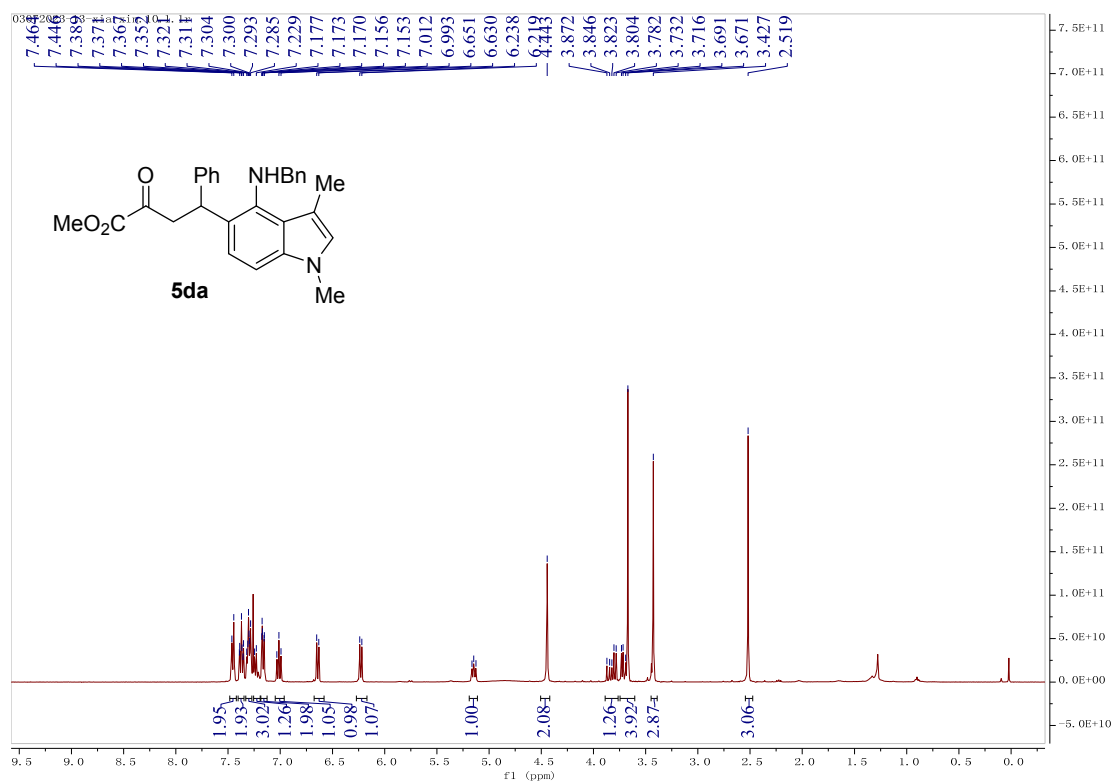

### <sup>13</sup>C{<sup>1</sup>H}NMR Spectrum of 5da (100 MHz, CDCl<sub>3</sub>)

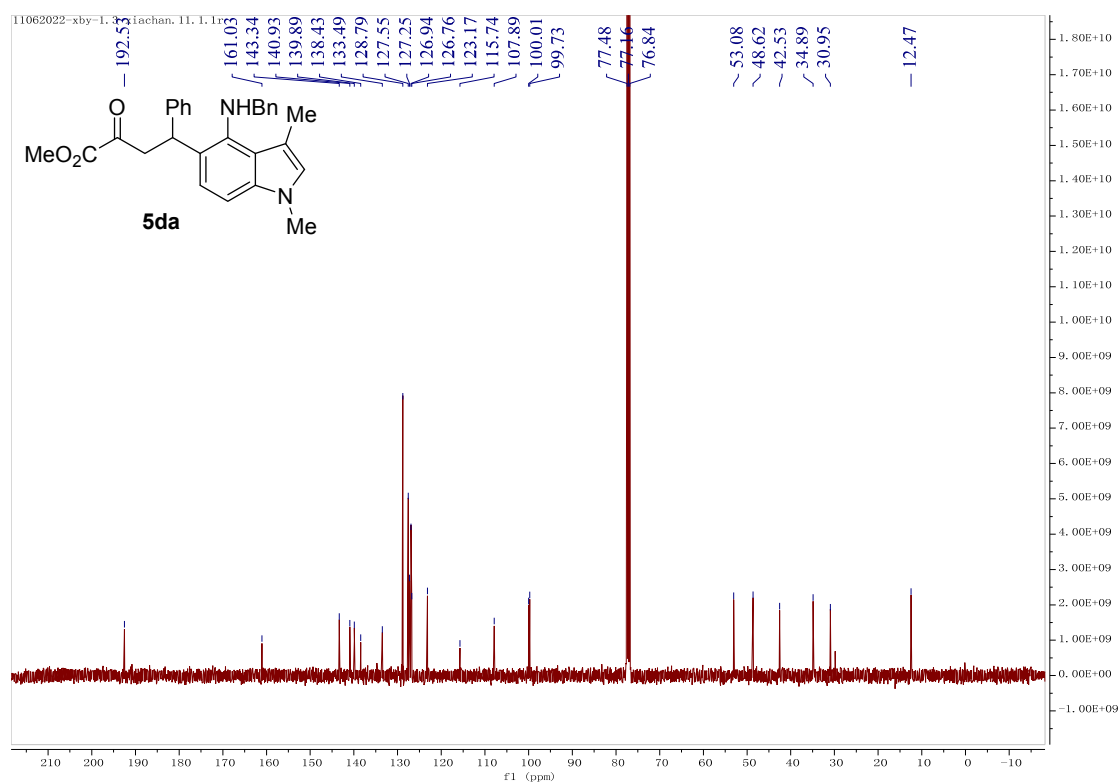

### <sup>1</sup>H NMR Spectrum of 4da (400 MHz, CDCl<sub>3</sub>)

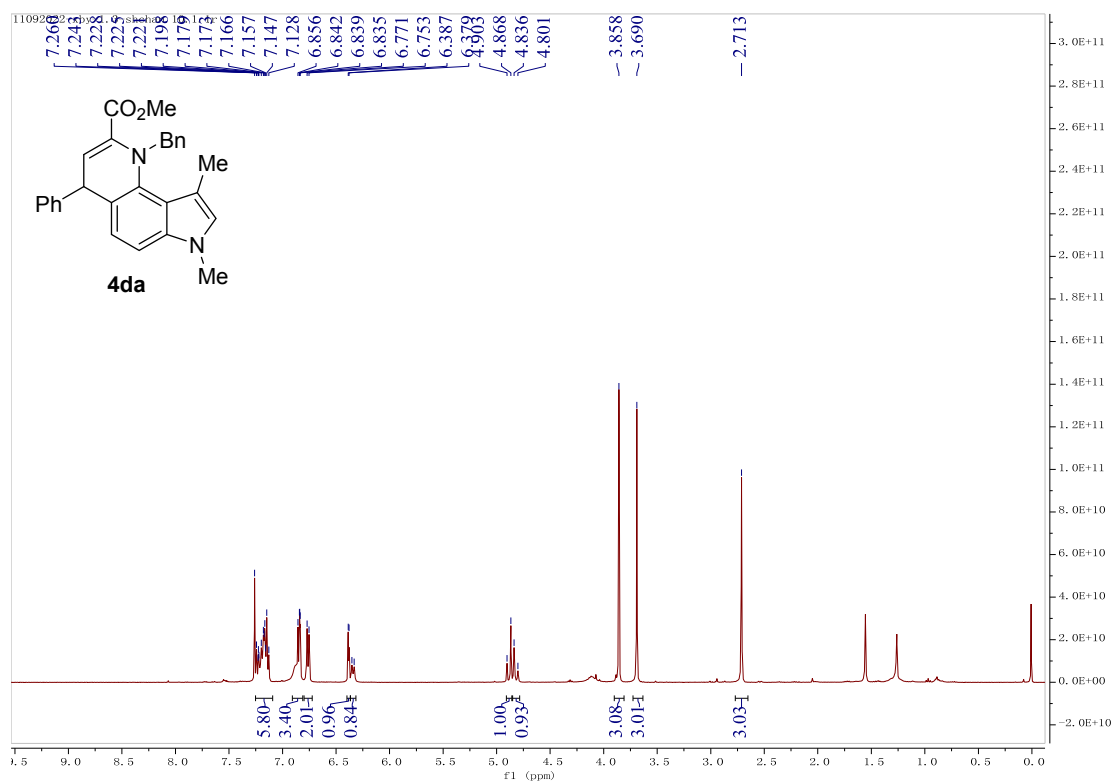

### <sup>13</sup>C{<sup>1</sup>H} NMR Spectrum of 4da (100 MHz, CDCl<sub>3</sub>)

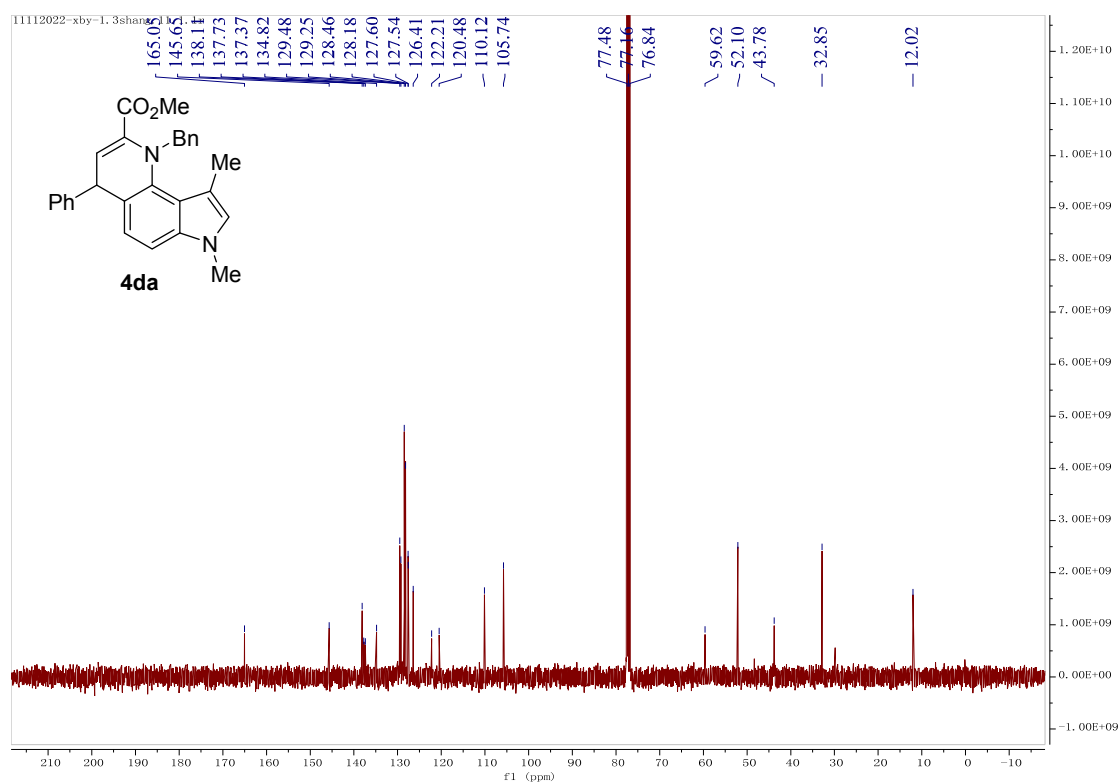

### <sup>1</sup>H NMR Spectrum of S3a(600 MHz, CDCl<sub>3</sub>)

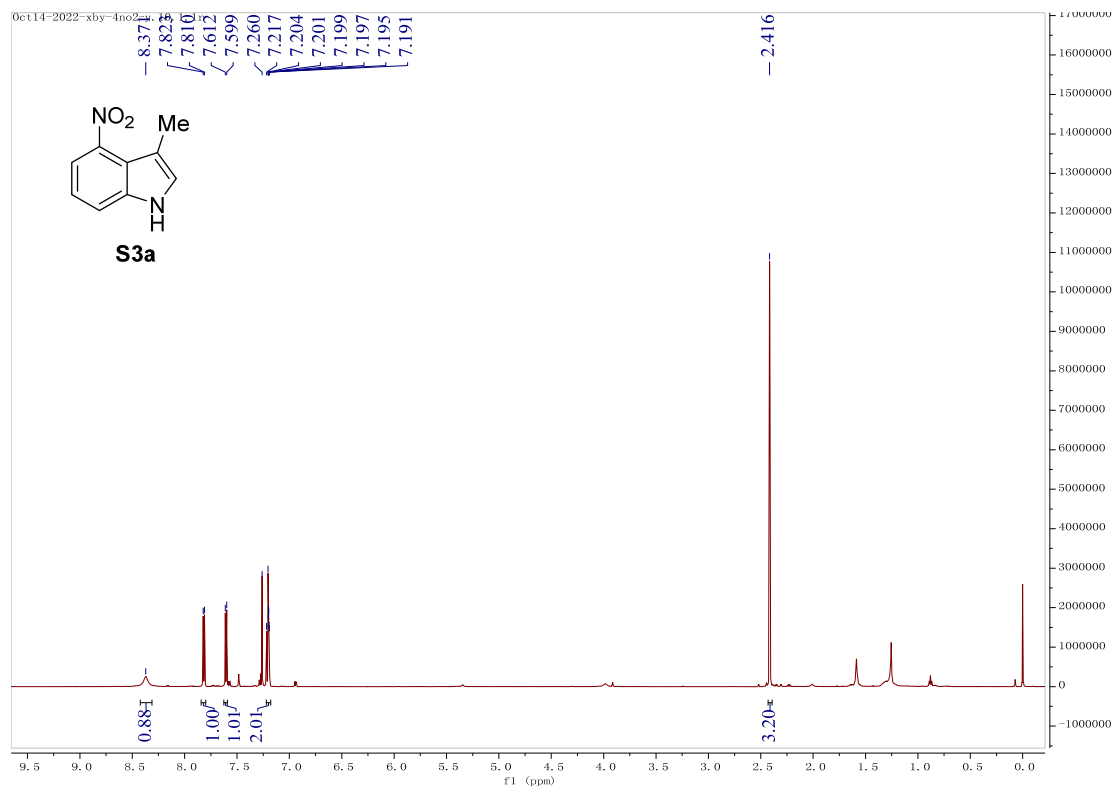

### <sup>13</sup>C{<sup>1</sup>H} NMR Spectrum of S3a (150 MHz, CDCl<sub>3</sub>)

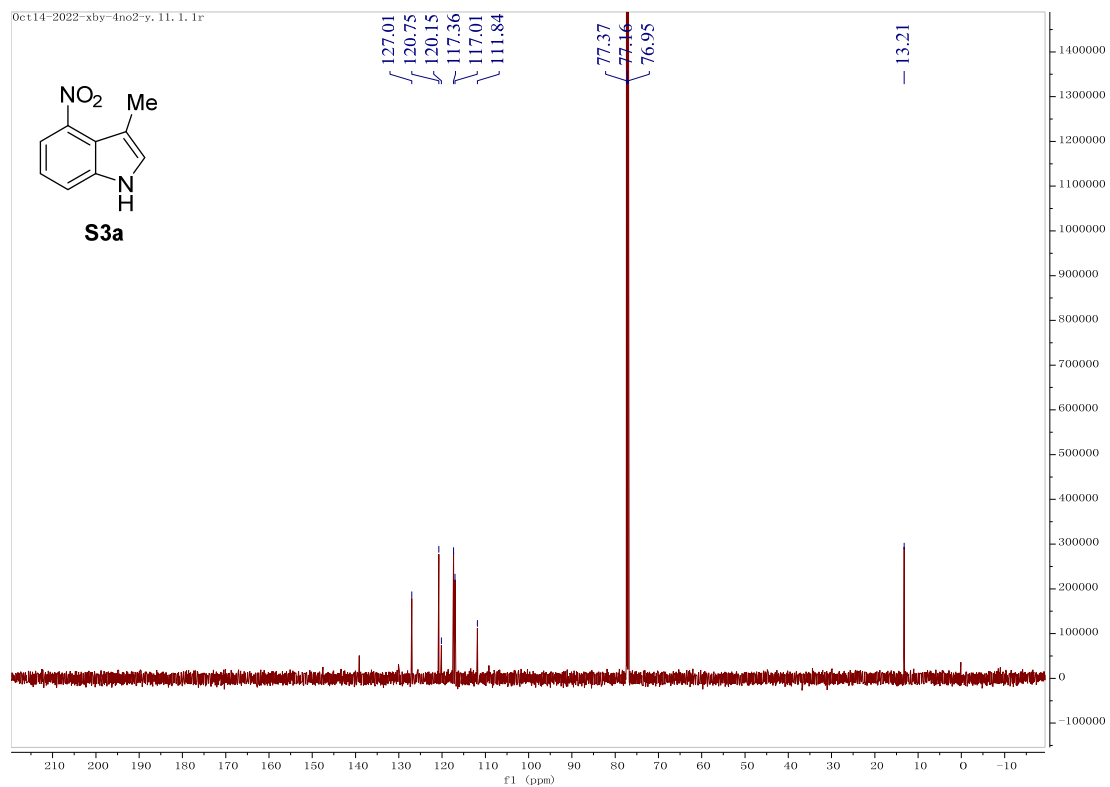



### <sup>1</sup>H NMR Spectrum of S5a (600 MHz, CDCl<sub>3</sub>)

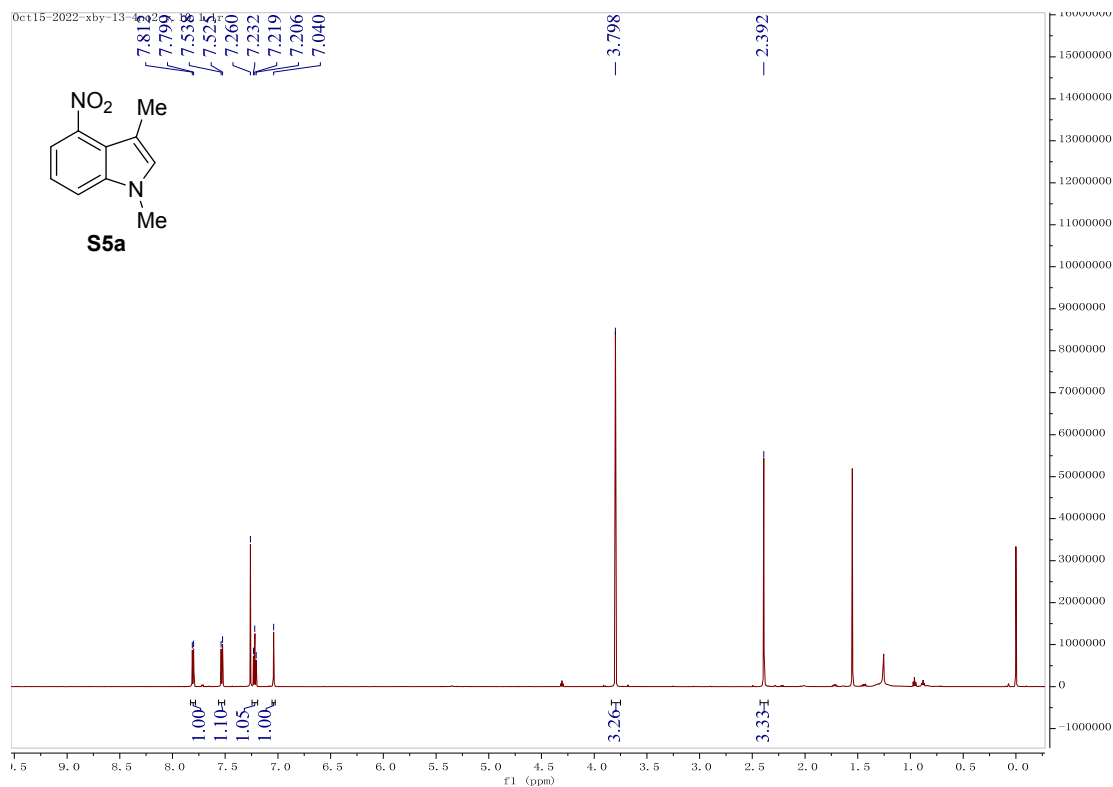

### <sup>13</sup>C{<sup>1</sup>H} NMR Spectrum of S5a (150 MHz, CDCl<sub>3</sub>)

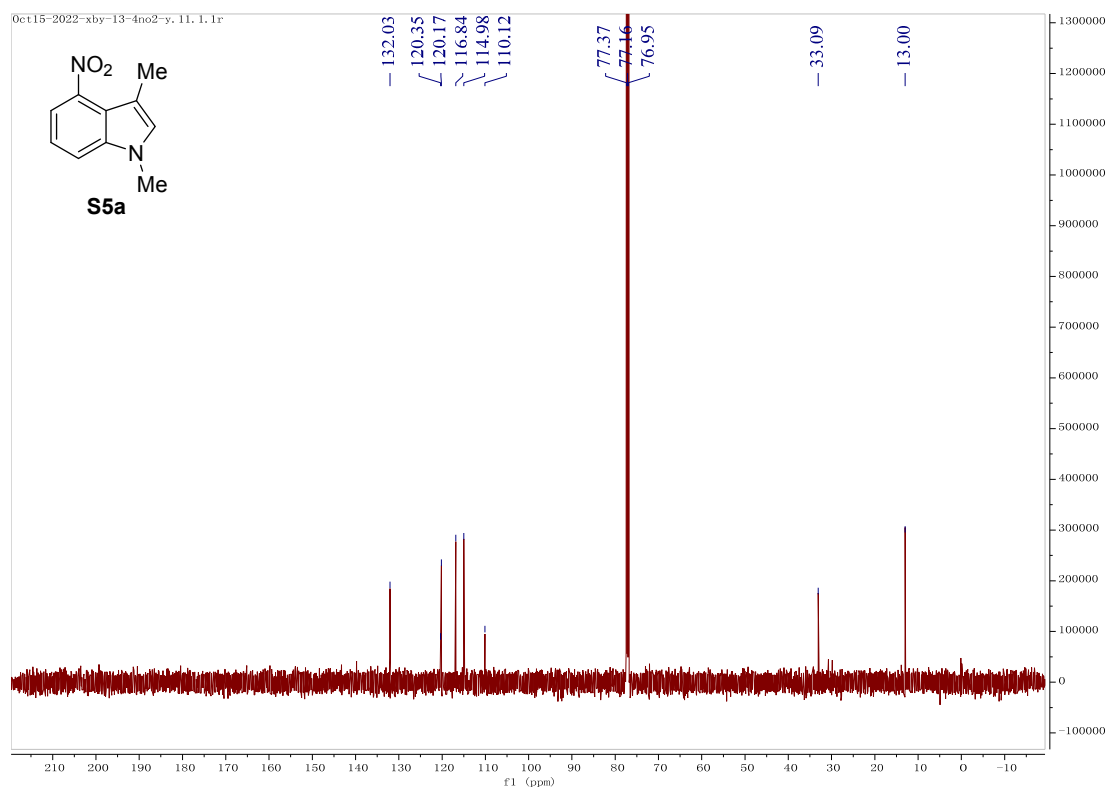

### $^1\text{H}$ NMR Spectrum of 1a (400 MHz, $\text{CDCl}_3$ )

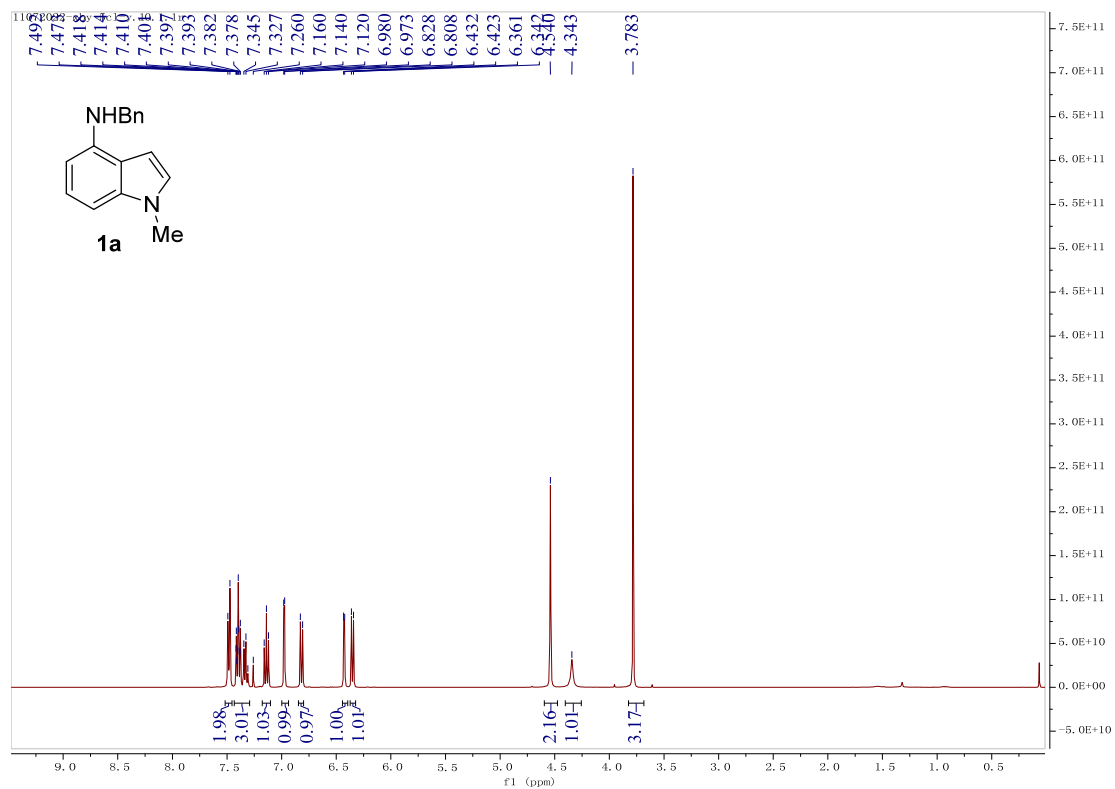

### $^{13}\text{C}\{^1\text{H}\}$ NMR Spectrum of 1a (100 MHz, $\text{CDCl}_3$ )

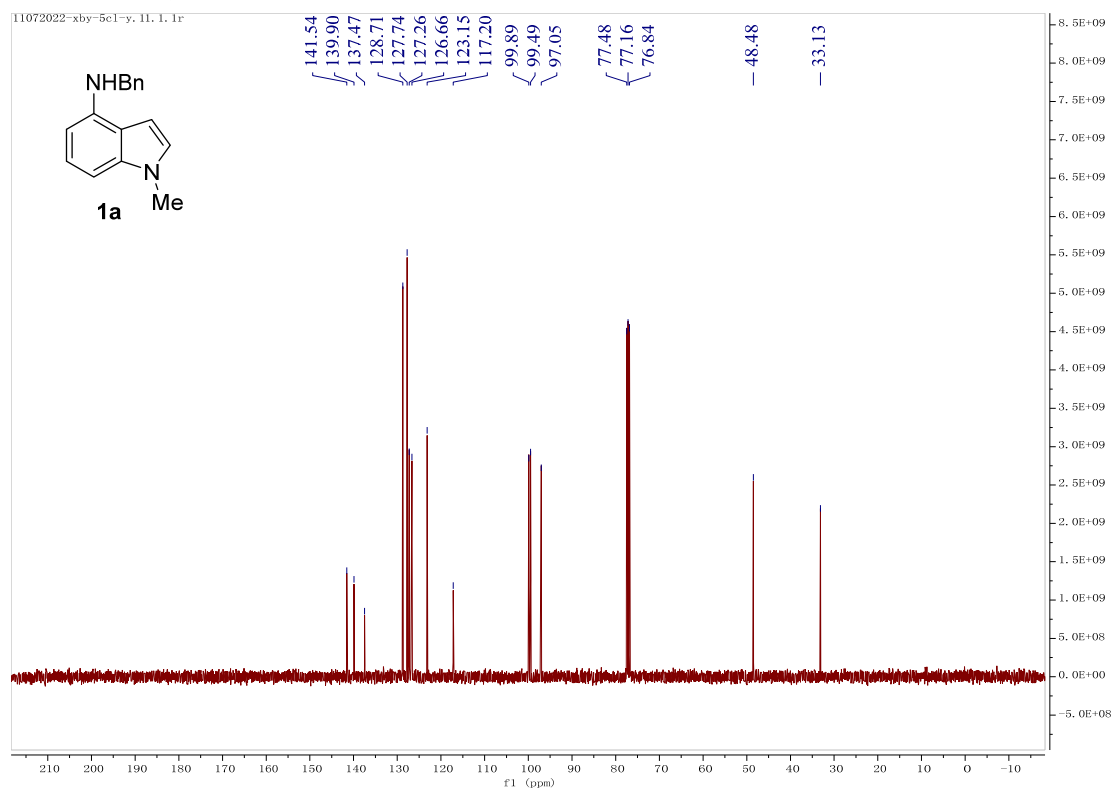

### <sup>1</sup>H NMR Spectrum of 1b (600 MHz, CDCl<sub>3</sub>)

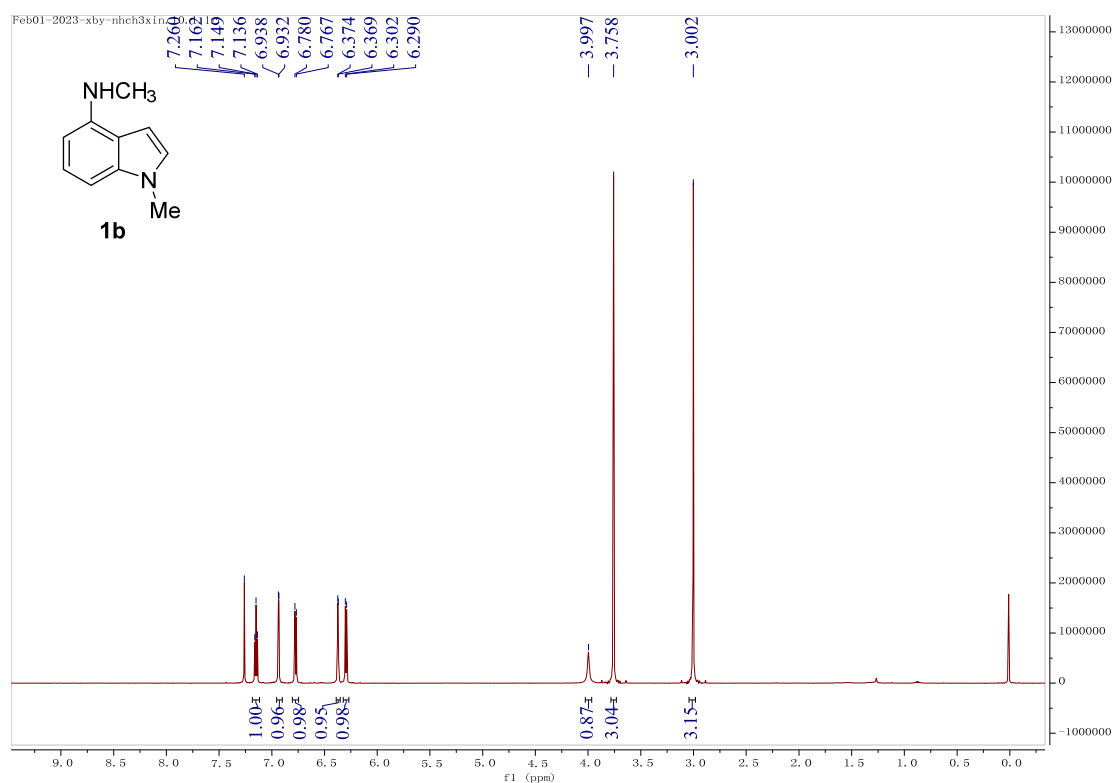

### <sup>13</sup>C{<sup>1</sup>H} NMR Spectrum of 1b (150 MHz, CDCl<sub>3</sub>)

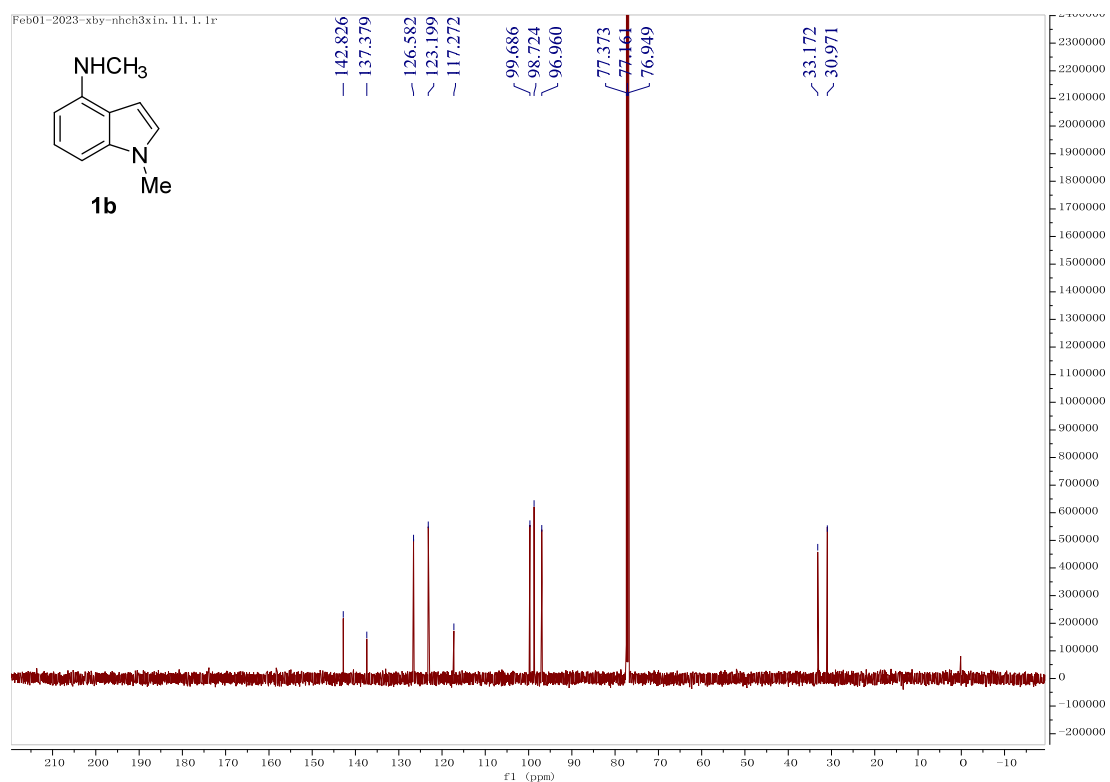

### <sup>1</sup>H NMR Spectrum of 1c (600 MHz, CDCl<sub>3</sub>)

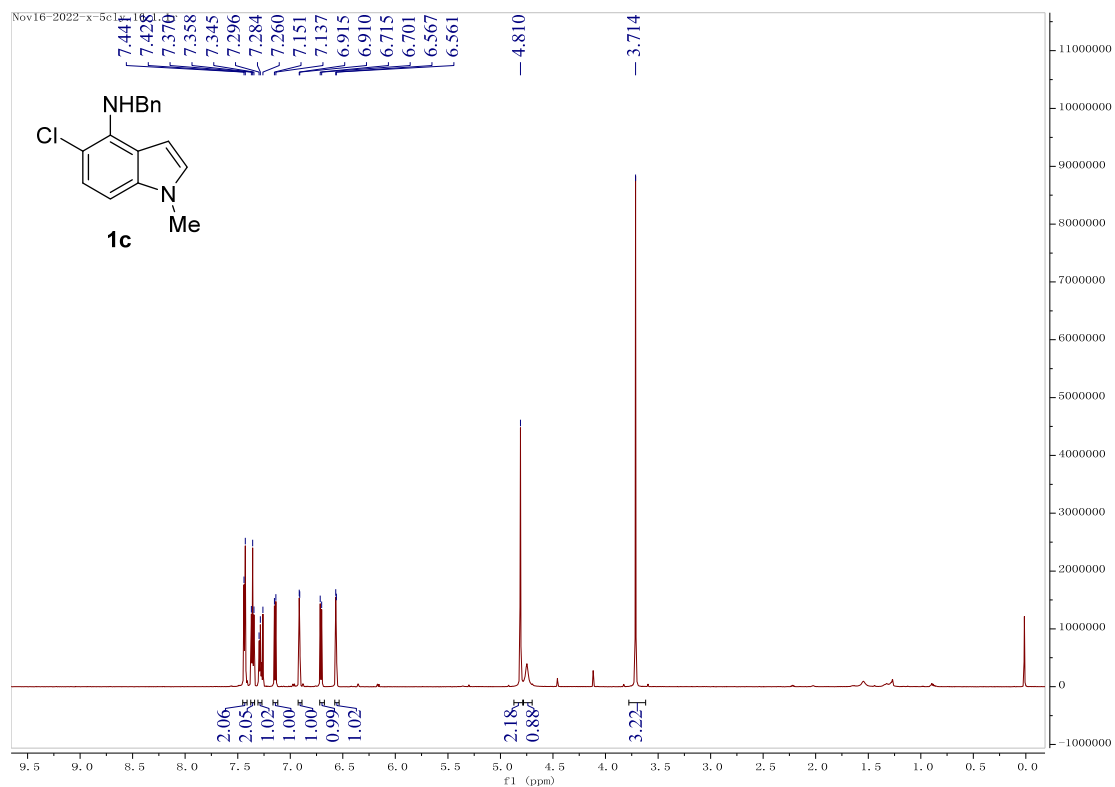

### <sup>13</sup>C{<sup>1</sup>H} NMR Spectrum of 1c (150 MHz, CDCl<sub>3</sub>)

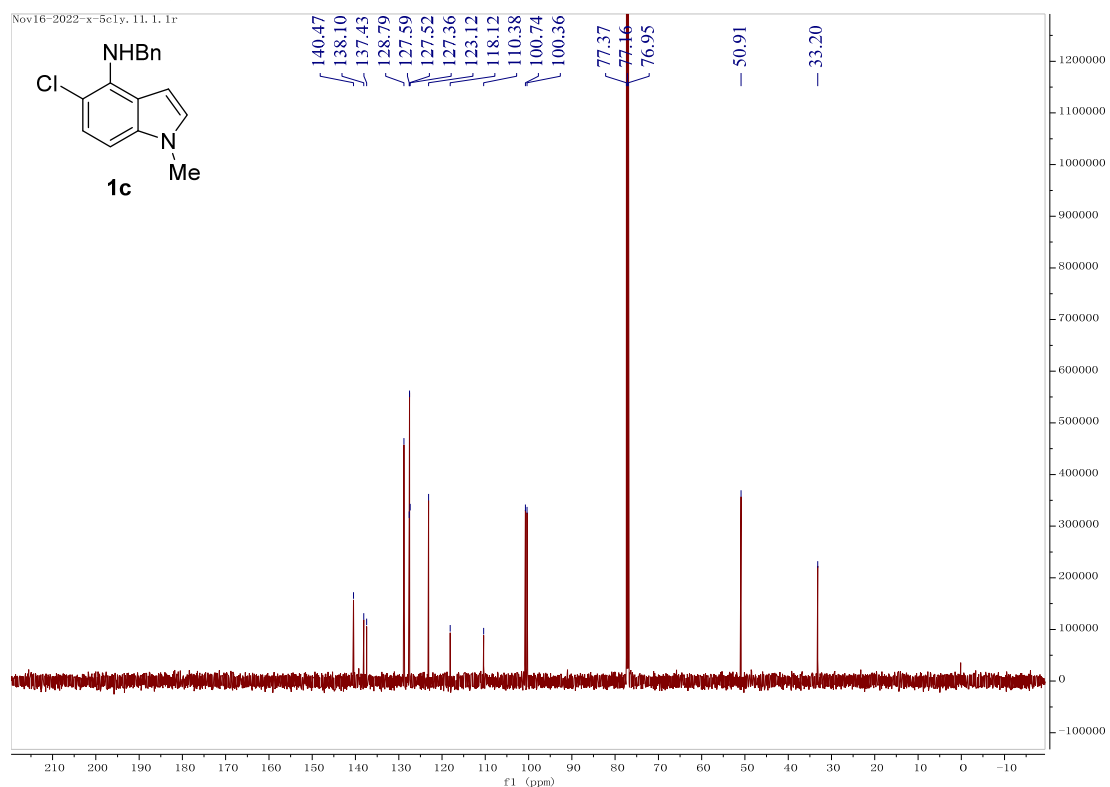

### <sup>1</sup>H NMR Spectrum of 1c' (600 MHz, CDCl<sub>3</sub>)

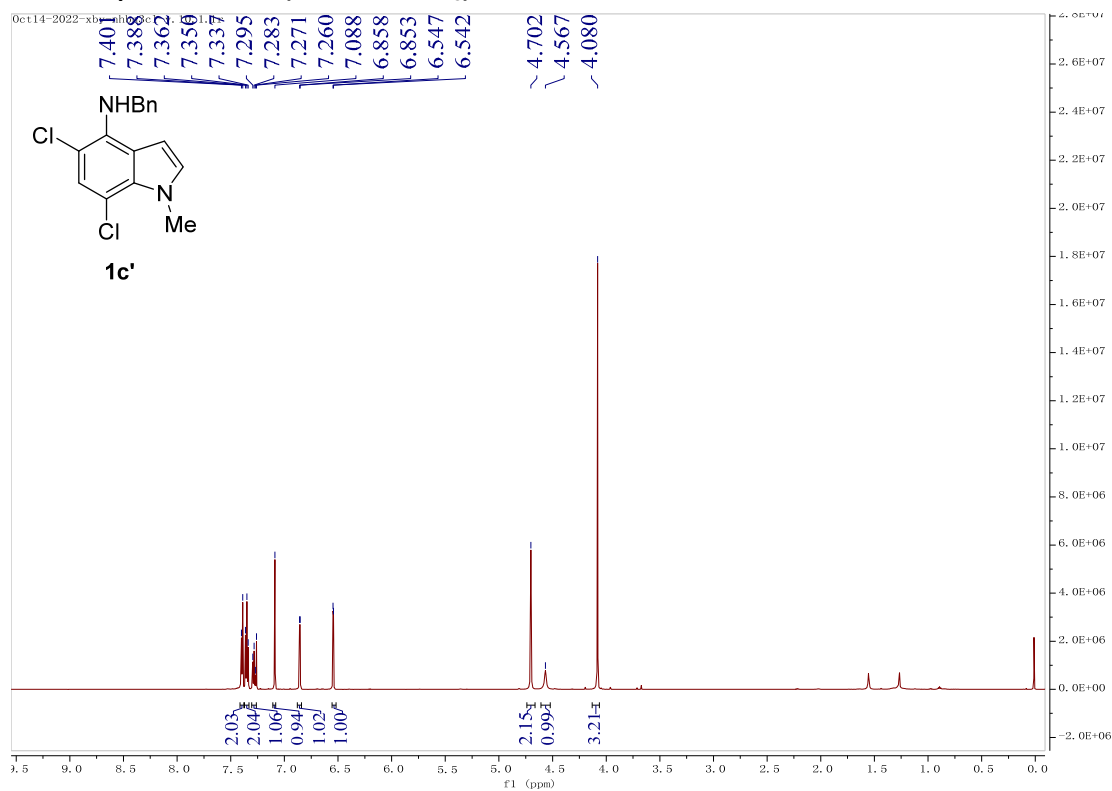

### <sup>13</sup>C{<sup>1</sup>H} NMR Spectrum of 1c' (150 MHz, CDCl<sub>3</sub>)

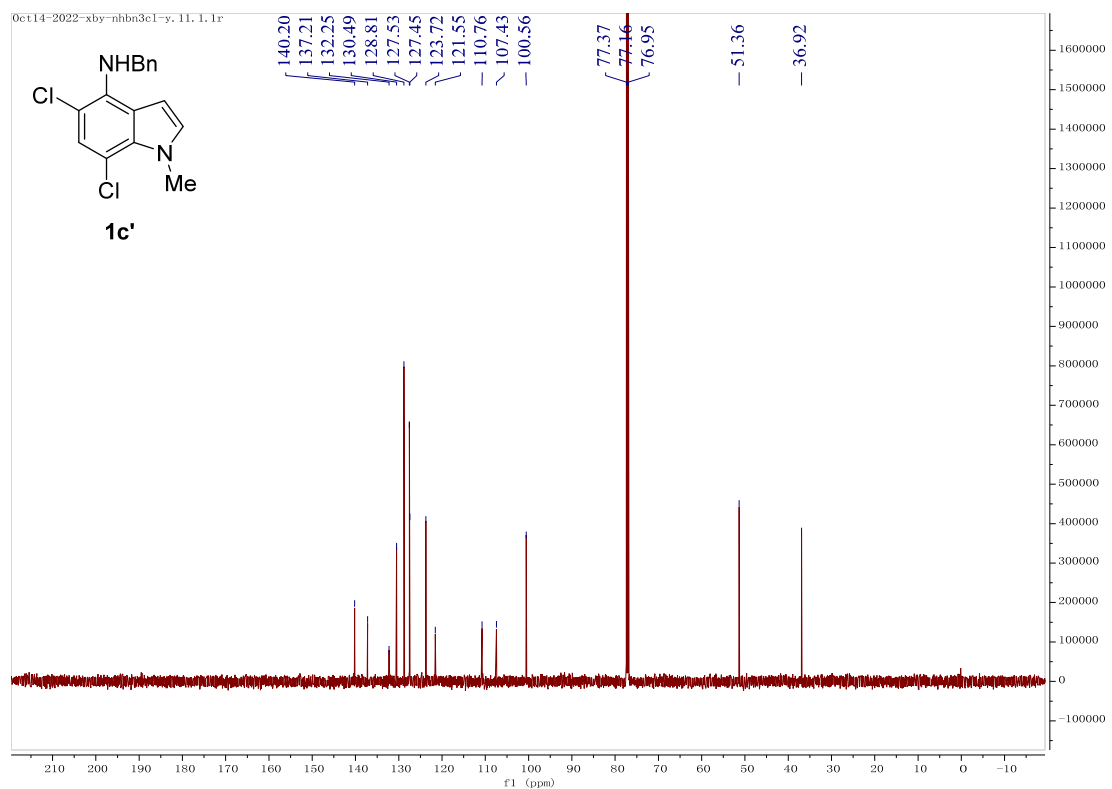

### $^1\text{H}$ NMR Spectrum of 1d (400 MHz, $\text{CDCl}_3$ )

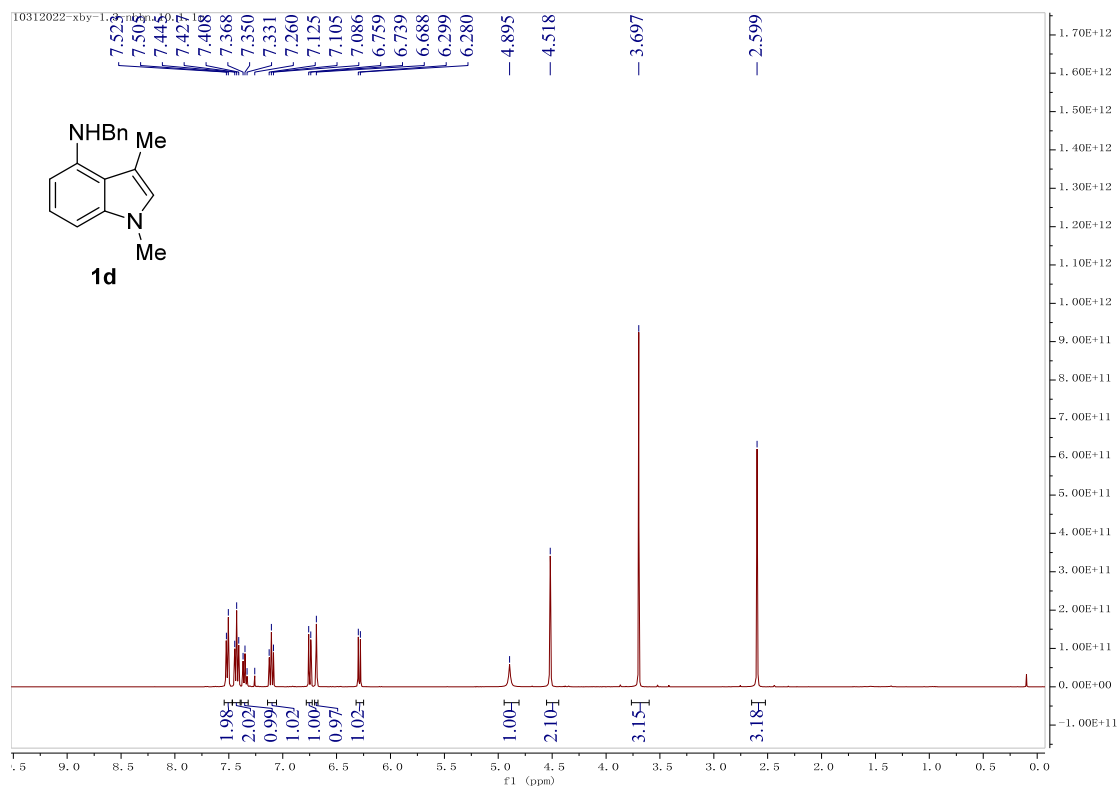

### $^{13}\text{C}\{^1\text{H}\}$ NMR Spectrum of 1d (100 MHz, $\text{CDCl}_3$ )

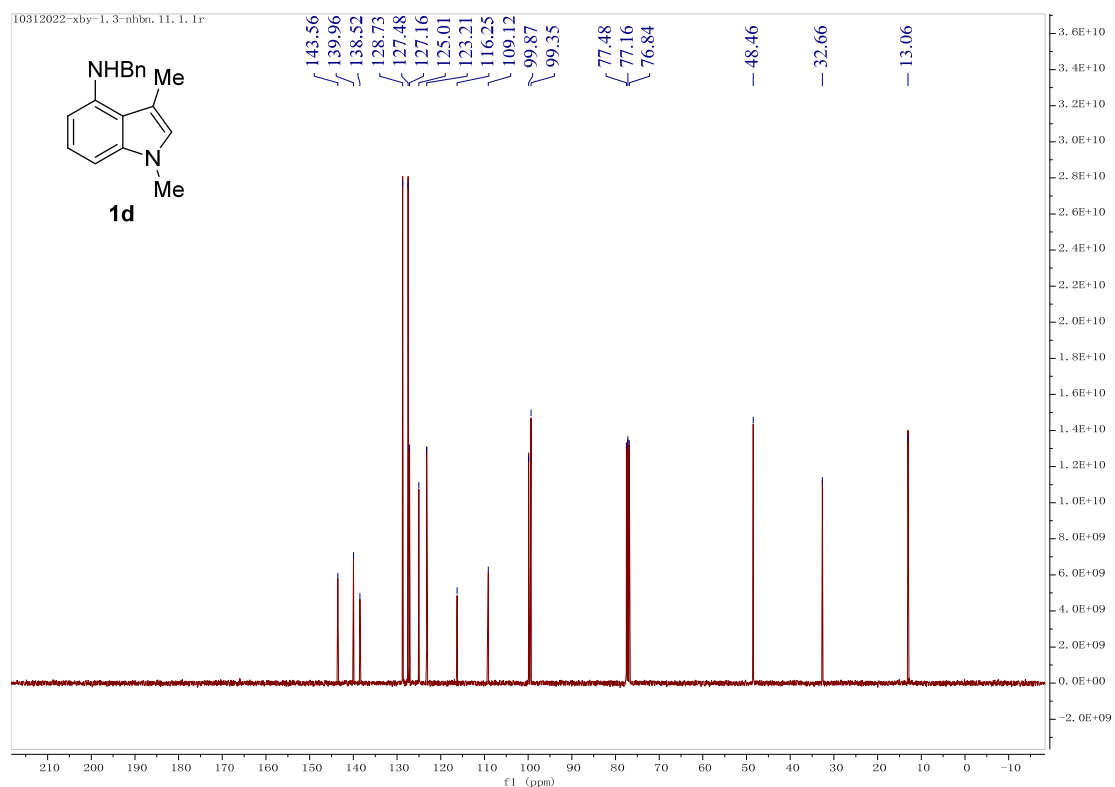

## Reference

- [1] L. Cai, Y. Zhao, T. Huang, S. Meng, X. Jia, A. S. C. Chan and J. Zhao, *Org. Lett.*, 2019, **21**, 3538.
